# Supplementary material for: Isolation of Oral Bacteria, Measurement of the C‐Reactive Protein, and Blood Clinical Parameters in Dogs with Oral Tumor
Source: Hindawi journal article supplement (doi:10.1155/2023/2582774), 2023-01-01
Supplement: f1 [file 2582774.f1.zip]

**The nucleotide sequences of bacterial isolates from the dogs with oral mass**

| Sequence                                                                                                                                                                                                                                                                                                                                                                                                                                                                                                                                                                                                                                                                                                                                                                                                                                                                                                                                                                                                                                                                                                                                                                                                                                                                                                                                                                                                                                                                                                                                                                                                                                                                                                                                                                                                                                                                                                                                                                                                                                                                                                                                                                                                                                                                                                                                                                                                                                                                                                                                                                                                                                                                                                                                                                                                                                                                                                                                                                                                                                                                                                                                                                  | % Identical | Bacterial identification     |
|---------------------------------------------------------------------------------------------------------------------------------------------------------------------------------------------------------------------------------------------------------------------------------------------------------------------------------------------------------------------------------------------------------------------------------------------------------------------------------------------------------------------------------------------------------------------------------------------------------------------------------------------------------------------------------------------------------------------------------------------------------------------------------------------------------------------------------------------------------------------------------------------------------------------------------------------------------------------------------------------------------------------------------------------------------------------------------------------------------------------------------------------------------------------------------------------------------------------------------------------------------------------------------------------------------------------------------------------------------------------------------------------------------------------------------------------------------------------------------------------------------------------------------------------------------------------------------------------------------------------------------------------------------------------------------------------------------------------------------------------------------------------------------------------------------------------------------------------------------------------------------------------------------------------------------------------------------------------------------------------------------------------------------------------------------------------------------------------------------------------------------------------------------------------------------------------------------------------------------------------------------------------------------------------------------------------------------------------------------------------------------------------------------------------------------------------------------------------------------------------------------------------------------------------------------------------------------------------------------------------------------------------------------------------------------------------------------------------------------------------------------------------------------------------------------------------------------------------------------------------------------------------------------------------------------------------------------------------------------------------------------------------------------------------------------------------------------------------------------------------------------------------------------------------------|-------------|------------------------------|
| GGCTCAGATTGAACGCTGGCGGCATGCTTTACACATGCAAGTCGGACGGCAGCACAGAGAAGCTTGCTTCTTGGG<br>TGGCGAGTGGCGAACGGGTGAGTAATGCATCGGAACGTACCGAGTAGTGGGGGATAACTGTCCGAAAGGATGGC<br>TAATACCGCATACGCTTTGAGAAGGAAAGCAGGGGCTCTTCGGACCTTGCGCTATTTCGAGCGGCCGATGTCTGAT<br>TAGCTGGTTGGTGGGGTAAAGGCCTACCAAGGCGACGATCAGTAGCGGGTCTGAGAGGATGATCCGCCACACTGG<br>GACTGAGACACGGGCCAGACTCCTACGGGAGGCAGCAGTGGGGAATTTTGGACAATGGGCGCAAGCCTGATCCA<br>GCCATGCCGCGTGTCTGAAGAAGGCCTTCGGGTTGTAAAGGACTTTTGTACAGGGAAGAAAAGGTTGTGGTTAATA<br>CCCATGACTGATGACGGTACCTGAAGAATAAGCACCGGCTAACTACGTGCCAGCAGCCGCGTAATACGTAGGGT<br>GCGAGCGTTAATCGGAATTACTGGGCGTAAAGCGGGCGCAGACGGTTACTTAAGTCAGATGTGAAATCCCCGGGC<br>TCAACCTGGGAAGTGCCTTTGAAACTGGGTGACTAGAGTATGTACAGAGGGGGGTAGAATTCCACGTGTAGCAGTG<br>AAATGCGTAGAGATGTGGAGGAATACCGATGGCGAAGGCAGCCCCCTGGGATAATACTGACGTTTCATGCCCGAA<br>AGCGTGGGTAGCAAACAGGATTAGATACCTGGTAGTCCACGCCCTAAACGATGTCAATTAGCTGTTGGGCAACT<br>TGATTGCTTAGTAGCGTAGCTAACGCGTGAAATTGACCGCTGGGGAGTACGGTCGCAAGATTAAGTCAAAAGG<br>AATTGACGGGGACCCGCACAAGCGGTGGATGATGTGGATTAATTTCGATGCAACGCGAAGAACCCTTACCTGGTCTT<br>GACATGTACGGAATCCTCCAGAGACGGAGGTGCCTTCGGGAGCCGTAACACAGGTGCTGCATGGCTGTCGTCA<br>GCTCGTGTGCTGAGATGTTGGGTTAAGTCCCGCAACGAGCGCAACCCTTGTCAATTAGTTGCCATCATTTGGTTGGG<br>CACTCTAATGAGACTGCCGGTGACAAGCCGGAGGAAGGTGGGGATGACGTCAAGTCCTCATGGCCCTTATGACCA<br>GGGCTTCACACGTGCATACAATGGTCCGTACAGAGGGTAGCCAAGCCGCGAGGTGGAGCCAATCCACAAAACCG<br>ATCGTAGTCCGGATTGCACTCTGCAACTCGAGTGCATGAAGTCGGAATCGCTAGTAATCGCAGGTGACGATACTG<br>CGGTGAATACGTTCCCGGGTCTTGTACACACCGCCGTCACACCATGGGAGTGGGGGATACCAGAAGTAGGTAGG<br>CTCAGGACGAAACGCTGGCGGGCTGCCTAATACATGCAAGTCGAACGCTTCTTTCCCGAGTGCTTGCACTCAAT<br>TGGAAGAGGAGTGGCGGACGGGTGAGTAACACGTGGGTAACTACCCATCAGAGGGGGATAACACTTGGAAC<br>AGGTGCTAATACCGCATAACAGTTTATGCCGCATGGCATAAGAGTGAAAGGCGCTTTCGGGTGTCGCTGATGGAT<br>GGACCCGCGGTGCATTAGCTAGTTGGTGAGGTAACGGCTCACCAGGCCACGATGCATAGCCGACCTGAGAGGGT<br>GATCGGCCACACTGGGACTGAGACACGGCCCAGACTCCTACGGGAGGCAGCAGTAGGGAATCTTCGGCAATGGA<br>CGAAAGTCTGACCGAGCAACGCCGCGTGAGTGAAGAAGGTTTTTCGGATCGTAAACTCTGTTGTTAGAGAAGAAC<br>AAGGACGTTAGTAAGTGAACGTCCCCTGACGGTATCTAACAGAAAGCCACGGCTAACTACGTGCCAGCAGCCGC<br>GGTAATACGTAGGTGGCAAGCGTTGTCCGGATTTATTGGGCGTAAAGCGAGCGCAGGCGGTTTCTTAAGTCTGAT<br>GTGAAAGCCCCGGCTCAACCGGGGAGGGTCAATTGGAAGTGGGAGACTTGAGTGCAGAAGAGGAGAGTGGAAAT<br>TCCATGTGTAGCGGTGAAATGCGTAGATATATGGAGGAACACCACTGGCGAAGGCGGCTCTCTGGTCTGTAAGT<br>ACGCTGAGGCTCGAAAGCGTGGGGAGCAAACAGGATTAGATACCTGGTAGTCCACGCCGTAAACGATGAGTGC<br>TAAGTGTGAGGGGTTTCCGCCCTTCAGTGCTGCAGCAAACGCATTAAGCACTCCGCCTGGGGAGTACGACCGCA<br>AGGTTGAAACTCAAAGGAATTGACGGGGGCCCCGACAAGCGGTGGAGCATGTGGTTTAATTCGAAGCAACGCCA<br>AGAACCTTACCAGGTCTTGACATCCTTTGACCACTCTAGAGATAGAGCTTTCCCTTCGGGGACAAAAGTGACAGGT<br>GGTGCATGGTTGTGCTCAGCTCGTGTGAGATGTTGGGTTAAGTCCCGCAACGAGCGCAACCTTATTGTTAGT<br>TGCCATCATTTAGTTGGGCACTCTAGCGAGACTGCCGGTGACAAAACCGGAGGAAGGTGGGGATGACGTCAAATCA<br>TCATGCCCCCTTATGACCTGGGCTACACACGTGCTACAATGGGAAGTACAACGAGTCGCTAGACCGCGAGGTCATG<br>CAAATCTCTTAAAGCTTCTCTCAGTTCGGATTGCAGGCTGCAACTCGCCTGCATGAAGCCGGAATCGCTAGTAATC<br>GCGGATCAGCACGCCGCGGTGAATACGTTCCCGGGCCTTGTACACACCGCCCGTCACACCAGGAGTGTGTAAC<br>ACCCGAAGTCGCTGAGGTAACCTTTTGGAGCCAGCCGCTAAGGTGGGATAGATGATTGGGGTGAA | 100         | <i>Neisseria zoodegmatis</i> |
| CTCAGGACGAAACGCTGGCGGGCTGCCTAATACATGCAAGTCGAACGCTTCTTTCCCGAGTGCTTGCACTCAAT<br>TGGAAGAGGAGTGGCGGACGGGTGAGTAACACGTGGGTAACTACCCATCAGAGGGGGATAACACTTGGAAC<br>AGGTGCTAATACCGCATAACAGTTTATGCCGCATGGCATAAGAGTGAAAGGCGCTTTCGGGTGTCGCTGATGGAT<br>GGACCCGCGGTGCATTAGCTAGTTGGTGAGGTAACGGCTCACCAGGCCACGATGCATAGCCGACCTGAGAGGGT<br>GATCGGCCACACTGGGACTGAGACACGGCCCAGACTCCTACGGGAGGCAGCAGTAGGGAATCTTCGGCAATGGA<br>CGAAAGTCTGACCGAGCAACGCCGCGTGAGTGAAGAAGGTTTTTCGGATCGTAAACTCTGTTGTTAGAGAAGAAC<br>AAGGACGTTAGTAAGTGAACGTCCCCTGACGGTATCTAACAGAAAGCCACGGCTAACTACGTGCCAGCAGCCGC<br>GGTAATACGTAGGTGGCAAGCGTTGTCCGGATTTATTGGGCGTAAAGCGAGCGCAGGCGGTTTCTTAAGTCTGAT<br>GTGAAAGCCCCGGCTCAACCGGGGAGGGTCAATTGGAAGTGGGAGACTTGAGTGCAGAAGAGGAGAGTGGAAAT<br>TCCATGTGTAGCGGTGAAATGCGTAGATATATGGAGGAACACCACTGGCGAAGGCGGCTCTCTGGTCTGTAAGT<br>ACGCTGAGGCTCGAAAGCGTGGGGAGCAAACAGGATTAGATACCTGGTAGTCCACGCCGTAAACGATGAGTGC<br>TAAGTGTGAGGGGTTTCCGCCCTTCAGTGCTGCAGCAAACGCATTAAGCACTCCGCCTGGGGAGTACGACCGCA<br>AGGTTGAAACTCAAAGGAATTGACGGGGGCCCCGACAAGCGGTGGAGCATGTGGTTTAATTCGAAGCAACGCCA<br>AGAACCTTACCAGGTCTTGACATCCTTTGACCACTCTAGAGATAGAGCTTTCCCTTCGGGGACAAAAGTGACAGGT<br>GGTGCATGGTTGTGCTCAGCTCGTGTGAGATGTTGGGTTAAGTCCCGCAACGAGCGCAACCTTATTGTTAGT<br>TGCCATCATTTAGTTGGGCACTCTAGCGAGACTGCCGGTGACAAAACCGGAGGAAGGTGGGGATGACGTCAAATCA<br>TCATGCCCCCTTATGACCTGGGCTACACACGTGCTACAATGGGAAGTACAACGAGTCGCTAGACCGCGAGGTCATG<br>CAAATCTCTTAAAGCTTCTCTCAGTTCGGATTGCAGGCTGCAACTCGCCTGCATGAAGCCGGAATCGCTAGTAATC<br>GCGGATCAGCACGCCGCGGTGAATACGTTCCCGGGCCTTGTACACACCGCCCGTCACACCAGGAGTGTGTAAC<br>ACCCGAAGTCGCTGAGGTAACCTTTTGGAGCCAGCCGCTAAGGTGGGATAGATGATTGGGGTGAA                                                                                                                                                                                                                                                                                                                                                                                                                                                                                                                                                                                                                                                                                                                                                                                                                                                                                                                                                                                                                                                                                                                                                                                                                                                                                                                                                                                                                                                                                                                                                           | 100         | <i>Enterococcus faecalis</i> |

|                                                                                                                                                                                                                                                                                                                                                                                                                                                                                                                                                                                                                                                                                                                                                                                                                                                                                                                                                                                                                                                                                                                                                                                                                                                                                                                                                                                                                                                                                                                                                            |     |                              |
|------------------------------------------------------------------------------------------------------------------------------------------------------------------------------------------------------------------------------------------------------------------------------------------------------------------------------------------------------------------------------------------------------------------------------------------------------------------------------------------------------------------------------------------------------------------------------------------------------------------------------------------------------------------------------------------------------------------------------------------------------------------------------------------------------------------------------------------------------------------------------------------------------------------------------------------------------------------------------------------------------------------------------------------------------------------------------------------------------------------------------------------------------------------------------------------------------------------------------------------------------------------------------------------------------------------------------------------------------------------------------------------------------------------------------------------------------------------------------------------------------------------------------------------------------------|-----|------------------------------|
| GCACGCAGGCGGACTTTTAGGCTCAGATGTGAACGCTSSCSGCAGGCTTAACACATGCAAGTCGAACGGTAGACA<br>GGAAGAAAGCTTGCTTTCTTTGCTGACGAGTAGGATCGGACGGGTAGCGGAGTAATGCTTGGAATCTGGAGGCT<br>TACTGGAGGGGGAGGTAACCTGCTTGGAATGTACTGCAGCTAATACCGCGTAATCTCTGAGGAGCTAACAGGAGT<br>AGGGACCCTGATTGGCCACCTGCCATAAGATGCAGCCCCAAGTGGGGATTAGGCTAGTTGGTGGGGTAAAGGCCGT<br>ACCAAGCCTGCGATCTCTAGCTGGTCTGGAAGGACTGACGCAAGGTCCACACTGGAAGTGAATTGACACGGTCCA<br>GACTCCTACGGGAGGCAGCATGTGGTGGKKAATATTGCTGCAATGGGGGGAACCTTACCTAGACTTGACAGCCAG<br>TGCCGCGTGCAATGATGAGAATGTGCCTTCGGGTTGTAAAGTYTCTTTCGGTAGATGAGGAAGGGATGTTGTAA<br>TCGAGATGTGCATCATTGACGTTAATTACAGCAACGAGAGCACCGGCTAACCTCCGTTGCCAGCGATTAGCCGTC<br>GGTAACTCAACGGAGGGTGCAGCGTTAATCTGGAATAAGCTGGGGATGACGTAAAGTCATCATGGCCCTTACGA<br>GCAGGGCTACACACGGAKRCTTTTAAGGTGCATACAGAGTGTCTGAGAATCCCCGAGCTTGAGCGAATCTTGGGAA<br>TTGCATTTAGTACGGATGGGAGTCTGAGAGTCGACTTTAGGGAGGGGTAGAATTCCACGTGTAGCGGTGAAATG<br>CGTAGAGATGTTGGAGTGAATACGTTTGAAGGCCTTGAAGGCAGCGCCCGTCACACCATGGGAGTGGGTTGTACC<br>AGAAGTAGATAGCTTAACCTTCGGGAGGGCGTTTACCACGGTATGATTCATGACTGGGGTGAAGTCGT                                                                                                                                                                                                                                                                                                                                                                                                                                                                                                     |     | <i>Pasteurella multocida</i> |
| CTCAGATTGAACGCTGGCGGCATGCTTTACACATGCAAGTCGGACGGCAGCACAAAGAAGCTTGCTTCTTGGGTG<br>GCGAGTGGCGAACGGGTGAGTAACGCATCGGAACGTACCGAGTAGTGGGGGATAACTGTCCGAAAGGATGGCTA<br>ATACCGCATACGCTTTGAGAAGGAAAGCGGGGGATCTTCGGACCTCGCGCTATTCGAGCGGCCGATGTCTGATTA<br>GCTGGTTGGTGGGGTAAAGGCCTACCAAGGCGAGCATCAGTAGCGGGTCTGAGAGGATGATCCGCCACACTGGG<br>ACTGAGACACGGCCAGACTCCTACGGGAGGCAGCAGTGGGGAATTTTGGACAATGGGCGCAAGCCTGATCCAG<br>CCATGCCGCGTGTCTGAAGAAGGCCTTCGGGTTGTAAAGGACTTTTGTGAGGGAAGAAAAGCTTGAGGCTAATAC<br>CCTTGAGTGATGACGGTACCTGAAGAATAAGCACCGGCTAACTACGTGCCAGCAGCCGCGTAATACGTAGGGTG<br>CGAGCGTTAATCGGAATTACTGGGCGTAAAGCGGGCGCAGACGGTTACTTAAGTCAGATGTGAAATCCCCGGGCT<br>CAACCTGGGAACTGCGTTTGAAACTGGGTAGCTAGAGTATGTCAGAGGGGGGTAGAATTCCACGTGTAGCAGTGA<br>AATGCGTAGAGATGTGGAGGAATACCGATGGCGAAGGCAGCCCCCTGGGATAATACTGACGTTTCATGCCCCAAA<br>GCGTGGGTAGCAAACAGGATTAGATAACCCTGGTAGTCCACGCCCTAAACGATGTCAATTAGCTGTTGGGGCACTT<br>GATGCCTTAGTAGCGTAGCTAACGCGTGAAATTGACCGCTTGGGGAGTACGGTCGCAAGATTAAAACTCAAAGGA<br>ATTGACGGGGACCCGCACAAGCGGTGGATGATGTGGATTAATTCGATGCAACGCGAAGAACCCTTACCTGGTCTTG<br>ACATGTACGGAATCCTCCAGAGACGGAGGAGTGCCTTCGGGAGCCGTAACACAGGTGCTGCATGGCTGTCGTCAG<br>CTCGTGTGCTGAGATGTTGGGTAAAGTCCCGCAACGAGCGCAACCCTTGTCAATTAGTTGCCATCATTAAAGTTGGGC<br>ACTCTAATGAGACTGCCGTTGACAAGCCGGAGGAAGGTGGGGATGACGTCAAGTCCCTCATGGCCCTTATGACCAG<br>GGCTTCACACGTGCATACAATGGTTCGGTACAGAGGGTAGCCAAGCCGCGAGGTGGAGCCAATCCCACAAAACCGA<br>TCGTAGTCCGATTGCACTCTGCAACTCGAGTGCATGAAGTCGGAATCGCTAGTAATCGCAGGTCAGCATACTGC<br>GGTGAATACGTTCCCGGGTCTTGTACACACCGCCCGTCACACCATGGGAGTGGGGGATACCAGAAGTAGGTAGGG | 100 | <i>Neisseria dumasiana</i>   |

|                                                                                                                                                                                                                                                                                                                                                                                                                                                                                                                                                                                                                                                                                                                                                                                                                                                                                                                                                                                                                                                                                                                                                                                                                                                                                                                                                                                                                                                                                                                                                                                                                                                                                                                                                                                                                                                                                                                                                                                                                                                                                                                                                                                                                                                                                                                                                                                                                                                                                                                                                                                                                                                                                                                                                                                                                                                                                                                                                                                                                                                                                                                                                                  |       |                              |
|------------------------------------------------------------------------------------------------------------------------------------------------------------------------------------------------------------------------------------------------------------------------------------------------------------------------------------------------------------------------------------------------------------------------------------------------------------------------------------------------------------------------------------------------------------------------------------------------------------------------------------------------------------------------------------------------------------------------------------------------------------------------------------------------------------------------------------------------------------------------------------------------------------------------------------------------------------------------------------------------------------------------------------------------------------------------------------------------------------------------------------------------------------------------------------------------------------------------------------------------------------------------------------------------------------------------------------------------------------------------------------------------------------------------------------------------------------------------------------------------------------------------------------------------------------------------------------------------------------------------------------------------------------------------------------------------------------------------------------------------------------------------------------------------------------------------------------------------------------------------------------------------------------------------------------------------------------------------------------------------------------------------------------------------------------------------------------------------------------------------------------------------------------------------------------------------------------------------------------------------------------------------------------------------------------------------------------------------------------------------------------------------------------------------------------------------------------------------------------------------------------------------------------------------------------------------------------------------------------------------------------------------------------------------------------------------------------------------------------------------------------------------------------------------------------------------------------------------------------------------------------------------------------------------------------------------------------------------------------------------------------------------------------------------------------------------------------------------------------------------------------------------------------------|-------|------------------------------|
| <p>CTCAGATTGAACGCTGGCGGCAGGCCTAACACATGCAAGTCGAACGGTAACAGGAAGCAGCTTGCTTCTTTGCTG<br/>ACGAGTGGCGGACGGGTGAGTAATGTCTGGGAACTGCCTGATGGAGGGGGATAACTACTGGAAACGGTAGCTA<br/>ATACCGCATAACGTCGCAAGACCAAAGAGGGGGACCTTCGGGCCCTCTTGCCATCGGATGTGCCCAGATGGGATTA<br/>GCTAGTAGGTGGGGTAACGGCTCACCTAGGCGACGATCCCTAGCTGGTCTGAGAGGATGACCAGCCACACTGGAA<br/>CTGAGACACGGTCCAGACTCCTACGGGAGGCAGCAGTGGGGAATATTGCACAATGGGCGCAAGCCTGATGCAGC<br/>CATGCCGCGTGTATGAAGAAGGCCTTCGGGTGTAAAAGTACTTTACGCGGGGAGGAAGGGAGTAAAGTTAATACC<br/>TTTGCTCATTGACGTTACCCGCAGAAGAAGCACCGGCTAACTCCGTGCCAGCAGCCGCGGTAATACGGAGGGTGC<br/>AAGCGTTAATCGGAATTACTGGGCGTAAAGCGCACGCAGGCGGTTTGTAAAGTCAGATGTGAAATCCCCGGGCTC<br/>AACCTGGGAACTGCATCTGATACTGGCAAGCTTGAGTCTCGTAGAGGGGGGTAGAATTCCAGGTGTAGCGGTGAA<br/>ATGCGTAGAGATCTGGAGGAATACCGGTGGCGAAGGCGGGCCCCCTGGACGAAGACTGACGCTCAGGTGCGAAAG<br/>CGTGGGGAGCAAACAGGATTAGATACCCTGGTAGTCCACGCCGTAAACGATGTGCAGTTGGAGGTTGTGCCCTTG<br/>AGGCGTGGCTTCCGGAGCTAACGCGTTAAGTCGACCGCCTGGGGAGTACGGCCGAAGGTTAAAACTCAAATGAA<br/>TTGACGGGGGCCCGCACAAAGCGGTGGAGCATGTGGTTTAAATTCGATGCAACGCGAAGAACCTTACCTGGTCTTGA<br/>CATCCACGGAAGTTTTCAGAGATGAAAAGGTGCCTTCGGGAACCGTGAGACAGGTGCTGCATGGCTGTCGTCAGC<br/>TCGTGTGTGAAATGTTGGGTTAAGTCCCGCAACGAGCGCAACCCTTATCCTTTGTTGCCAGCGGTCCGGCCGGGA<br/>ACTCAAAGGAGACTGCCAGTGATAAACTGGAGGAAGGTGGGGATGACGTCAAGTCATCATGGCCCTTACGACCA<br/>GGGCTACACACGTGCTACAATGGCGCATACAAAGAGAAGCGACCTCGCGAGAGCAAGCGGACCTCATAAAGTGC<br/>GTCGTAGTCCGGATTGGAGTCTGCAACTCGACTCCATGAAGTCGGAATCGCTAGTAATCGTGGATCAGAATGCCA<br/>CGGTGAATACGTTCCCGGGCCTTGTTACACACCGCCCCGTACACCATGGGAGTGGGTTGCAAAAAGAAGTAGGTAGC</p> <p>CTCAGATTGAACGCTGGCGGCAGGCCTAACACATGCAAGTCGAGCGGTAGCACAGAGAGCTTGCTCTCGGGTGAC<br/>GAGCGGGCGGACGGGTGAGTAATGTCTGGGAACTGCCTGATGGAGGGGGATAACTACTGGAAACGGTAGCTAAT<br/>ACCGCATAATGTGCAAGACCAAAGTGGGGGACCTTCGGGCCCTCATGCCATCAGATGTGCCCAGATGGGATTAGC<br/>TAGTAGGTGGGGTAACGGCTCACCTAGGCGACGATCCCTAGCTGGTCTGAGAGGATGACCAGCCACACTGGA<br/>GAGACACGGTCCAGACTCCTACGGGAGGCAGCAGTGGGGAATATTGCACAATGGGCGCAAGCCTGATGCAGCCA<br/>TGCCGCGTGTGTGAAGAAGGCCTTCGGGTGTAAAAGCACTTTCAGCGGGGAGGAAGGCGATAAGGTTAATAACCT<br/>TGGCGATTGACGTTACCCGCAGAAGAAGCACCGGCTAACTCCGTGCCAGCAGCCGCGGTAATACGGAGGGTGCA<br/>AGCGTTAATCGGAATTACTGGGCGTAAAGCGCACGCAGGCGGTCTGTCAAGTCGGATGTGAAATCCCCGGGCTCA<br/>ACCTGGGAACTGCATTGAAAACCTGGCAGGCTAGAGTCTTGTAGAGGGGGGTAGAATTCCAGGTGTAGCGGTGAAA<br/>TGCGTAGAGATCTGGAGGAATACCGGTGGCGAAGGCGGGCCCCCTGGACAAAGACTGACGCTCAGGTGCGAAAGC<br/>GTGGGGAGCAAACAGGATTAGATACCCTGGTAGTCCACGCCGTAAACGATGTCGATTGGAGGTTGTGCCCTTGA<br/>GGCGTGGCTTCCGGAGCTAACGCGTTAAATCGACCGCCTGGGGAGTACGGCCGAAGGTTAAAACTCAAATGAAT<br/>TGACGGGGGGCCGCACAAGCGGTGGAGCATGTGGTTTAAATTCGATGCAACGCGAAGAACCTTACCTGGTCTTGAC<br/>ATCCACAGAACTTTCCAGAGATGGATTGGTGCCCTTCGGGAACTGTGAGACAGGTGCTGCATGGCTGTCGTCAGCT<br/>CGTGTGTGAAATGTTGGGTTAAGTCCCGCAACGAGCGCAACCCTTATCCTTTGTTGCCAGCGGTTTCGGCCGGGA<br/>CTCAAAGGAGACTGCCAGTGATAAACTGGAGGAAGGTGGGGATGACGTCAAGTCATCATGGCCCTTACGACCAG<br/>GGCTACACACGTGCTACAAATGGCATATACAAAGAGAAGCGACCTCGCGAGAGCAAGCGGACCTCATAAAGTATG<br/>TCGTAGTCCGGATTGGAGTCTGCAACTCGACTCCATGAAGTCGGAATCGCTAGTAATCGTAGATCAGAATGCTAC<br/>GGTGAATACGTTCCCGGGCCTTGTTACACACCGCCCCGTACACCATGGGAGTGGGTTGCAAAAAGAAGTAGGTAGCT</p> | 99.86 | <i>Escherichia coli</i>      |
| <p>CTCAGATTGAACGCTGGCGGCAGGCCTAACACATGCAAGTCGAGCGGTAGCACAGAGAGCTTGCTCTCGGGTGAC<br/>GAGCGGGCGGACGGGTGAGTAATGTCTGGGAACTGCCTGATGGAGGGGGATAACTACTGGAAACGGTAGCTAAT<br/>ACCGCATAATGTGCAAGACCAAAGTGGGGGACCTTCGGGCCCTCATGCCATCAGATGTGCCCAGATGGGATTAGC<br/>TAGTAGGTGGGGTAACGGCTCACCTAGGCGACGATCCCTAGCTGGTCTGAGAGGATGACCAGCCACACTGGA<br/>GAGACACGGTCCAGACTCCTACGGGAGGCAGCAGTGGGGAATATTGCACAATGGGCGCAAGCCTGATGCAGCCA<br/>TGCCGCGTGTGTGAAGAAGGCCTTCGGGTGTAAAAGCACTTTCAGCGGGGAGGAAGGCGATAAGGTTAATAACCT<br/>TGGCGATTGACGTTACCCGCAGAAGAAGCACCGGCTAACTCCGTGCCAGCAGCCGCGGTAATACGGAGGGTGCA<br/>AGCGTTAATCGGAATTACTGGGCGTAAAGCGCACGCAGGCGGTCTGTCAAGTCGGATGTGAAATCCCCGGGCTCA<br/>ACCTGGGAACTGCATTGAAAACCTGGCAGGCTAGAGTCTTGTAGAGGGGGGTAGAATTCCAGGTGTAGCGGTGAAA<br/>TGCGTAGAGATCTGGAGGAATACCGGTGGCGAAGGCGGGCCCCCTGGACAAAGACTGACGCTCAGGTGCGAAAGC<br/>GTGGGGAGCAAACAGGATTAGATACCCTGGTAGTCCACGCCGTAAACGATGTCGATTGGAGGTTGTGCCCTTGA<br/>GGCGTGGCTTCCGGAGCTAACGCGTTAAATCGACCGCCTGGGGAGTACGGCCGAAGGTTAAAACTCAAATGAAT<br/>TGACGGGGGGCCGCACAAGCGGTGGAGCATGTGGTTTAAATTCGATGCAACGCGAAGAACCTTACCTGGTCTTGAC<br/>ATCCACAGAACTTTCCAGAGATGGATTGGTGCCCTTCGGGAACTGTGAGACAGGTGCTGCATGGCTGTCGTCAGCT<br/>CGTGTGTGAAATGTTGGGTTAAGTCCCGCAACGAGCGCAACCCTTATCCTTTGTTGCCAGCGGTTTCGGCCGGGA<br/>CTCAAAGGAGACTGCCAGTGATAAACTGGAGGAAGGTGGGGATGACGTCAAGTCATCATGGCCCTTACGACCAG<br/>GGCTACACACGTGCTACAAATGGCATATACAAAGAGAAGCGACCTCGCGAGAGCAAGCGGACCTCATAAAGTATG<br/>TCGTAGTCCGGATTGGAGTCTGCAACTCGACTCCATGAAGTCGGAATCGCTAGTAATCGTAGATCAGAATGCTAC<br/>GGTGAATACGTTCCCGGGCCTTGTTACACACCGCCCCGTACACCATGGGAGTGGGTTGCAAAAAGAAGTAGGTAGCT</p>                                                                                                                                                                                                                                                                                                                                                                                                                                                                                                                                                                                                                                                                                                                                                                                                                                                                                                                                                                                                                                                                                                                                                                                                                                                                                                                                                                                                                                                                                                                                                                                   | 100   | <i>Klebsiella pneumoniae</i> |

|                                                                                                                                                                                                                                                                                                                                                                                                                                                                                                                                                                                                                                                                                                                                                                                                                                                                                                                                                                                                                                                                                                                                                                                                                                                                                                                                                                                                                                                                                                                                                                                                                                                                                                                                                                                                                                                                                                                                                                                                                                                                                                                                                                                                                                                                                                                                                                                                                                                                                                                                                                                                                                                                                                                                                                                                                                                                                                                                                                                                                                                                                                                                                                                        |       |                                        |
|----------------------------------------------------------------------------------------------------------------------------------------------------------------------------------------------------------------------------------------------------------------------------------------------------------------------------------------------------------------------------------------------------------------------------------------------------------------------------------------------------------------------------------------------------------------------------------------------------------------------------------------------------------------------------------------------------------------------------------------------------------------------------------------------------------------------------------------------------------------------------------------------------------------------------------------------------------------------------------------------------------------------------------------------------------------------------------------------------------------------------------------------------------------------------------------------------------------------------------------------------------------------------------------------------------------------------------------------------------------------------------------------------------------------------------------------------------------------------------------------------------------------------------------------------------------------------------------------------------------------------------------------------------------------------------------------------------------------------------------------------------------------------------------------------------------------------------------------------------------------------------------------------------------------------------------------------------------------------------------------------------------------------------------------------------------------------------------------------------------------------------------------------------------------------------------------------------------------------------------------------------------------------------------------------------------------------------------------------------------------------------------------------------------------------------------------------------------------------------------------------------------------------------------------------------------------------------------------------------------------------------------------------------------------------------------------------------------------------------------------------------------------------------------------------------------------------------------------------------------------------------------------------------------------------------------------------------------------------------------------------------------------------------------------------------------------------------------------------------------------------------------------------------------------------------------|-------|----------------------------------------|
| <p>GGCTCAGGATGAACGCTGGCGGCGTGCCTAATACATGCAAGTCGAGCGAACAGATAAGGAGCTTGCTCCTTTGAC<br/>GTTAGCGGCGGACGGGTGAGTAACACGTGGGTAACTACCTATAAGACTGGAATAACTCCGGGAAACCGGGGCT<br/>AATGCCGGATAACATGTTGAACCGCATGGTTCTACAGTGAAAGACGGTCTTGCTGTCACTTATAGATGGACCCGC<br/>GCCGTATTAGCTAGTTGGTGGGGTAACGGCCTACCAAGGCGACGATACGTAGCCGACCTGAGAGGGTGATCGGCC<br/>ACACTGGAAC TGAGACACGGTCCAGACTCCTACGGGAGGCAGCAGTAGGGAATCTTCCGCAATGGGCGAAAGCC<br/>TGACGGAGCAACGCCGCGTGAGTGATGAAGGCTTTCGGATCGTAAAGCTCTGTTGTTAGGGAAGAACAAATGTGT<br/>AAGTAAC TGTCACATCTTGACGGTACCTAACCAGAAAGCCACGGCTAACTACGTGCCAGCAGCCGCGGTAATAC<br/>GTAGGTGGCAAGCGTTATCCGGAATTATTGGGCGTAAAGCGCGCTAGGCGGTTTTTTAAGTCTGATGTGAAAGC<br/>CCACGGCTCAACCGTGGAGGGTCATTGGAACTGGAAAAC TTGAGTGCAGAAGAGGAAAAGTGGAATTCATGTGT<br/>AGCGGTGAAAATGCGCAGAGATATGGAGGAACACCAAGTGGCGAAGGCGGCTTTCTGGTCTGCAACTGACGCTGATG<br/>TGCGAAAGCGTGGGGATCAAACAGGATTAGATACCCTGGTAGTCCACGCCGTAAACGATGAGTGCTAAGTGTTAG<br/>GGGGTTTTCCGCCCTTAGTGCTGCAGCTAACGCATTAAGCACTCCGCTGGGGAGTACGGTCGCAAGACTGAAAC<br/>TCAAAGGAATTGACGGGGACCCGCACAAGCGGTGGAGCATGTGGTTTAATTCGAAGCAACGCGAAGAACCTTAC<br/>CAAATCTTGACATCCTTTGACCGTCTAGAGATAGAGTTTTCCTCTTCGAGGACAAAGTGACAGGTGGTGCATGG<br/>TTGTCGTCAGCTCGTGCTGAGATGTTGGGTAAAGTCCCGCAACGAGCGCAACCCCTTGAAC TTAGTTGCCATCAT<br/>TCAGTTGGGCACTCTAAGTTGACTGCCGGTGACAAACCGGAGGAAGGTGGGGATGACGTCAAATCATCATGCCCC<br/>TTATGATTTGGGCTACACACGTGCTACAATGGACAATACAAAGGGCAGCGAAACCGCAGGTCAAGCAAATCCCA<br/>TAAAGTTGTCTCTCAGTTTCGGATTGTAGTCTGCAACTCGACTGACATGAAGCTGGAATCGCTAGTAATCGTAGATCAG<br/>CATGCTACGGTGAATACGTTCCCGGGTCTTGTAACACCGCCCGTCACACCACGAGAGTTTGTAACACCCGAAGC<br/>CTCAGGACGAACGCTGGCGGCGTGCTTAACACATGCAAGTCGAACGGAAAGGCCATGCTTGCGGGGTGCTCGAGT<br/>GGCGAACGGGTGAGTAACACGTGGGTGATCTGCCTCGTACTTCGGGATAAGCTTGGGAAACTGGGTCTAATACCG<br/>GATAGGACCATCATTTAGTGTTGGTGGTGGAAGTTTTCGGTGCGAGATGAGCCCCGCGGCCTATCAGCTTGTTG<br/>GTGGGGTAATGGCCTACCAAGGCGTCGACGGGTAGCCGGCCTGAGAGGGTGGACGGCCACATTGGGACTGAGAT<br/>ACGGCCCAGACTCCTACGGGAGGCAGCAGTGGGGAATATTGCACAATGGGCGCAAGCCTGATGCAGCGACGCCG<br/>CGTGGGGGATGACGGCCTTCGGGTTGTAAACCTCTTTCGGTAGGGACGAAGCCTTTTGGTGACGGTACCTGTAGA<br/>AGAAGCACCGGCTAACTACGTGCCAGCAGCCGCGTAATACGTAGGGTGCGAGCGTTGTCCGGAATTACTGGGCG<br/>TAAAGAGCTCGTAGGTGGTTTGTGCGTCTGTGAAATACCGGGGCTTAACTTCGGGGTTGCAGGCGATACGG<br/>GCATAACTGGAGTGCTGTAGGGGAGACTGGAATTCCTGGTGTAGCGGTGGAATGCGCAGATATCAGGAGGAACAC<br/>CGATGGCGAAGGCAGGTCTCTGGGCAGTAAC TGACGCTGAGGAGCGAAAGCATGGGAGCGAACAGGATTAGAT<br/>ACCCTGGTAGTCCATGCTGTAAACGGTGGGCGCTAGGTGTAGGGGTCTTCACGATTCTGTGCCGTAGCTAACGC<br/>ATTAAGCGCCCCGCCTGGGGAGTACGGCCGCAAGGCTAAAACTCAAAGGAATTGACGGGGGCCCGCACAAAGCGG<br/>CGGAGCATGTGGATTAATTCGATGCAACGCGAAGAACCTTACCTGGGCTTGACATACACCAGATCGCTGCAGAGA<br/>TGTAAGTTCCCTTTGTGGTTGGTGTACAGGTGGTGCATGGTTGTCTGTCAGCTCGTGTCTGAGATGTTGGGTTAAGT<br/>CCC GCAACGAGCGCAACCC TTGTCTTATGTTGCCAGCACGTGGTGGTGGGGACTCATGAGAGACTGCCGGGGTTA<br/>ACTCGGAGGAAGGTGGGGATGACGTCAAATCATCATGCCCTTACGTCCAGGGCTTCACACATGCTACAATGGTC<br/>GGTACAACGCGTTGCGAGCCTGTGAGGGTGAGCGAATCGTGAAAGCCGGCCTCAGTTCGGATTGGGGTCTGCAA<br/>CTCGACCCCATGAAGTCGGAGTCGCTAGTAATCGCAGATCAGCAACGCTGCGGTGAATACGTTCCCGGGCCTTGT<br/>ACACACCGCCCGTCACGTCATGAAAGTTGGTAACACCCGAAGCCCATGGCCTAACCCCGTTGTGGAGGGAGTGGT<br/>CTAAAGTGGGATAGTCGATAGTGA</p> | 100   | <i>Staphylococcus pseudintermedius</i> |
| <p>CTCAGGACGAACGCTGGCGGCGTGCTTAACACATGCAAGTCGAACGGAAAGGCCATGCTTGCGGGGTGCTCGAGT<br/>GGCGAACGGGTGAGTAACACGTGGGTGATCTGCCTCGTACTTCGGGATAAGCTTGGGAAACTGGGTCTAATACCG<br/>GATAGGACCATCATTTAGTGTTGGTGGTGGAAGTTTTCGGTGCGAGATGAGCCCCGCGGCCTATCAGCTTGTTG<br/>GTGGGGTAATGGCCTACCAAGGCGTCGACGGGTAGCCGGCCTGAGAGGGTGGACGGCCACATTGGGACTGAGAT<br/>ACGGCCCAGACTCCTACGGGAGGCAGCAGTGGGGAATATTGCACAATGGGCGCAAGCCTGATGCAGCGACGCCG<br/>CGTGGGGGATGACGGCCTTCGGGTTGTAAACCTCTTTCGGTAGGGACGAAGCCTTTTGGTGACGGTACCTGTAGA<br/>AGAAGCACCGGCTAACTACGTGCCAGCAGCCGCGTAATACGTAGGGTGCGAGCGTTGTCCGGAATTACTGGGCG<br/>TAAAGAGCTCGTAGGTGGTTTGTGCGTCTGTGAAATACCGGGGCTTAACTTCGGGGTTGCAGGCGATACGG<br/>GCATAACTGGAGTGCTGTAGGGGAGACTGGAATTCCTGGTGTAGCGGTGGAATGCGCAGATATCAGGAGGAACAC<br/>CGATGGCGAAGGCAGGTCTCTGGGCAGTAAC TGACGCTGAGGAGCGAAAGCATGGGAGCGAACAGGATTAGAT<br/>ACCCTGGTAGTCCATGCTGTAAACGGTGGGCGCTAGGTGTAGGGGTCTTCACGATTCTGTGCCGTAGCTAACGC<br/>ATTAAGCGCCCCGCCTGGGGAGTACGGCCGCAAGGCTAAAACTCAAAGGAATTGACGGGGGCCCGCACAAAGCGG<br/>CGGAGCATGTGGATTAATTCGATGCAACGCGAAGAACCTTACCTGGGCTTGACATACACCAGATCGCTGCAGAGA<br/>TGTAAGTTCCCTTTGTGGTTGGTGTACAGGTGGTGCATGGTTGTCTGTCAGCTCGTGTCTGAGATGTTGGGTTAAGT<br/>CCC GCAACGAGCGCAACCC TTGTCTTATGTTGCCAGCACGTGGTGGTGGGGACTCATGAGAGACTGCCGGGGTTA<br/>ACTCGGAGGAAGGTGGGGATGACGTCAAATCATCATGCCCTTACGTCCAGGGCTTCACACATGCTACAATGGTC<br/>GGTACAACGCGTTGCGAGCCTGTGAGGGTGAGCGAATCGTGAAAGCCGGCCTCAGTTCGGATTGGGGTCTGCAA<br/>CTCGACCCCATGAAGTCGGAGTCGCTAGTAATCGCAGATCAGCAACGCTGCGGTGAATACGTTCCCGGGCCTTGT<br/>ACACACCGCCCGTCACGTCATGAAAGTTGGTAACACCCGAAGCCCATGGCCTAACCCCGTTGTGGAGGGAGTGGT<br/>CTAAAGTGGGATAGTCGATAGTGA</p>                                                                                                                                                                                                                                                                                                                                                                                                                                                                                                                                                                                                                                                                                                                                                                                                                                                                                                                                                                                                                                                                                                                                                                                                                                                                                                                                                                                                                                                                                                                                                                                | 98.62 | <i>Corynebacterium mustelae</i>        |

|                                                                                                                                                                                                                                                                                                                                                                                                                                                                                                                                                                                                                                                                                                                                                                                                                                                                                                                                                                                                                                                                                                                                                                                                                                                                                                                                                                                                                                                                                                                                                                                                                                                                                                                                                                                                                                                                                                                                                                                                                                                                                                                                                                                                                                                                                                                                                                                                                                                                                                                                                                                                                                                                                                                                                                                                                                                                                                                                                                                                                                                                                                                                                                             |     |                               |
|-----------------------------------------------------------------------------------------------------------------------------------------------------------------------------------------------------------------------------------------------------------------------------------------------------------------------------------------------------------------------------------------------------------------------------------------------------------------------------------------------------------------------------------------------------------------------------------------------------------------------------------------------------------------------------------------------------------------------------------------------------------------------------------------------------------------------------------------------------------------------------------------------------------------------------------------------------------------------------------------------------------------------------------------------------------------------------------------------------------------------------------------------------------------------------------------------------------------------------------------------------------------------------------------------------------------------------------------------------------------------------------------------------------------------------------------------------------------------------------------------------------------------------------------------------------------------------------------------------------------------------------------------------------------------------------------------------------------------------------------------------------------------------------------------------------------------------------------------------------------------------------------------------------------------------------------------------------------------------------------------------------------------------------------------------------------------------------------------------------------------------------------------------------------------------------------------------------------------------------------------------------------------------------------------------------------------------------------------------------------------------------------------------------------------------------------------------------------------------------------------------------------------------------------------------------------------------------------------------------------------------------------------------------------------------------------------------------------------------------------------------------------------------------------------------------------------------------------------------------------------------------------------------------------------------------------------------------------------------------------------------------------------------------------------------------------------------------------------------------------------------------------------------------------------------|-----|-------------------------------|
| <p>CTCAGATTGAACGCTGGCGGCAGGCCTAACACATGCAAGTCGAGCGGATGAAGGGAGCTTGCTCCTGGATTACAG<br/>GGCGGACGGGTGAGTAATGCCTAGGAATCTGCCTGGTAGTGGGGGATAACGTCCGGAAACGGGCGCTAATACCG<br/>CATACGTCCTGAGGGAGAAAAGTGGGGGATCTTCGGACCTCACGCTATCAGATGAGCCTAGGTCTGGATTAGCTAGT<br/>TGGTGGGGTAAAGGCCTACCAAGGCACGATCCGTAACCTGGTCTGAGAGGATGATCAGTCACACTGGAAGTGA<br/>CACGGTCCAGACTCCTACGGGAGGCAGCAGTGGGGAATATTGGACAATGGGCGAAAGCCTGATCCAGCCATGCC<br/>GCGTGTGTGAAGAAGGTCTTCGGATTGTAAAGCACTTTAAGTTGGGAGGAAGGGCAGTAAGTTAATACCTTGCTG<br/>TTTTGACGTTACCAACAGAATAAGCACCGGCTAACCTCGTGCCAGCAGCCGCGGTAATACGAAGGGTGCAAGCGT<br/>TAATCGGAATTACTGGGCGTAAAGCGCGCGTAGGTGGTTCAGCAAGTTGGATGTGAAATCCCCGGGCTCAACCTG<br/>GGAAGTGCATCCAAAACACTACTGAGCTAGAGTACGGTAGAGGGTGGTGGAATTTCTGTGTAGCGGTGAAATGCGT<br/>AGATATAGGAAGGAACACCAGTGGCGAAGGCGACACCTGGACTGATACTGACACTGAGGTGCGAAAGCGTGCGG<br/>GAGCAAACAGGATTAGATACCCTGGTAGTCCACGCCGTAACGATGTCGACTAGCCGTTGGGATCCTTGAGATCT<br/>TAGTGGCGCAGCTAACCGGATAAGTCGACCGCCTGGGGAGTACGGCCGCAAGGTTAAAACCTCAAATGAATTGAC<br/>GGGGGCCCCGACAAGCGGTGGAGCATGTGGTTTAATTGCAAGCAACGCGAAGAACCTTACCTGGCCTTGACATGC<br/>TGAGAACTTTCCAGAGATGGATTGGTGCCTTCGGGAACTCAGACACAGGTGCTGCATGGCTGTCGTCAGCTCGTGT<br/>CGTGAGATGTTGGGTAAAGTCCCCTAACGAGCGCAACCCCTTGTCCTTAGTTACCAGCACCTCGGGTGGGCACTCTA<br/>AGGAGACTGCCGGTGACAAACCGGAGGAAGGTGGGGATGACGTCAAGTCATCATGGCCCTTACGGCCAGGGCTA<br/>CACAGTGTCTACAATGGTCCGTACAAAGGGTTGCCAAGCCGCGAGGTGGAGCTAATCCCATAAAACCGATCGTAG<br/>TCCGGATCGCAGTCTGCAACTCGACTGCGTGAAGTCGGAATCGCTAGTAATCGTGAATCAGAATGTCACGGTGAA<br/><u>TACGTTCCCGGGCCTTGCTACACACCGCCCGTCACACCATGGGAGTGGGTTGCTCCAGAAGTAGCTAGTCTAACCG</u><br/>CTCAGATTGAACGCTGGCGGCAGGCCTAACACATGCAAGTCGAACGGTAACAGGAATCAGCTTGCTGATTGCTG<br/>ACGAGTGGCGGACGGGTGAGTAATGTCTGGGAACTGCCTGATGGAGGGGGATAACTACTGGAACCGGTAGCTA<br/>ATACCGCATAACGTCGCAAGACCAAAGAGGGGGACCTTCGGGCCCTCTTGCCATCGGATGTGCCCAGATGGGATTA<br/>GCTAGTAGGTGGGGTAACGGCTCACCTAGGCGACGATCCCTAGCTGGTCTGAGAGGATGACCAGCCACACTGGAA<br/>CTGAGACACGGTCCAGACTCCTACGGGAGGCAGCAGTGGGGAATATTGCACAATGGGCGCAAGCCTGATGCAGC<br/>CATGCCGCGTGTATGAAGAAGGCCTTCGGGTTGTAAAGTACTTTTCAGCGGGGAGGAAGGGAGTAAAGTTAATACC<br/>TTTGCTCATTGACGTTACCCGCAGAAGAAGCACCGGCTAACTCCGTGCCAGCAGCCGCGGTAATACGGAGGGTGC<br/>AAGCGTTAATCGGAATTACTGGGCGTAAAGCGCACGCAGGCGGTTTGTTAAGTCAGATGTGAAATCCCCGGGCTC<br/>AACCTGGGAACTGCATCTGATACTGGCAAGCTTGAGTCTCGTAGAGGGGGGTAGAATTCCAGGTGTAGCGGTGAA<br/>ATGCGTAGAGATCTGGAGGAATACCGGTGGCGAAGGCGGCCCCCTGGACGAAGACTGACGCTCAGGTGCGAAAG<br/>CGTGGGGAGCAAAACAGGATTAGATACCCTGGTAGTCCACGCCGTAAACGATGTGCACTTGGAGGTTGTGCCCTTG<br/>AGGCGTGGCTTCCGGAGCTAACGCGTTAAGTCGACCGCCTGGGGAGTACGGCCGCAAGGTTAAAACCTCAAATGAA<br/>TTGACGGGGGCCCCGCACAAGCGGTGGAGCATGTGGTTTAATTCGATGCAACGCGAAGAACCTTACCTGGTCTTGA<br/>CATCCACAGAACCTTTCCAGAGATGGATTGGTGCCTTCGGGAACTGTGAGACAGGTGCTGCATGGCTGTCGTCAGC<br/>TCGTGTTGTGAAATGTTGGGTTAAGTCCCGCAACGAGCGCAACCCCTTATCCTTTGTTGCCAGCGGTCCGGCCGGGA<br/>ACTCAAAGGAGACTGCCAGTGATAAACTGGAGGAAGGTGGGGATGACGTCAAGTCATCATGGCCCTTACGACCA<br/>GGGCTACACAGTGTCTACAATGGCGCATACAAAGAGAAGCGACCTCGCGAGAGCAAGCGGACCTCATAAAGTGC<br/>GTCGTAGTCCGGATTGGAGTCTGCAACTCGACTCCATGAAGTCGGAATCGCTAGTAATCGTGGATCAGAATGCCA<br/>CGGTGAATACGTTCCCGGGCCTTGCTACACACCGCCCGTCACACCATGGGAGTGGGTTGCAAAAGAAGTAGGTAGC</p> | 100 | <i>Pseudomonas aeruginosa</i> |
| <p>CTCAGATTGAACGCTGGCGGCAGGCCTAACACATGCAAGTCGAACGGTAACAGGAATCAGCTTGCTGATTGCTG<br/>ACGAGTGGCGGACGGGTGAGTAATGTCTGGGAACTGCCTGATGGAGGGGGATAACTACTGGAACCGGTAGCTA<br/>ATACCGCATAACGTCGCAAGACCAAAGAGGGGGACCTTCGGGCCCTCTTGCCATCGGATGTGCCCAGATGGGATTA<br/>GCTAGTAGGTGGGGTAACGGCTCACCTAGGCGACGATCCCTAGCTGGTCTGAGAGGATGACCAGCCACACTGGAA<br/>CTGAGACACGGTCCAGACTCCTACGGGAGGCAGCAGTGGGGAATATTGCACAATGGGCGCAAGCCTGATGCAGC<br/>CATGCCGCGTGTATGAAGAAGGCCTTCGGGTTGTAAAGTACTTTTCAGCGGGGAGGAAGGGAGTAAAGTTAATACC<br/>TTTGCTCATTGACGTTACCCGCAGAAGAAGCACCGGCTAACTCCGTGCCAGCAGCCGCGGTAATACGGAGGGTGC<br/>AAGCGTTAATCGGAATTACTGGGCGTAAAGCGCACGCAGGCGGTTTGTTAAGTCAGATGTGAAATCCCCGGGCTC<br/>AACCTGGGAACTGCATCTGATACTGGCAAGCTTGAGTCTCGTAGAGGGGGGTAGAATTCCAGGTGTAGCGGTGAA<br/>ATGCGTAGAGATCTGGAGGAATACCGGTGGCGAAGGCGGCCCCCTGGACGAAGACTGACGCTCAGGTGCGAAAG<br/>CGTGGGGAGCAAAACAGGATTAGATACCCTGGTAGTCCACGCCGTAAACGATGTGCACTTGGAGGTTGTGCCCTTG<br/>AGGCGTGGCTTCCGGAGCTAACGCGTTAAGTCGACCGCCTGGGGAGTACGGCCGCAAGGTTAAAACCTCAAATGAA<br/>TTGACGGGGGCCCCGCACAAGCGGTGGAGCATGTGGTTTAATTCGATGCAACGCGAAGAACCTTACCTGGTCTTGA<br/>CATCCACAGAACCTTTCCAGAGATGGATTGGTGCCTTCGGGAACTGTGAGACAGGTGCTGCATGGCTGTCGTCAGC<br/>TCGTGTTGTGAAATGTTGGGTTAAGTCCCGCAACGAGCGCAACCCCTTATCCTTTGTTGCCAGCGGTCCGGCCGGGA<br/>ACTCAAAGGAGACTGCCAGTGATAAACTGGAGGAAGGTGGGGATGACGTCAAGTCATCATGGCCCTTACGACCA<br/>GGGCTACACAGTGTCTACAATGGCGCATACAAAGAGAAGCGACCTCGCGAGAGCAAGCGGACCTCATAAAGTGC<br/>GTCGTAGTCCGGATTGGAGTCTGCAACTCGACTCCATGAAGTCGGAATCGCTAGTAATCGTGGATCAGAATGCCA<br/>CGGTGAATACGTTCCCGGGCCTTGCTACACACCGCCCGTCACACCATGGGAGTGGGTTGCAAAAGAAGTAGGTAGC</p>                                                                                                                                                                                                                                                                                                                                                                                                                                                                                                                                                                                                                                                                                                                                                                                                                                                                                                                                                                                                                                                                                                                                                                                                                                                                                                                                                                                                                                                                                                                                                                                        | 100 | <i>Escherichia coli</i>       |

|                                                                                                                                                                                                                                                                                                                                                                                                                                                                                                                                                                                                                                                                                                                                                                                                                                                                                                                                                                                                                                                                                                                                                                                                                                                                                                                                                                                                                                                                                                                                                                                                                                              |     |                                        |
|----------------------------------------------------------------------------------------------------------------------------------------------------------------------------------------------------------------------------------------------------------------------------------------------------------------------------------------------------------------------------------------------------------------------------------------------------------------------------------------------------------------------------------------------------------------------------------------------------------------------------------------------------------------------------------------------------------------------------------------------------------------------------------------------------------------------------------------------------------------------------------------------------------------------------------------------------------------------------------------------------------------------------------------------------------------------------------------------------------------------------------------------------------------------------------------------------------------------------------------------------------------------------------------------------------------------------------------------------------------------------------------------------------------------------------------------------------------------------------------------------------------------------------------------------------------------------------------------------------------------------------------------|-----|----------------------------------------|
| <p>CTCAGGATGAACGCTGGCGGCGTGCCTAATACATGCAAGTCGAGCGAACAGATAAGGAGCTTGCTCCTTTGACGT<br/> TAGCGGCGGACGGGTGAGTAACACGTGGGTAACTACCTATAAGACTGGAATAACTCCGGGAAACCGGGGCTAA<br/> TGCCGGATAACATGTTGAACCGCATGGTTCTACAGTGAAAGACGGTCTTGCTGTCACTTATAGATGGACCCGCGC<br/> CGTATTAGCTAGTTGGTGGGGTAACGGCCTACCAAGGCGACGATACGTAGCCGACCTGAGAGGGTGATCGGCCAC<br/> ACTGGAACGTAGACACGGTCCAGACTCCTACGGGAGGCAGCAGTAGGGAATCTTCCGCAATGGGCGAAAGCCTG<br/> ACGGAGCAACGCCGCGTGAGTGATGAAGGTCTTCGGATCGTAAAGCTCTGTTGTTAGGGAAGAACAATGTGTAA<br/> GTAACGTGTGCACATCTTGACGGTACCTAACCAGAAAGCCACGGCTAACTACGTGCCAGCAGCCGCGGTAATACGT<br/> AGGTGGCAAGCGTTATCCGGAATTATTGGGCGTAAAGCGCGCGTAGGCGGTTTTTTAAGTCTGATGTGAAAGCCC<br/> ACGGCTCAACCGTGGAGGGTCATTGAAAACCTGGAAAACCTGAGTGCAGAAGAGGAAAGTGGAAATCCATGTGTAG<br/> CGGTGAAATGCGCAGAGATATGGAGGAACACCAGTGGCGAAGGCGGCTTCTGCTCTGCAACTGACGCTGATGTG<br/> CGAAAGCGTGGGGATCAAACAGGATTAGATACCCTGGTAGTCCACGCCGTAACCATGAGTGCTAAGTGTAGGG<br/> GGTTTTCCGCCCTTAGTGCTGCAGCTAACGCATTAAGCACTCCGCCTGGGGAGTACGGTCGCAAGACTGAAAACCTC<br/> AAAGGAATTGACGGGGACCCGCACAAGCGGTGGAGCATGTGGTTTAATTCGAAGCAACGCGAAGAACCCTTACCA<br/> AATCTTGACATCCTTTGACCGCTCTAGAGATAGAGTTTCTCTTTCGGAGGACAAAGTGACAGGTGGTGCATGGTT<br/> GTCGTCAGCTCGTGTGCTGAGATGTTGGGTTAAGTCCCGCAACGAGCGCAACCCTTGAACTTAGTTGCCATCATTC<br/> AGTTGGGCACTCTAAGTTGACTGCCGGTGACAAACCGGAGGAAGGTGGGGATGACGTCAAATCATCATGCCCTT<br/> ATGATTTGGGCTACACACGTGCTACAATGGACAATACAAAGGGCAGCGAAACCGCGAGGTCAAGCAAATCCCAT<br/> AAAGTTGTTCTCAGTTCGGATTGTAGTCTGCAACTCGACTACATGAAGCTGGAATCGCTAGTAATCGTAGATCAGC<br/> ATGCTACGGTGAATACGTTCCCGGGTCTTGACACACCGCCCGTCACACCACGAGAGTTTGTAACACCCGAAGCC</p>                                             | 100 | <i>Staphylococcus pseudintermedius</i> |
| <p>CTCAGATTGAACGCTGGCGGCAGGCTTAACACATGCAAGTCGAACGAGGTTAGAAAGCTTGCTTTTGATACCTAG<br/> TGGCGGACGGGTGAGTAATGCTTAGGAATCTGCCTAGTAGTGGGGGATAACTTGGGGAAACTCAAGCTAATACCG<br/> CATACGACCTACGGGTGAAAGGGGGCGCAAGCTCTCGCTATTAGATGAGCCTAAGTCGGATTAGCTAGTTGGTGG<br/> GGTAAAGGCGTACCAAGGCGACGATCTGTAGCTGGTCTGAGAGGATGATCAGCCACACTGGGACTGAGACACGG<br/> CCCAGACTCCTACGGGAGGCAGCAGTGGGGAATATTGGACAATGGGCGAAAGCCTGATCCAGCCATGCCGCGTG<br/> TGTGAAGAAGGCCTTTTGGTTGTAAAGCACTTAAAGTGGGGAGGAAAAGTTAATGGTTAATACCCATTAGCCCTGA<br/> CGTTACCCACAGAATAAGCACCGGCTAACTCTGTGCCAGCAGCCGCGGTAATACAGAGGGTGCAAGCGTTAATCG<br/> GAATTACTGGGCGTAAAGCGCGCGTAGGTGGTTACTTAAGTCAGATGTGAAAGCCCCGGGCTTAACCTGGGAACT<br/> GCATCTGATACTGGGTAAGTAGAGTAGGTGAGAGGGGAGTAGAATTCCAGGTGTAGCGGTGAAATGCGTAGAGAT<br/> CTGGAGGAATACCGATGGCGAAGGCAGCTCCCTGGCATCATACTGACACTGAGGTGCGAAAGCGTGGGTAGCAA<br/> ACAGGATTAGATACCCTGGTAGTCCACGCCGTAAACGATGTCTACCAGTCGTTGGGTCTTTTAAAGACTTAGTGAC<br/> GCAGTTAACGCAATAAGTAGACCGCCTGGGGAGTACGGCCGCAAGGTTAAAACTCAAATGAATTGACGGGGGCC<br/> CGCACAAGCGGTGGAGCATGTGTTTAAATTCGATGCAACGCGAAGAACCCTTACCTGGTCTTGACATATCTAGAAT<br/> CCGAAAGAGATTTTCGGAGTGCCTTCGGGAATTAGAATACAGGTGCTGCATGGCTGTCGTCAGCTCGTGTCTGAG<br/> ATGTTGGGTAAAGTCCCGCAACGAGCGCAACCCTTTCTTAGTTACCAGCACCTCGGGTGGGAACTCTAAGGAT<br/> ACTGCCAGTGACAACTGGAGGAAGGCGGGGACGACGTCAAGTCATCATGGCCCTTACGACCAGGGCTACACAC<br/> GTGCTACAATGGTAGGTACAAAGGGTTGTACACAGCGATGTGATGCCAATCTCAAAAAGCCTATCGTAGTCCGG<br/> ATTGGAGTCTGCAACTCGACTCCATGAAGTCGGAATCGCTAGTAATCGCAGATCAGAATGCTGCGGTGAATACGT<br/> TCCCGGGCCTTGACACACCGCCCGTCACACCATGGGAGTTGATCTCACCAGAAGTGGGTAGCCTAACGCAAGAG<br/> GGCGCTCACCACGGTGGGGTCGATGACTGGGGTGAAGTCGT</p> | 99  | <i>Moraxella canis</i>                 |

|                                                                                                                                                                                                                                                                                                                                                                                                                                                                                                                                                                                                                                                                                                                                                                                                                                                                                                                                                                                                                                                                                                                                                                                                                                                                                                                                                                                                                                                                                                                                                                                                  |              |                                               |
|--------------------------------------------------------------------------------------------------------------------------------------------------------------------------------------------------------------------------------------------------------------------------------------------------------------------------------------------------------------------------------------------------------------------------------------------------------------------------------------------------------------------------------------------------------------------------------------------------------------------------------------------------------------------------------------------------------------------------------------------------------------------------------------------------------------------------------------------------------------------------------------------------------------------------------------------------------------------------------------------------------------------------------------------------------------------------------------------------------------------------------------------------------------------------------------------------------------------------------------------------------------------------------------------------------------------------------------------------------------------------------------------------------------------------------------------------------------------------------------------------------------------------------------------------------------------------------------------------|--------------|-----------------------------------------------|
| <p>CTCAGATTGAACGCTGGCGGCAGGCCTAACACATGCAAGTCGAACGGTAACAGGAAGCAGCTTGTCTGCTTCGCTG<br/> ACGAGTGGCGGACGGGTGAGTAATGTCTGGGAACTGCCTGATGGAGGGGGATAACTACTGGAAACGGTAGCTA<br/> ATACCGCATAACGTCGCAAGACCAAAGAGGGGGACCTTCGGGCCCTCTTGCCATCGGATGTGCCAGATGGGATTA<br/> GCTAGTTGGTGGGGTAACGGCTCACCAAGGCGACGATCCCTAGCTGGTCTGAGAGGATGACCAGCCACACTGGAA<br/> CTGAGACACGGTCCAGACTCCTACGGGAGGCAGCAGTGGGGAATATTGCACAATGGGCGCAAGCCTGATGCAGC<br/> CATGCCGCGTGTATGAAGAAGGCCTTCGGGTGTAAAAGTACTTTACGCGGGGAGGAAGGGAGTAAAGTTAATACC<br/> TTTGCTCATTGACGTTACCCGCGAGAAGAAGCACCGGCTAACTCCGTGCCAGCAGCCGCGGTAATACGGAGGGTGC<br/> AAGCGTTAATCGGAATTACTGGGCGTAAAGCGCACGCAGGCGGTTTGTAAAGTCAGATGTGAAATCCCCGGGCTC<br/> AACCTGGGAACTGCATCTGATACTGGCAAGCTTGAGTCTCGTAGAGGGGGTAGAATTCCAGGTGTAGCGGTGAA<br/> ATGCGTAGAGATCTGGAGGAATACCGGTGGCGAAGGCGGCCCCCTGGACGAAGACTGACGCTCAGGTGCGAAAAG<br/> CGTGGGGAGCAAACAGGATTAGATACCCTGGTAGTCCACGCCGTAAACGATGTGCACTTGGAGGTTGTGCCCTTG<br/> AGGCGTGGCTTCCGGAGCTAACGCGTTAAGTCGACCGCCTGGGGAGTACGGCCGAAGGTTAAAACTCAAATGAA<br/> TTGACGGGGGCCCGCACAAAGCGGTGGAGCATGTGGTTTAAATTCGATGCAACGCGAAGAACCTTACCTGGTCTTGA<br/> CATCCACGGAAGTTTTCAGAGATGAAAAGGTGCCTTCGGGAACCGTGAGACAGGTGCTGCATGGCTGTGTCAGC<br/> TCGTGTGTGAAATGTTGGGTTAAGTCCCGCAACGAGCGCAACCCTTATCCTTTGTTGCCAGCGGTCCGGCCGGGA<br/> ACTCAAAGGAGACTGCCAGTGATAAACTGGAGGAAGGTGGGGATGACGTCAAGTCATCATGGCCCTTACGACCA<br/> GGGCTACACACGTGCTACAATGGCGCATACAAAGAGAAGCGACCTCGCGAGAGCAAGCGGACCTCATAAAGTGC<br/> GTCGTAGTCCGGATTGGAGTCTGCAACTCGACTCCTGAAGTCGGAATCGCTAGTAATCGTGGATCAGAATGCCA<br/> CGGTGAATACGTTCCCGGGCCTTGTACACACCGCCCCGTACACCATGGGAGTGGGTTGCAAAAAGAAGTAGGTAGC</p> | <p>99.86</p> | <p><i>Shigella flexneri</i></p>               |
| <p>CTCAGGATGAACGCTGGCGGCGTGCCTAATACATGCAAGTCGAGCGAACAGATAAGGAGCTTGTCTCCTTTGACGT<br/> TAGCGGGCGACGGGTGAGTAACACGTGGGTAACTACCTATAAGACTGGAATAACTCCGGGAAACCGGGGCTAA<br/> TGCCGGATAACATGTTGAACCGCATGGTTCTACAGTGAAAGACGGTCTTGTCTGCACTTATAGATGGACCCGCGC<br/> CGTATTAGCTAGTTGGTGGGGTAACGGCCTACCAAGGCGACGATACGTAGCCGACCTGAGAGGGTGATCGGCCAC<br/> ACTGGAACAGACACGGTCCAGACTCCTACGGGAGGCAGCAGTAGGGAATCTTCCGCAATGGGCGAAAGCCTG<br/> ACGGAGCAACGCCGCGTGAGTGATGAAGGTCTTCGGATCGTAAAGCTCTGTTGTTAGGGAAGAACAATGTGTAA<br/> GTAAGTGTGCACATCTTGACGGTACCTAACCAGAAAGCCACGGCTAACTACGTGCCAGCAGCCGCGGTAATACGT<br/> AGGTGGCAAGCGTTATCCGGAATTATTGGGCGTAAAGCGCGCGTAGGCGGTTTTTTAAGTCTGATGTGAAAGCCC<br/> ACGGCTCAACCGTGGAGGGTCATTGGAACTGGAAAACCTTGAGTGCAGAAGAGGAAAGTGGAAATCCATGTGTAG<br/> CGGTGAAATGCGCAGAGATATGGAGGAACACCACTGGCGAAGGCGGCTTTCTGGTCTGCAACTGACGCTGATGTG<br/> CGAAAGCGTGGGGATCAAACAGGATTAGATACCCTGGTAGTCCACGCCGTAACGATGAGTGCTAAGTGTAGGG<br/> GGTTTCCGCCCTTATGTCTGCAGCTAACGCATTAAGCACTCCGCTGGGGAGTACGGTCGCAAGACTGAAACTC<br/> AAAGGAATTGACGGGGACCCGCACAAGCGGTGGAGCATGTGGTTAATTCGAAGCAACGCGAAGAACCTTACCA<br/> AATCTTGACATCCTTTGACCGCTCTAGAGATAGAGTTTTTCCTCTTCGGAGGACAAAGTGACAGGTGGTGCATGGTT<br/> GTCGTCAGCTCGTGTGAGATGTTGGGTTAAGTCCCGCAACGAGCGCAACCCTTGAACCTTAGTTGCCATCATTC<br/> AGTTGGGCACTCTAAGTTGACTGCCGGTGACAAACCGGAGGAAGGTGGGGATGACGTCAAATCATCATGCCCCCTT<br/> ATGATTGGGGCTACACACGTGCTACAATGGACAATACAAAGGGCAGCGAAACCGCGAGGTCAAGCAAATCCCAT<br/> AAAGTTGTTCTCAGTTCGGATTGTAGTCTGCAACTCGACTACATGAAGCTGGAATCGCTAGTAATCGTAGATCAGC<br/> ATGCTACGGTGAATACGTTCCCGGCTTGTACACACCGCCCCGTACACCACGAGAGTTTGTAAACACCCGAAGCC</p>       | <p>100</p>   | <p><i>Staphylococcus pseudintermedius</i></p> |

|                                                                                                                                                                                                                                                                                                                                                                                                                                                                                                                                                                                                                                                                                                                                                                                                                                                                                                                                                                                                                                                                                                                                                                                                                                                                                                                                                                                                                                                                                                                                                                                                                                                       |     |                                                      |
|-------------------------------------------------------------------------------------------------------------------------------------------------------------------------------------------------------------------------------------------------------------------------------------------------------------------------------------------------------------------------------------------------------------------------------------------------------------------------------------------------------------------------------------------------------------------------------------------------------------------------------------------------------------------------------------------------------------------------------------------------------------------------------------------------------------------------------------------------------------------------------------------------------------------------------------------------------------------------------------------------------------------------------------------------------------------------------------------------------------------------------------------------------------------------------------------------------------------------------------------------------------------------------------------------------------------------------------------------------------------------------------------------------------------------------------------------------------------------------------------------------------------------------------------------------------------------------------------------------------------------------------------------------|-----|------------------------------------------------------|
| <p>CTCAGGACGAACGCTGGCGGCGTGCCTAATACATGCAAGTAGAACGCTGAGGACTGGTGCTTGCACCGGTCCAAG<br/>GAGTTGCGAACGGGTGAGTAACGCGTAGGTAACCTACCTCATAGCGGGGGATAACTATTGGAAACGATAGCTAAT<br/>ACCGCATAAAAGTGTTTAAACATGTTAACCATTAAAAAGGTGCAATTGCATCACTATGAGATGGACCTGCGTTGT<br/>ATTAGCTAGTTGGTGAGGTAACGGCTCACCAAGGCGACGATACATAGCCGACCTGAGAGGGTGATCGGCCACACT<br/>GGGACTGAGACACGGCCCAGACTCCTACGGGAGGCAGCAGTAGGGAATCTTCGGCAATGGACGGAAGTCTGACC<br/>GAGCAACGCCCGGTGAGTGAAGAAGGTTTTTCGGATCGTAAAGCTCTGTTGTTAGAGAAGAATGATGGTGGGAGTG<br/>GAAAATCCACCATGTGACGGTAACCTAACGAGAAAAGGACGGCTAACTACGTGCCAGCAGCCGCGGTAATACGTA<br/>GGTCCCGAGCGTTGTCCGGATTTATTGGGCGTAAAGCGAGCGCAGGCGGTTCTTTAAGTCTGAAGTTAAAGGCAG<br/>TGGCTCAACCATTGTACGCTTTGGAACTGGAGAACTTGAGTGCAGAAGGGGAGAGTGGAATTCATGTGTAGCG<br/>GTGAAATGCGTAGATATATGGAGGAACACCGGTGGCGAAAAGCGGCTCTCTGGTCTGTAACTGACGCTGAGGCTCG<br/>AAAGCGTGGGGAGCAAAACAGGATTAGATACCTGGTAGTCCACGCCGTAAACGATGAGTGCTAGGTGTTAGGCC<br/>TTTCCGGGGCTTAGTGCCGGAGCTAACGCATTAAGCACTCCGCCTGGGGAGTACGACCGCAAGGTTGAAACTCAA<br/>AGGAATTGACGGGGGCCCCGACAAAGCGGTGGAGCATGTGGTTTAATTCGAAGCAACGCGAAGAACCTTACCAGG<br/>TCTTGACATCCTCCTGACCGGTCTAGAGATAGGCTTTCCTTCGGGGCAGGAGTGACAGGTGGTGCATGGTTGTCTG<br/>TCAGCTCGTGTCTGAGATGTTGGGTTAAGTCCCGCAACGAGCGCAACCCCTATTGTTAGTTGCCATCATTAAGTT<br/>GGGCACTCTAGCGAGACTGCCGGTAATAAACCGGAGGAAGGTGGGGATGACGTCAAATCATCATGCCCTTATGA<br/>CCTGGGCTACACAGTGCTACAATGGTTGGTACAACGAGTCGCAAGCCGGTGACGGCAAGTAATCTCTTAAAGC<br/>CAATCTCAGTTCGGATTGTAGGCTGCAACTCGCCTACATGAAGTCGGAATCGCTAGTAATCGCGGATCAGCACGC<br/>CGCGGTGAATACGTTCCCGGGCCTTGTAACACCGCCCGTCACACCACGAGAGTTTGTAAACACCCGAAGTCGGTG<br/><del>AGGTAACCTATTAGGAGCCAGCCGCTAAGGTGGGATAGATGATTGGGGTGAAGTC</del></p> | 100 | <i>Streptococcus dysgalactiae subsp. Equisimilis</i> |
| <p>CTCAGATTGAACGCTGGCGGCAGGCCTAACACATGCAAGTCGAACGGTAACAGGAAGCAGCTTGCTGCTTTGCTG<br/>ACGAGTGGCGGACGGGTGAGTAATGTCTGGGAACTGCCTGATGGAGGGGGATAACTACTGGAAACGGTAGCTA<br/>ATACCGCATAACGTGCAAGACCAAAGAGGGGGACCTTCGGGCCTCTTGCCATCGGATGTGCCAGATGGGATTA<br/>GCTAGTAGGTGGGGTAACGGCTCACCTAGCGGACGATCCCTAGCTGGTCTGAGAGGATGACCAGCCACACTGGAA<br/>CTGAGACACGGTCCAGACTCCTACGGGAGGCAGCAGTGGGGAATATTGCACAATGGGCGCAAGCCTGATGCAGC<br/>CATGCCGCGTGATGAAGAAGGCCTTCGGGTTGTAAAGTACTTTACGCGGGGAGGAAGGGAGTAAAGTTAATACC<br/>TTTGCTCATTGACGTTACCCGCAGAAAGAAGCACCGGCTAACTCCGTGCCAGCAGCCGCGGTAATACGAGGGTG<br/>AAGCGTTAATCGGAATTACTGGGCGTAAAGCGCACGCAGGCGGTTTGTTAAGTCAGATGTGAAATCCCCGGGCTC<br/>AACCTGGGAACTGCATCTGATACTGGCAAGCTTGAGTCTCGTAGAGGGGGGTAGAATTCAGGTGTAGCGGTGAA<br/>ATGCGTAGAGATCTGGAGGAATACCGGTGGCGAAGGCGGCCCCCTGGACGAAGACTGACGCTCAGGTGCGAAAG<br/>CGTGGGGAGCAAAACAGGATTAGATACCCTGGTAGTCCACGCCGTAAACGATGTCGACTTGGAGGTTGTGCCCTTG<br/>AGGCGTGGCTTCCGGAGCTAACGCGTTAAGTCGACCGCCTGGGGAGTACGGCCGCAAGGTTAAAACTCAAATGAA<br/>TTGACGGGGGCCCGCACAAAGCGGTGGAGCATGTGGTTTAATTCGATGCAACGCGAAGAACCCTTACCTGGTCTTGA<br/>CATCCACGGAAGTTTTCAGAGATGAGAAATGTGCCTTCGGGAACCGTGAGACAGGTGCTGCATGGCTGTCGTCAGC<br/>TCGTGTTGTGAAATGTTGGGTTAAGTCCCGCAACGAGCGCAACCCTTATCCTTTGTTGCCAGCGGTCCGGCCGGGA<br/>ACTCAAAGGAGACTGCCAGTGATAAACTGGAGGAAGGTGGGGATGACGTCAAGTCATCATGGCCCTTACGACCA<br/>GGGCTACACACGTGCTACAATGGCGCATACAAAGAGAAGCGACCTCGCGAGAGCAAGCGGACCTCATAAAGTGC<br/>GTCGTAGTCCGGATTGGAGTCTGCAACTCGACTCCATGAAGTCGGAATCGCTAGTAATCGTGGATCAGAATGCCA<br/>CGGTGAATACGTTCCCGGGCCTTGTAACACCGCCCGTCACACCATGGGAGTGGGTTGCAAAAGAAGTAGGTAGC<br/><del>TTAACCTTCGGGAGGGCGCTTACCACCTTTGTGATTTCATGACTGGGGTGAAGTC</del></p>    | 100 | <i>Escherichia coli</i>                              |

|                                                                                                                                                                                                                                                                                                                                                                                                                                                                                                                                                                                                                                                                                                                                                                                                                                                                                                                                                                                                                                                                                                                                                                                                                                                                                                                                                                                                                                                                                                                                                                                                                                                                                                                                                                                                                                                                                                                                                                                                                                                                                                                                                                                                                                                                                                                                                                                                                                                                                                                                                                                                                                                                                                                                                                                                                                                                                                                                                                                                                                                                                                                      |      |                             |
|----------------------------------------------------------------------------------------------------------------------------------------------------------------------------------------------------------------------------------------------------------------------------------------------------------------------------------------------------------------------------------------------------------------------------------------------------------------------------------------------------------------------------------------------------------------------------------------------------------------------------------------------------------------------------------------------------------------------------------------------------------------------------------------------------------------------------------------------------------------------------------------------------------------------------------------------------------------------------------------------------------------------------------------------------------------------------------------------------------------------------------------------------------------------------------------------------------------------------------------------------------------------------------------------------------------------------------------------------------------------------------------------------------------------------------------------------------------------------------------------------------------------------------------------------------------------------------------------------------------------------------------------------------------------------------------------------------------------------------------------------------------------------------------------------------------------------------------------------------------------------------------------------------------------------------------------------------------------------------------------------------------------------------------------------------------------------------------------------------------------------------------------------------------------------------------------------------------------------------------------------------------------------------------------------------------------------------------------------------------------------------------------------------------------------------------------------------------------------------------------------------------------------------------------------------------------------------------------------------------------------------------------------------------------------------------------------------------------------------------------------------------------------------------------------------------------------------------------------------------------------------------------------------------------------------------------------------------------------------------------------------------------------------------------------------------------------------------------------------------------|------|-----------------------------|
| AGATTGAACGCTGGCGGCATGCTTTACACATGCAAGTCGAACGGCAGCACGGAAGAGCTTGCTCTTTTGGTGGCG<br>AGTGGCGAACGGGTGAGTAATACATCGGAACGTACCGAGTAGTGGGGGATAACTGTCCGAAAGGATGGCTAATA<br>CCGCATATTCTCTGAGGAGGAAAGCAGGGGACCTTCGGGCCCTTGGCTATTTGAGCGCCGATGTCTGATTAGCT<br>AGTTGGTGGGGTAAAGGCCTACCAAGGCGACGATCAGTAGCGGGTCTGAGAGGATGATCCGCCACACTGGGACT<br>GAGACACGGCCCAGACTCCTACGGGAGGCAGCAGTGGGGAATTTTGGACAATGGGGGGAACCCTGATCCAGCCA<br>TGCCGCGTGTCTGAAGAAGCCTTCGGGTGTGTAAAGGACTTTTGTACAGGAAGAAAAGCTTGAGGTTAATACCCT<br>TGAGTGATGACGGTACCTGAAGAATAAGCACCGGCTAACTACGTGCCAGCAGCCGCGGTAATACGTAGGGTGCG<br>AGCGTTAATCGGAATTACTGGGCGTAAAGCGGGCGCAGACGGTTACTTAAAGTCAGATGTGAAATCCCCGGGCTCA<br>ACCTGGGAACTGCGTTTGAAACTGGGTGACTAGAGTATGTCAGAGGGGGTAGAATTCCACGTGTAGCAGTGAAA<br>TGCGTAGAGATGTGGAGGAATACCGATGGCGAAGGCAGCCCCCTGGGATAAATACTGACGTTTCATGCCCGAAAAGC<br>GTGGGTAGCAAAACAGGATTAGATACCCTGGTAGTCCACGCCCTAAACGATGTCAATTAGCTGTTGGGGCACTTGA<br>TGCCTTAGTAGCGTAGCTAACGCGTGAAATTGACCGCCTGGGGAGTACGGTCGCAAGATTAAAACCTCAAAGGAAT<br>TGACGGGGACCCGCACAAGCGGTGGATGATGTGGATTAATTCGATGCAACGCGAAGAACCCTTACCTGGTCTTGAC<br>ATGTACGGAATCCTCCAGAGACGGAGGAGTGCTTCGGGAGCCGTAACACAGGTGCTGCATGGCTGTCTGCAGCT<br>CGTGTCGTGAGATGTTGGGTAAAGTCCCGCAACGAGCGCAACCCCTTGTCATTAGTTGCCATCATTAAGTTGGGCAC<br>TCTAATGAGACTGCCGGTGACAAGCCGGAGGAAGGTGGGGATGACGTCAAGTCCTCATGGCCCTTATGACCAGGG<br>CTTCACACGTATACAATGGTCCGTACAGAGGGTAGCCAAGCCGCGAGGTGGAGCCAATCCAGAAAACCGATC<br>GTAGTCCGATTGCACTCTGCAACTCGAGTGCATGAAGTCGGAATCGCTAGTAATCGCAGGTCAGCATACTGCGG<br>TGAATACGTTCCCGGGTCTTGACACACCGCCCGTCACACCATGGGAGTGGGGGATACCAGAAGTAGGTAGGGTA<br>CTCAGATTGAACGCTGGCGGCAGGCTTAACACATGCAAGTCGAACGGTAGCAGGAAGAAAGCTTGCTTTTTTTGTC<br>TGACGAGTGGCGGACGGGTGAGTAATGCTTGGGAATCTGGCTTATGGAGGGGGATAACTGTGGGAAACTGCAGCT<br>AATACCGGTATAATCGAGAGATGAAAGGGTGGGACCGTAAGGCCACTTGCCATAAGATGAGCCCAAGTGGGAT<br>TAGGTAGTTGGTGGGGTAAAGGCCTACCAAGCCTGCGATCTCTAGCTGGTCTGAGAGGATGGCCAGCCACACTGG<br>GACTGAGACACGGCCCAGACTCCTACGGGAGGCAGCAGTGGGGAATATTGCGCAATGGGGGGAACCCTGACGCA<br>GCCATGCCGCGTGAATGAAGAAGGCCTTCGGGTGTGTAAAGTTCTTTCGGTGATGAGGAAGGGGTATTATTGAATA<br>GATAATATCATTGACGTTAATTACAGAAAGAAGCACCGGCTAACTCCGTGCCAGCAGCCGCGGTAATACGGAGGGT<br>GCGAGCGTTAATCGGAATAACTGGGCGTAAAGGGCACGCAGGCGGACTTTTAAGTGAGATGTGAAATCCCCGAGC<br>TTAACTTGGGAACTGCATTTACAGACTGGGAGTCTAGAGTACTTTAGGGAGGGGTAGAATTCCACGTGTAGCGGTG<br>AAATGCGTAGAGATGTGGAGGAATACCGAAGGCGAAGGCAGCCCCCTGGGAATGTACTGACGCTCATGTGCGAA<br>AGCGTGGGGAGCAAAACAGGATTAGATACCCTGGTAGTCCACGCTGTAAACGCTGTGATTTGGGGATTGGACTTT<br>ATGTTTGGTGCCCGAAGCTAACGTGATAAATCGACCGCTGGGGAGTACGGCCGCAAGGTTAAAACCTCAAATGAA<br>TTGACGGGGGCCCCGACAAAGCGGTGGAGCATGTGGTTTAATTCGATGCAACGCGAAGAACCCTTACCTACTCTTGA<br>CATCCTAAGAAGAGCTCAGAGATGAGCTTGTGCCTTCGGGAACCTTAGAGACAGGTGCTGCATGGCTGTCTCAGC<br>TCGTGTGTGAAATGTTGGGTTAAGTCCCGCAACGAGCGCAACCCCTTATCCTTTGTTGCCAGCGATTGGTTCGGGA<br>ACTCAAAGGAGACTGCCAGTGACAAACTGGAGGAAGGTGGGGATGACGTCAAGTCATCATGGCCCTTACGAGTA<br>GGGCTACACACGTGCTACAATGGTGCATACAGAGGGCGGCGAGACGGCGACGTTGAGCGAATCTCAGAAAGTGC<br>ATCTAAGTCCGGATTGGAGTCTGCAACTCGACTCCATGAAGTCGGAATCGCTAGTAATCGCAAAATCAGAATGTTG<br>CGGTGAATACGTTCCCGGGCCTTGTACACACCGCCCGTCACACCATGGGAGTGGGTTGTACCAGAAGTGGATAGC | 100  | <i>Neisseria animaloris</i> |
| CTCAGATTGAACGCTGGCGGCAGGCTTAACACATGCAAGTCGAACGGTAGCAGGAAGAAAGCTTGCTTTTTTTGTC<br>TGACGAGTGGCGGACGGGTGAGTAATGCTTGGGAATCTGGCTTATGGAGGGGGATAACTGTGGGAAACTGCAGCT<br>AATACCGGTATAATCGAGAGATGAAAGGGTGGGACCGTAAGGCCACTTGCCATAAGATGAGCCCAAGTGGGAT<br>TAGGTAGTTGGTGGGGTAAAGGCCTACCAAGCCTGCGATCTCTAGCTGGTCTGAGAGGATGGCCAGCCACACTGG<br>GACTGAGACACGGCCCAGACTCCTACGGGAGGCAGCAGTGGGGAATATTGCGCAATGGGGGGAACCCTGACGCA<br>GCCATGCCGCGTGAATGAAGAAGGCCTTCGGGTGTGTAAAGTTCTTTCGGTGATGAGGAAGGGGTATTATTGAATA<br>GATAATATCATTGACGTTAATTACAGAAAGAAGCACCGGCTAACTCCGTGCCAGCAGCCGCGGTAATACGGAGGGT<br>GCGAGCGTTAATCGGAATAACTGGGCGTAAAGGGCACGCAGGCGGACTTTTAAGTGAGATGTGAAATCCCCGAGC<br>TTAACTTGGGAACTGCATTTACAGACTGGGAGTCTAGAGTACTTTAGGGAGGGGTAGAATTCCACGTGTAGCGGTG<br>AAATGCGTAGAGATGTGGAGGAATACCGAAGGCGAAGGCAGCCCCCTGGGAATGTACTGACGCTCATGTGCGAA<br>AGCGTGGGGAGCAAAACAGGATTAGATACCCTGGTAGTCCACGCTGTAAACGCTGTGATTTGGGGATTGGACTTT<br>ATGTTTGGTGCCCGAAGCTAACGTGATAAATCGACCGCTGGGGAGTACGGCCGCAAGGTTAAAACCTCAAATGAA<br>TTGACGGGGGCCCCGACAAAGCGGTGGAGCATGTGGTTTAATTCGATGCAACGCGAAGAACCCTTACCTACTCTTGA<br>CATCCTAAGAAGAGCTCAGAGATGAGCTTGTGCCTTCGGGAACCTTAGAGACAGGTGCTGCATGGCTGTCTCAGC<br>TCGTGTGTGAAATGTTGGGTTAAGTCCCGCAACGAGCGCAACCCCTTATCCTTTGTTGCCAGCGATTGGTTCGGGA<br>ACTCAAAGGAGACTGCCAGTGACAAACTGGAGGAAGGTGGGGATGACGTCAAGTCATCATGGCCCTTACGAGTA<br>GGGCTACACACGTGCTACAATGGTGCATACAGAGGGCGGCGAGACGGCGACGTTGAGCGAATCTCAGAAAGTGC<br>ATCTAAGTCCGGATTGGAGTCTGCAACTCGACTCCATGAAGTCGGAATCGCTAGTAATCGCAAAATCAGAATGTTG<br>CGGTGAATACGTTCCCGGGCCTTGTACACACCGCCCGTCACACCATGGGAGTGGGTTGTACCAGAAGTGGATAGC                                                                                                                                                                                                                                                                                                                                                                                                                                                                                                                                                                                                                                                                                                                                                                                                                                                                                                                                                                                                                                                                                                                                                                                                                                                                                                                                                                                                                                                                                                                                                          | 99.8 | <i>Pasteurella canis</i>    |

|                                                                                                                                                                                                                                                                                                                                                                                                                                                                                                                                                                                                                                                                                                                                                                                                                                                                                                                                                                                                                                                                                                                                                                                                                                                                                                                                                                                                                                                                                                                                                                                                                                                                                                                                                                                                                                                                                                                                                                                                                                                                                                                                                                                                                                                                                                                                                                                                                                                                                                                                                                                                                                                                                                                                                                                                                                                                                                                                                                                                                                                                                                                                                                                                                                |       |                                                           |
|--------------------------------------------------------------------------------------------------------------------------------------------------------------------------------------------------------------------------------------------------------------------------------------------------------------------------------------------------------------------------------------------------------------------------------------------------------------------------------------------------------------------------------------------------------------------------------------------------------------------------------------------------------------------------------------------------------------------------------------------------------------------------------------------------------------------------------------------------------------------------------------------------------------------------------------------------------------------------------------------------------------------------------------------------------------------------------------------------------------------------------------------------------------------------------------------------------------------------------------------------------------------------------------------------------------------------------------------------------------------------------------------------------------------------------------------------------------------------------------------------------------------------------------------------------------------------------------------------------------------------------------------------------------------------------------------------------------------------------------------------------------------------------------------------------------------------------------------------------------------------------------------------------------------------------------------------------------------------------------------------------------------------------------------------------------------------------------------------------------------------------------------------------------------------------------------------------------------------------------------------------------------------------------------------------------------------------------------------------------------------------------------------------------------------------------------------------------------------------------------------------------------------------------------------------------------------------------------------------------------------------------------------------------------------------------------------------------------------------------------------------------------------------------------------------------------------------------------------------------------------------------------------------------------------------------------------------------------------------------------------------------------------------------------------------------------------------------------------------------------------------------------------------------------------------------------------------------------------------|-------|-----------------------------------------------------------|
| TTAGAGTTTGAATCATGGCTCAGATTGAACGCTGGCGGCAGGCTTAACACATGCAAGTCGAGCGGAGAGAGGTA<br>GCTTGCTACTGATCTTAGCGGGACGGGTGAGTAATGCTTAGGAATCTGCCTATTAGTGGGGGACAACATCTCG<br>AAAGGGATGCTAATACCGCATACGTCCTACGGGAGAAAGCAGGGGATCTTCGGACCTTGCCTAATAGATGAGCC<br>TAAGTCGGATTAGCTAGTTGGTGGGGTAAAGGCCTACCAAGGCGACGATCTGTAGCGGGTCTGAGAGGATGATCC<br>GCCACACTGGGACTGAGACACGGCCCAGACTCCTACGGGAGGCAGCAGTGGGGAATATTGGACAATGGGGGGAA<br>CCCTGATCCAGCCATGCCGCGTGTGTGAAGAAGGCCTTATGGTTGTAAAGCACTTAAAGCGAGGAGGAGGCTACT<br>TTAGTTAATACCTAGAGATAGTGGACGTTACTCGCAGAATAAGCACCGGCTAACTCTGTGCCAGCAGCCGCGGTA<br>ATACAGAGGGTGCAAGCGTTAATCGGATTTACTGGGCGTAAAGCGCGCGTAGGCGGCTAATTAAGTCAAAATGTGA<br>AATCCCCGAGCTTMACTTGGGAATTGCATTTCGATACTGGTTAGCTAGAGTGTGGGAGAGGATGGTAGAATTCAG<br>GTGTAGCGGTGAAAATGCGTAGAGATCTGGAGGAATACCGATGGCGAAGGCAGCCATCTGGCCTAACACTGACGCT<br>GAGGTGCGAAAAGSAWSGKGAGCAAACAGGATTAGATACCCTGGTAGTCCATGCCGTAAACGATGTCTACTAGC<br>CGTTGGGGCCTTTGAGGCTTTAGTGGCGCAGCTAACGCGATAAGTAGACCGCCTGGGGAGTACGGTCGCAAGACT<br>AAAACCTCAAATGAATTGACGGGGGCCCCGACAAAGCGGTGGAGCATGTGGTTTAATTCGATGCAACGCGAAGAAC<br>CTTACCTGGCCTTGACATAGTAAGAACTTTCCAGAGATGGATTGGTGCCTTCGGGAACCTACATACAGGTGCTGCA<br>TGGCTGTCGTCAGCTCGTGTCTGAGATGTTGGGTTAAGTCCCGCAACGAGCGCAACCCCTTTTCCTTATTTGCCAG<br>CGAGTAATGTCGGGAACTTAAGGATACTGCCAGTGACAAACTGGAGGAAGGCGGGGACGACGTCAAGTCATCA<br>TGGCCCTTACGGCCAGGGCTACACAGTGCTACAATGGTCGGTACAAAGGGTTGCTACACAGCGATGTGATGCTA<br>ATCTCAAAAAGCCGATCGTAGTCCGGATTGGAGTCTGCAACTCGACTCCATGAAGTCGGAATCGCTAGTAATCGC<br>GGATCAGAATGCCGCGGTGAATACGTTCCCGGGCCTTGTAACACACCGCCCGTCACACCATGGGAGTTTGTGAC<br>CAGAAGTAGCTAGCCTAACTGCAAGAGGGCGGTTACCACGGTCTGGCCGATGACTG<br>GCTCAGATTGAACGCTGGCGGCAGGCCTAACACATGCAAGTCGAGCGGTAGCACAGAGAGCTTGCTCTCGGGTGA<br>CGAGCGGGCGGACGGGTGAGTAATGTCTGGGAACTGCCTGATGGAGGGGGATAACTACTGGAAACGGTAGCTAA<br>TACCGCATAACGTCGCAAGACCAAAGTGGGGGACCTTCGGGCCTCATGCCATCAGATGTGCCAGATGGGATTAG<br>CTAGTAGGTGGGGTAACGGCTCACCTAGGCGACGATCCCTAGCTGGTCTGAGAGGATGACCAGCCACACTGGAAC<br>TGAGACACGGTCCAGACTCCTACGGGAGGCAGCAGTGGGGAATATTGCACAATGGGCGCAAGCCTGATGCAGCC<br>ATGCCGCGTGTATGAAGAAGGCCTTCGGGTTGTAAAGTACTTTCAGCGGGGAGGAAGGCGATAAGGTTAATAACC<br>TTGTCGATTGACGTTACCCGCAAGAAGACACCGGCTAACTCCGTGCCAGCAGCCGCGTAATACGGAGGGTGCA<br>AGCGTTAATCGGAATTACTGGGCGTAAAGCGCACGCAGGCGGTCTGTCAAGTCGGATGTGAAATCCCCGGGCTCA<br>ACCTGGGAACTGCATTGAAAACCTGGCAGGCTAGAGTCTTGTAAGAGGGGGGTAGAATTCCAGGTGTAGCGGTGAAA<br>TGCGTAGAGATCTGGAGGAATACCGGTGGCGAAGGCGGGCCCCCTGGACAAAGACTGACGCTCAGGTGCGAAAGC<br>GTGGGGAGCAAACAGGATTAGATACCCTGGTAGTCCACGCCGTAACGATGTCGATTTGGAGGTTGTGCCCTTGA<br>GGCGTGGCTTCCGGAGCTAACGCGTTAAATCGACCGCCTGGGGAGTACGGCCGCAAGGTTAAAACTCAAATGAAT<br>TGACGGGGGGCCCGCACAAAGCGGTGGAGCATGTGGTTTAATTCGATGCAACGCGAAGAACCTTACCTGGTCTTGAC<br>ATCCACAGAACTTAGCAGAGATGCTTTGGTGCCTTCGGGAACTGTGAGACAGGTGCTGCATGGCTGTCGTCAGCT<br>CGTGTGTGAAATGTTGGGTAAAGTCCCGCAACGAGCGCAACCCCTTATCCTTTGTTGCCAGCGGTTTCGGCCGGGAA<br>CTCAAAGGAGACTGCCAGTGATAAACTGGAGGAAGGTGGGGATGACGTCAAGTCATCATGGCCCTTACGACCAG<br>GGCTACACACGTGCTACAATGGCATATACAAAGAGAAGCGACCTCGCGAGAGCAAGCGGACCTCATAAAGTATG<br>TCGTAGTCCGATTGGAGTCTGCAACTCGACTCCATGAAGTCGGAATCGCTAGTAATCGTAGATCAGAATGCTAC<br>GGTGAATACGTTCCCGGGCCTTGTAACACACCGCCCGTCACACCATGGGAGTGGGTTGCAAAAGAAGTAGGTAGCT<br>TAACCTTCGGGAGGGCGCTTACCACCTTTGTGATTTCATGACTGGGG | 99.46 | <i>Acinetobacter seifertii</i>                            |
| GCTCAGATTGAACGCTGGCGGCAGGCCTAACACATGCAAGTCGAGCGGTAGCACAGAGAGCTTGCTCTCGGGTGA<br>CGAGCGGGCGGACGGGTGAGTAATGTCTGGGAACTGCCTGATGGAGGGGGATAACTACTGGAAACGGTAGCTAA<br>TACCGCATAACGTCGCAAGACCAAAGTGGGGGACCTTCGGGCCTCATGCCATCAGATGTGCCAGATGGGATTAG<br>CTAGTAGGTGGGGTAACGGCTCACCTAGGCGACGATCCCTAGCTGGTCTGAGAGGATGACCAGCCACACTGGAAC<br>TGAGACACGGTCCAGACTCCTACGGGAGGCAGCAGTGGGGAATATTGCACAATGGGCGCAAGCCTGATGCAGCC<br>ATGCCGCGTGTATGAAGAAGGCCTTCGGGTTGTAAAGTACTTTCAGCGGGGAGGAAGGCGATAAGGTTAATAACC<br>TTGTCGATTGACGTTACCCGCAAGAAGACACCGGCTAACTCCGTGCCAGCAGCCGCGTAATACGGAGGGTGCA<br>AGCGTTAATCGGAATTACTGGGCGTAAAGCGCACGCAGGCGGTCTGTCAAGTCGGATGTGAAATCCCCGGGCTCA<br>ACCTGGGAACTGCATTGAAAACCTGGCAGGCTAGAGTCTTGTAAGAGGGGGGTAGAATTCCAGGTGTAGCGGTGAAA<br>TGCGTAGAGATCTGGAGGAATACCGGTGGCGAAGGCGGGCCCCCTGGACAAAGACTGACGCTCAGGTGCGAAAGC<br>GTGGGGAGCAAACAGGATTAGATACCCTGGTAGTCCACGCCGTAACGATGTCGATTTGGAGGTTGTGCCCTTGA<br>GGCGTGGCTTCCGGAGCTAACGCGTTAAATCGACCGCCTGGGGAGTACGGCCGCAAGGTTAAAACTCAAATGAAT<br>TGACGGGGGGCCCGCACAAAGCGGTGGAGCATGTGGTTTAATTCGATGCAACGCGAAGAACCTTACCTGGTCTTGAC<br>ATCCACAGAACTTAGCAGAGATGCTTTGGTGCCTTCGGGAACTGTGAGACAGGTGCTGCATGGCTGTCGTCAGCT<br>CGTGTGTGAAATGTTGGGTAAAGTCCCGCAACGAGCGCAACCCCTTATCCTTTGTTGCCAGCGGTTTCGGCCGGGAA<br>CTCAAAGGAGACTGCCAGTGATAAACTGGAGGAAGGTGGGGATGACGTCAAGTCATCATGGCCCTTACGACCAG<br>GGCTACACACGTGCTACAATGGCATATACAAAGAGAAGCGACCTCGCGAGAGCAAGCGGACCTCATAAAGTATG<br>TCGTAGTCCGATTGGAGTCTGCAACTCGACTCCATGAAGTCGGAATCGCTAGTAATCGTAGATCAGAATGCTAC<br>GGTGAATACGTTCCCGGGCCTTGTAACACACCGCCCGTCACACCATGGGAGTGGGTTGCAAAAGAAGTAGGTAGCT<br>TAACCTTCGGGAGGGCGCTTACCACCTTTGTGATTTCATGACTGGGG                                                                                                                                                                                                                                                                                                                                                                                                                                                                                                                                                                                                                                                                                                                                                                                                                                                                                                                                                                                                                                                                                                                                                                                                                                                                                                                                                                                                                                                                                                                                                                                                                     | 100   | <i>Klebsiella quasipneumoniae subsp. similipneumoniae</i> |

|                                                                                                                                                                                                                                                                                                                                                                                                                                                                                                                                                                                                                                                                                                                                                                                                                                                                                                                                                                                                                                                                                                                                                                                                                                                                                                                                                                                                                                                                                                                                                           |     |                                               |
|-----------------------------------------------------------------------------------------------------------------------------------------------------------------------------------------------------------------------------------------------------------------------------------------------------------------------------------------------------------------------------------------------------------------------------------------------------------------------------------------------------------------------------------------------------------------------------------------------------------------------------------------------------------------------------------------------------------------------------------------------------------------------------------------------------------------------------------------------------------------------------------------------------------------------------------------------------------------------------------------------------------------------------------------------------------------------------------------------------------------------------------------------------------------------------------------------------------------------------------------------------------------------------------------------------------------------------------------------------------------------------------------------------------------------------------------------------------------------------------------------------------------------------------------------------------|-----|-----------------------------------------------|
| AGATTGAACGCTGGCGGCAGGCCTAACACATGCAAGTCGAGCGGCAGCGGGAAAGTAGCTTGCTACTTTTGCCGG<br>CGAGCGGCGGACGGGTGAGTAATGCCTGGGAAAATTGCCAGTCGAGGGGGATAACAGTTGGAAACGACTGCTAA<br>TACCGCATACGCCCTACGGGGGAAAGCAGGGGACCTTCGGGCCTTGCGCGATTGGATATGCCCAGGTGGGATTAG<br>CTAGTTGGTGAGGTAATGGCTACCAAGGCGACGATCCCTAGCTGGTCTGAGAGGATGATCAGCCACACTGGAAC<br>TGAGACACGGTCCAGACTCCTACGGGAGGCAGCAGTGGGGAATATTGCACAATGGGGGAAACCCTGATGCAGCC<br>ATGCCCGCTGTGTGAAGAAGGCCTTCGGGTGTGTAAGCACTTTCAGCGAGGAGGAAAGGTTGATGCCTAATACGT<br>ATCAACTGTGACGTTACTCGCAGAAGAAGCACCGGCTAACTCCGTGCCAGCAGCCGCGGTAATACGGAGGGTGC<br>AAGCGTTAATCGGAATTACTGGGCGTAAAGCGCACGCAGGCGGTTGGATAAGTTAGATGTGAAAGCCCCGGGCTC<br>AACCTGGGAATTGCATTTAAAACTGTCCAGCTAGAGTCTTGTAGAGGGGGGTAGAATTCCAGGTGTAGCGGTGAA<br>ATGCGTAGAGATCTGGAGGAATACCGGTGGCGAAGGCGGCCCTTGACAAAAGACTGACGCTCAGGTGCGAAAAG<br>CGTGGGGAGCAAAACAGGATTAGATACCCTGGTAGTCCACGCCGTAAACGATGTGATTGGAGGCTGTGTCCTTG<br>AGACGTGGCTTCCGGAGCTAACGCGTTAAATCGACCGCCTGGGGAGTACGGCCGAAGGTTAAAACTCAAATGAA<br>TTGACGGGGGCCCGCACAAAGCGGTGGAGCATGTGGTTTAAATTCGATGCAACGCGAAGAACCTTACCTGGCCTTGA<br>CATGTCTGGAATCCTGTAGAGATACGGGAGTGCCTTCGGGAATCAGAACACAGGTGCTGCATGGCTGTCGTCAGC<br>TCGTGTCGTGAGATGTTGGGTTAAGTCCCGCAACGAGCGCAACCCCTGTCTTTGTTGCCAGCACGTAATGGTGGG<br>AACTCAAGGGAGACTGCCGGTGATAAACCGGAGGAAGGTGGGGATGACGTCAAGTCATCATGGCCCTTACGGCC<br>AGGGCTACACACGTGCTACAATGGCGCGTACAGAGGGCTGCAAGCTAGCGATAGTGAGCGAATCCAAAAAGCG<br>CGTCGTAGTCCGGATCGGAGTCTGCAACTCGACTCCGTGAAGTCGGAATCGCTAGTAATCGCAAAATCAGAATGTT<br>GCGGTGAATACGTTCCCGGGCCTTGACACACCGCCCGTCACACCATGGGAGTGGGTTCACCAGAAGTAGATAG          | 100 | <i>Aeromonas hydrophila subsp. Hydrophila</i> |
| GGATGAACGCTGGCGGCGTGCCTAATACATGCAAGTCGAGCGAACAGATAAGGAGCTTGCTCCTTTGACGTTAGC<br>GGCGGACGGGTGAGTAACACGTGGGTAACTACCTATAAGACTGGAATAACTCCGGGAAACCGGGGCTAATGCC<br>GGATAACATGTTGAACCGCATGGTTCTACAGTGAAAGACGGTCTTGCTGTCACTTATAGATGGACCCGCGCCGTAT<br>TAGCTAGTTGGTGGGGTAACGGCCTACCAAGGCGACGATACGTAGCCGACCTGAGAGGGTGATCGGCCACACTGG<br>AACTGAGACACGGTCCAGACTCCTACGGGAGGCAGCAGTAGGGAATCTTCCGCAATGGGCGAAAGCCTGACGGA<br>GCAACGCCGCGTGAGTGATGAAGGTCTTCGGATCGTAAAGCTCTGTTGTTAGGGAAGAACAAATGTGTAAGTAAC<br>TGTGCACATCTTGACGGTACCTAACCAGAAAGCCACGGCTAACTACGTGCCAGCAGCCGCGGTAATACGTAGGTG<br>GCAAGCGTTATCCGGAATTATTGGGCGTAAAGCGCGCGTAGGCGGTTTTTTAAGTCTGATGTGAAAGCCCACGGC<br>TCAACCGTGGAGGGTCATTGGAAACTTGAAACTTGAGTGCAAGAAGAGGAAAGTGGAAATTCATGTGTAGCGGTG<br>AAATGCGCAGAGATATGGAGGAACACAGTGGCGAAGGCGGGTTTCTGGTCTGCAACTGACGCTGATGTGCGAAA<br>GCGTGGGGATCAAACAGGATTAGATACCCTGGTAGTCCACGCCGTAAACGATGAGTGCTAAGTGTTAGGGGGTTT<br>CCGCCCCTTAGTGCTGCAGCTAACGCATTAAGCACTCCGCTGGGGAGTACGGTCGCAAGACTGAAACTCAAAGG<br>AATTGACGGGGACCCGCACAAGCGGTGGAGCATGTGGTTTAATTCGAAGCAACGCGAAGAACCTTACCAAATCTT<br>GACATCCTTTGACCGCTCTAGAGATAGAGTTTTCTCTTTCGGAGGACAAAAGTGACAGGTGGTGCATGGTTGTCGTC<br>AGCTCGTGTCGTGAGATGTTGGGTAAAGTCCCGCAACGAGCGCAACCCCTTGAAGTTAGTTGCCATCATTACAGTTGG<br>GCACTCTAAGTTGACTGCCGGTGACAAACCGGAGGAAGGTGGGGATGACGTCAAATCATCATGCCCTTATGATT<br>TGGGCTACACACGTGCTACAATGGACAATACAAAGGGCAGCGAAACCGCGAGGTCAAGCAAATCCCATAAAGTT<br>GTTCTCAGTTCGGATTGTAGTCTGCAACTCGACTACATGAAGCTGGAATCGCTAGTAATCGTAGATCAGCATGCTA<br>CGGTGAATACGTTCCCGGGTCTTGTAACACCGCCCGTCACACCACGAGAGTTTGTAAACACCCGAAGCCGGTGGA | 100 | <i>Staphylococcus pseudintermedius</i>        |

|                                                                                                                                                                                                                                                                                                                                                                                                                                                                                                                                                                                                                                                                                                                                                                                                                                                                                                                                                                                                                                                                                                                                                                                                                                                                                                                                                                                                                                                                                                                                                                                           |       |                                 |
|-------------------------------------------------------------------------------------------------------------------------------------------------------------------------------------------------------------------------------------------------------------------------------------------------------------------------------------------------------------------------------------------------------------------------------------------------------------------------------------------------------------------------------------------------------------------------------------------------------------------------------------------------------------------------------------------------------------------------------------------------------------------------------------------------------------------------------------------------------------------------------------------------------------------------------------------------------------------------------------------------------------------------------------------------------------------------------------------------------------------------------------------------------------------------------------------------------------------------------------------------------------------------------------------------------------------------------------------------------------------------------------------------------------------------------------------------------------------------------------------------------------------------------------------------------------------------------------------|-------|---------------------------------|
| GGACGAACGCTGGCGGCGTGCTTAACACATGCAAGTCGAACGGTAAGGCTCCAGCTTGCTGGGGTACACGAGTGG<br>CGAACGGGTGAGTAACACGTGGGTGACCTGCCCTGCACCTTCGGGATAAGCCTGGGAAACTGGGTCTAATACCGGA<br>TAGGACCGCACCGTGAGGGTGTGGTGGAAAAGTTTTTCGGTGTGGGATGGGCCCGCGCCTATCAGCTTGTTGGTG<br>GGGTAATGGCCTACCAAGGCGGCAGCGGTAGCCGGCCTGAGAGGGTGGACGGCCACATTGGGACTGAGACACG<br>GCCCAGACTCCTACGGGAGGCAGCAGTGGGGAATATTGCACAATGGGCGGAAGCCTGATGCAGCGACGCCGCGT<br>GGGGGATGACGGCCTTCGGGTGTGAAACTCCTTTCACCATCGACGAAGGGTTTCTGACGGTAGATGGAGAAGAAG<br>CACCGGCTAACTACGTGCCAGCAGCCGCGGTAATACGTAGGGTGCGAGCGTTGTCCGGAATTACTGGGCGTAAAG<br>AGCTCGTAGGTGGTTTGTGCGCTCGTCTGTGAAATTCCGGGGCTTAACTCCGGGCGTGCAGGCGATACGGGCATA<br>ACTTGAGTACTGTAGGGGAGACTGGAATTCCTGGTGTAGCGGTGAAATGCGCAGATATCAGGAGGAACACCGGTG<br>GCGAAGGCGGGTCTCTGGGCAGTAACGTGACGCTGAGGAGCGAAAGCATGGGGAGCGAACAGGATTAGATAACCCT<br>GGTAGTCCATGCCGTAAACGGTGGGCGCTAGGTGTGGGTTCCTTCCACGGGATCCGTGCCGTAGCTAACGCATT<br>AAGCGCCCCGCTGGGGAGTACGGCCGCAAGGCTAAAACTCAAAGGAATTGACGGGGCCCGCACAAAGCGCGG<br>AGCATGTGGATTAATTCGATGCAACGCGAAGAACCCTTACCTGGGCTTGACATATACAGGATCGCGCCAGAGATGG<br>TGTTTCCCTTGTTGCTTGTATACAGGTGGTGCATGGTTGTCGTGAGTCTGTCGTGAGATGTTGGGTAAAGTCCCG<br>CAACGAGCGCAACCCCTTGCTTATGTTGCCAGCACGTTGTGGTGGGGACTCGTAAGAAAAGTCCCGGGGTAACTC<br>GGAGGAAGGTGGGGATGACGTCAAATCATCATGCCCTTATGTCCAGGGCTTCACACATGCTACAATGGTCGGTA<br>CAGTGGGTTGCCAGTCCGTGAGGGCGAGCTAATCCCGCAAAGCCGGTCTCAGTTCCGATCGGGGTCTGCAACTCG<br>ACCCCGTGAAGTCGGAGTCGCTAGTAATCGCAGATCAGCAACGCTGCGGTGAATACGTTCCCGGGCCTTGTACAC<br>ACCGCCCGTCACGTCATGAAAGTCGGTAACACCCGAAGCCAGTGGCCTAACACATTTTTTGTGGGGGAGCTGTGCG<br>AAGGTGGGATTGGCGATTGGGACGAAGTCGTA | 100   | <i>Corynebacterium jeikeium</i> |
| AGGACGAACGCTGGCGGCGTGCTAATACATGCAAGTCGAACGCCTTTTCTTTCACCGGAGCTTGCTCCACCGAA<br>AGAAAAGGAGTGGCGAACGGGTGAGTAACACGTGGGTAACTTGCCCATCAGAAGGGGATAAACTTGGAACAG<br>GTGCTAATACCGTATAACAATAGAAAACCGCATGGTTTCTATTTGAAAGGCGCTTTTGCGTCACTGGTGGATGGACC<br>CGCGGTGCATTAGCTAGTTGGTGAGGTAACGGCTCACCAAGGCAACGATGCATAGCCGACCTGAGAGGGTGATCG<br>GCCACATTGGGACTGAGACACGGGCCAAACTCCTACGGGAGGCAGCAGTAGGGAATCTTCGGCAATGGACGAAA<br>GTCTGACCGAGCAACGCCGCGTGAGTGAAGAAGGTTTTCGGATCGTAAAACTCTGTTGTTAGAGAAGAACAAGGA<br>TGAGAGTAGAATGTTTATCCCTTGACGGTATCTAACCAGAAAGCCACGGCTAACTACGTGCCAGCAGCCGCGGTA<br>ATACGTAGGTGGCAAGCGTTGTCCGGATTTATTGGGCGTAAAGCGAGCGCAGGCGGTTTCTTAAAGTCTGATGTGA<br>AAGCCCCCGGCTCAACCGGGGAGGGTCATTGGAAGTGGGAACTTGAGTGCAGAAGAGGAGAGTGGAATTCCA<br>TGTGTAGCGGTGAAATGCGTAGATATATGGAGGAACACCAAGTGGCGAAGGCGGCTCTCTGGTCTGTAAGTACGCG<br>TGAGGCTCGAAAGCGTGGGGAGCAAAACAGGATTAGATACCTGGTAGTCCACGCCGTAAACGATGAGTGTAAAGT<br>GTTGGAGGGTTTCGGCCCTTCAAGTGTGTCAGCTAACGCATTAAGCACTCCGCCCTGGGGAGTACGACCGCAAGGTT<br>GAAACTCAAAGGAATTGACGGGGGCCCGCACAAAGCGGTGGAGCATGTGGTTTAATTGGAAGCAACGCGAAGAAC<br>CTTACCAGGTCTTGACATCCTTTGACCACTCTAGAGATAGAGCTTCCCCTTCGGGGGCAAAGTGACAGGTGGTGC<br>ATGGTTGTCGTGAGTCTGTCGTGAGATGTTGGGTAAAGTCCCGCAACGAGCGCAACCCCTTATTGTTAGTTGCCA<br>TCATTTAGTTGGGCACTCTAGCGAGACTGCCGGTGACAAACCGGAGGAAGGTGGGGATGACGTCAAATCATCATG<br>CCCCCTTATGACCTGGGCTACACACGTGCTACAATGGGAAGTACAACGAGTCGCGAAGTCGCGAGGCTAAGCTAAT<br>CTCTTAAAGCTTCTCTCAGTTCCGATTGTAGGCTGCAACTCGCCTACATGAAGCCGGAATCGCTAGTAATCGCGGA<br>TCAGCACGCCGCGGTGAATACGTTCCCGGGCCTTGTACACACCGCCCGTCACACCAGAGAGTTTGTAAACACCCG                                 | 99.39 | <i>Enterococcus raffinosus</i>  |

|                                                                                                                                                                                                                                                                                                                                                                                                                                                                                                                                                                                                                                                                                                                                                                                                                                                                                                                                                                                                                                                                                                                                                                                                                                                                                                                                                                                                                                                                                                                                                                                                                                           |       |                                                   |
|-------------------------------------------------------------------------------------------------------------------------------------------------------------------------------------------------------------------------------------------------------------------------------------------------------------------------------------------------------------------------------------------------------------------------------------------------------------------------------------------------------------------------------------------------------------------------------------------------------------------------------------------------------------------------------------------------------------------------------------------------------------------------------------------------------------------------------------------------------------------------------------------------------------------------------------------------------------------------------------------------------------------------------------------------------------------------------------------------------------------------------------------------------------------------------------------------------------------------------------------------------------------------------------------------------------------------------------------------------------------------------------------------------------------------------------------------------------------------------------------------------------------------------------------------------------------------------------------------------------------------------------------|-------|---------------------------------------------------|
| <p>CTCAGATTGAACGCTGGCGGCAGGCCTAACACATGCAAGTCGAACGGTAACAGGAAGCAGCTTGCTTCTTTGCTG<br/>ACGAGTGGCGGACGGGTGAGTAATGTCTGGGAACTGCCTGATGGAGGGGGATAACTACTGGAAACGGTAGCTA<br/>ATACCGCATAACGTCGCAAGACCAAAGAGGGGGACCTTCGGGCCTCTTGCCATCGGATGTGCCAGATGGGATTA<br/>GCTAGTAGGTGGGGTAACGGCTCACCTAGGCGACGATCCCTAGCTGGTCTGAGAGGATGACCAGCCACACTGGAA<br/>CTGAGACACGGTCCAGACTCCTACGGGAGGCAGCAGTGGGGAATATTGCACAATGGGCGCAAGCCTGATGCAGC<br/>CATGCCGCGTGTATGAAGAAGGCCTTCGGGTGTGTAAGTACTTTTCAGCGGGGAGGAAGGGAGTAAAGTTAATACC<br/>TTTGCTCATTGACGTTACCCGCGAGAAGAAGCACCGGCTAACTCCGTGCCAGCAGCCGCGGTAATACGGAGGGTGC<br/>AAGCGTTAATCGGAATTACTGGGCGTAAAGCGCACGCAGGCGGTTTGTAAAGTCAGATGTGAAATCCCCGGGCTC<br/>AACCTGGGAACTGCATCTGATACTGGCAAGCTTGAGTCTCGTAGAGGGGGTAGAATTCCAGGTGTAGCGGTGAA<br/>ATGCGTAGAGATCTGGAGGAATACCGGTGGCGAAGCGGGCCCCCTGGACGAAGACTGACGCTCAGGTGCGAAAAG<br/>CGTGGGGAGCAAACAGGATTAGATACCCTGGTAGTCCACGCCGTAAACGATGTGCACTTGGAGGTTGTGCCCTTG<br/>AGGCGTGGCTTCCGGAGCTAACGCGTTAAGTCGACCGCCTGGGGAGTACGGCCGCAAGGTTAAAACTCAAATGAA<br/>TTGACGGGGGCCCGCACAAAGCGGTGGAGCATGTGGTTTAAATTCGATGCAACGCGAAGAACCTTACCTGGTCTTGA<br/>CATCCACGGAAGTTTTCAGAGATGAAAAATGTGCCTTCGGGAACCGTGAGACAGGTGCTGCATGGCTGTCGTCAGC<br/>TCGTGTGTGAAATGTTGGGTAAAGTCCCGCAACGAGCGCAACCCTTATCCTTTGTTGCCAGCGGTCCGGCCGGGA<br/>ACTCAAAGGAGACTGCCAGTGATAAACTGGAGGAAGGTGGGGATGACGTCAAGTCATCATGGCCCTTACGACCA<br/>GGGCTACACACGTGCTACAATGGCGCATACAAAGAGAAGCGACCTCGCGAGAGCAAGCGGACCTCATAAAGTGC<br/>GTCGTAGTCCGGATTGGAGTCTGCAACTCGACTCCATGAAGTCGGAATCGCTAGTAATCGTGGATCAGAATGCCA<br/>CGGTGAATACGTTCCCGGGCCTTGTACACACCGCCCCGTACACCATGGGAGTGGGTTGCAAAAGAAGTAGGTAGC<br/>TTAACCTTCGGGAGGGCGCTTACCACCTTGTGATTGACTGCGGTGAAGTCGT</p> | 99.93 | <i>Escherichia coli</i>                           |
| <p>CTCAGGATGAACGCTAGCGGGAGGCCTAACACATGCAAGCCGAGCGGTAGATTACTTTCGGGTAATTGAGAGCGG<br/>CGTACGGGTGCGGAACACGTGTGCAACCTGCCTTTATCAGGGGGATAGCCTTTCGAAAGGAAGATTAATACCCCA<br/>TAATATATTATTCGGCATCGGGTGATATTGAAAACACGGTGGATAGAGATGGGCACGCGCAAGATTAGCTAGTT<br/>GGTGAGGTAAACGGCTACCAAGGCGACGATCTTTAGGGGGCCTGAGAGGGTGATCCCCCAGCTGGTACTGAGAC<br/>ACGGACCAGACTCCTACGGGAGGCAGCAGTGAGGAATATTGGACAATGGGTGGAAGCCTGATCCAGCCATCCCG<br/>CGTGCAGGAAGACGGCCCTATGGGTGTGAAACTGCTTTTATCTGGGGATAAACCTACTTACGTGTAAGTAGCTGAA<br/>GGTACCAGAAGAATAAGCACCGGCTAACTCCGTGCCAGCAGCCGCGGTAATACGGAGGGTGCAAGCGTTATCCG<br/>GATTTATTGGGTTTAAAGGGTCCGTAGGCGGACTGATAAGTCAGTGGTGAAATCCGACAGCTTAACTGTGCAACT<br/>GCCATTGATACTGTTAGTCTTGAGTAAGGTTGAAGTGGCTGGAATAAGTAGTGTAGCGGTGAAATGCATAGATATT<br/>ACTTAGAACACCAATTGCGAAGGCAGGTCACTAAGTCTTAACTGACGTGATGGACGAAAGCGTGGGGAGCGAA<br/>CAGGATTAGATACCCTGGTAGTCCACGCCGTAAACGATGATTACTCGTTTTTGGGTTTTATGATTGAGAGACTAAG<br/>CGAAAGTGATAAGTAATCCACCTGGGGAGTACGTTTCGCAAGAATGAAACTCAAAGGAATTGACGGGGGCCCGCA<br/>CAAGCGGTGGAGCATGTGGTTAATTCGATGATACGCGAGGAACCTTACCAAGACTTAAATGGGAAATGACAGAT<br/>TTAGAAATAGATCCTTCTTCGGACATTTTCAAGGTGCTGCATGGTTGTCGTCAGCTCGTCCGTGAGGTGTTAGG<br/>TTAAGTCTGCAACGAGCGCAACCCCTGTCACTAGTTGCTAACATTAAGTTGAGGACTCTAGTGAGACTGCCTAC<br/>GCAAGTAGAGAGGAAGGTGGGGATGACGTCAAATCATCACGGCCCTTACGTCTTGGGCCACACACGTGCTACAAT<br/>GGCCGGTACAGAGGGCAGCTACCTAGTGATAGGATGCAAATCTCGAAAGCCGGTCTCAGTTCGGATTGGAGTCTG<br/>CAACTCGACTCTATGAAGCTGGAATCGCTAGTAATCGCGCATCAGCCATGGCGCGGTGAATACGTTCCCGGGCCT<br/>TGTACACACCGCCCCGTCAAGCCATGGAAGCTGGGGGTACCTGAAGTCGGTGACCGTAAAAGGAGCTGCCTAGGGT</p>                                                             | 100   | <i>Elizabethkingia anophelis subsp. Anophelis</i> |

|                                                                                                                                                                                                                                                                                                                                                                                                                                                                                                                                                                                                                                                                                                                                                                                                                                                                                                                                                                                                                                                                                                                                                                                                                                                                                                                                                                                                                                                                                                                                                                                                                                                                                                                                                                                                                                                                                                                                                                                                                                                                                                                                                                                                                                                                                                                                                                                                                                                                                                                                                                                                                                                                                                                                                                                                                                                                                                                                                                                                                                                                                                                                                                 |       |                                |
|-----------------------------------------------------------------------------------------------------------------------------------------------------------------------------------------------------------------------------------------------------------------------------------------------------------------------------------------------------------------------------------------------------------------------------------------------------------------------------------------------------------------------------------------------------------------------------------------------------------------------------------------------------------------------------------------------------------------------------------------------------------------------------------------------------------------------------------------------------------------------------------------------------------------------------------------------------------------------------------------------------------------------------------------------------------------------------------------------------------------------------------------------------------------------------------------------------------------------------------------------------------------------------------------------------------------------------------------------------------------------------------------------------------------------------------------------------------------------------------------------------------------------------------------------------------------------------------------------------------------------------------------------------------------------------------------------------------------------------------------------------------------------------------------------------------------------------------------------------------------------------------------------------------------------------------------------------------------------------------------------------------------------------------------------------------------------------------------------------------------------------------------------------------------------------------------------------------------------------------------------------------------------------------------------------------------------------------------------------------------------------------------------------------------------------------------------------------------------------------------------------------------------------------------------------------------------------------------------------------------------------------------------------------------------------------------------------------------------------------------------------------------------------------------------------------------------------------------------------------------------------------------------------------------------------------------------------------------------------------------------------------------------------------------------------------------------------------------------------------------------------------------------------------------|-------|--------------------------------|
| <p>CTCAGATTGAACGCTAGCGGGATGCTTTACACATGCAAGTCGAACGGCAGCGCGGACTTCGGTCTGGCGGCGAGT<br/>GGCGAACGGGTGAGTAATGTATCGGAACGTGCCAGTAGCGGGGGATAACTACGCGAAAGCGTAGCTAATACCG<br/>CATACGCCCTACGGGGGAAAGCAGGGGATCGTAAGACCTTGCACTATTGGAGCGGCCGATATCGGATTAGCTAGT<br/>TGGTGAGGTAACGGCTACCAAGGCGACGATCCGTAGCTGGTTTGAGAGGACGACCAGCCACACTGGGACTGAG<br/>ACACGGCCCAGACTCCTACGGGAGGCGAGTGGGGAATTTTGGACAATGGGGGCAACCCTGATCCAGCCATCC<br/>CGCGTGTGCGATGAAGGCCCTTCGGGTTGTAAAGCACTTTTGGCAGGAAAGAAACGTCGCGGGTTAATACCCCGTG<br/>GAACTGACGGTACCTGCAGATAAAGCACCGGCTAACTACGTGCCAGCAGCCGCGGTAATACGTAGGGTGCAAGC<br/>GTTAATCGGAATTACTGGGCGTAAAGCGTGCGCAGGCGGTTTCGGAAGAAAGATGTGAAATCCCAGAGCTTAACT<br/>TTGGAAGTGCATTTTAACTACCGAGCTAGAGTGTGTAGAGGGAGGTGGAATTCCGCGTGTAGCAGTGAAATGC<br/>GTAGATATGCGGAGGAACACCGATGGCGAAGGCAGCCTCCTGGGATAAAGCTGACGCTCATGCACGAAAGCGTG<br/>GGGAGCAAACAGGATTAGATACCCTGGTAGTCCACGCCCTAAACGATGTCAACTAGCTGTTGGGGCCTTCGGGCC<br/>TTGGTAGCGCAGCTAACGCGTGAAAGTTGACCGCTGGGGAGTACGGTCGCAAGATTAATACTCAAAGGAATTGAC<br/>GGGGACCCGCGACAAGCGGTGGATGATGTGGATTAATTTCGATGCAACGCGAAAAACCTTACCTACCCCTTGACATGT<br/>CTGGAATCCTGAAGAGATTTAGGAGTGTCTGCAAGAGAACCGGAACACAGGTGCTGCATGGCTGTCGTCAGCTCG<br/>TGTCGTGAGATGTTGGGTAAAGTCCCGCAACGAGCGCAACCCCTTGTCATTAGTTGCTACGAAAGGGCACTCTAATG<br/>AGACTGCCGGTGACAAACCGGAGGAAGGTGGGGATGACGTCAAGTCCTCATGGCCCTTATGGGTAGGGCTTCACA<br/>CGTCATACAATGGTCGGGACAGAGGGTCGCCAACCCGCGAGGGGAGCCAATCCCAGAAACCCGATCGTAGTCC<br/>GGATCGCAGTCTGCAACTCGACTGCGTGAAGTCGGAATCGCTAGTAATCGCGGATCAGCATGTGCGCGGTGAATAC<br/><u>GTTCCCGGGTCTTGTTACACACCGCCCGTCACACCATGGGAGTGGGTTTACCAGAAGTAGTTAGCCTAACCGCAA</u><br/>TGGCTCAGATTGAACGCTGGCGGCAGGCCTAACACATGCAAGTCGAACGGTAACAGGAAGCAGCTTGCTGTTTCG<br/>CTGACGAGTGGCGGACGGGTGAGTAATGTCTGGGAACTGCCTGATGGAGGGGGATAACTACTGGAAACGGTAG<br/>CTAATACCCGCATAACGTCGCAAGACCAAAGAGGGGGACCTTCGGGCCTCTTGCCATCGGATGTGCCAGATGGGA<br/>TTAGCTTGTTGGTGGGGTAACGGCTCACCAAGGCGACGATCCCTAGCTGGTCTGAGAGGATGACCAGCCACACTG<br/>GAACTGAGACACGGTCCAGACTCCTACGGGAGGCAGCAGTGGGGAATATTGCAACAATGGGCGCAAGCCTGATGC<br/>AGCCATGCCGCGTGTATGAAGAAGGCCTTCGGGTTGTAAAGTACTTTCAGCGGGGAGGAAGGGAGTAAAGTTAAT<br/>ACCTTTGCTCATTGACGTTACCCCGCAGAAGAAGCACCGGCTAACTCCGTGCCAGCAGCCGCGGTAATACGGAGGG<br/>TGCAAGCGTTAATCGGAATTACTGGGCGTAAAGCGCACGACGAGCGGTTTGTAAAGTCAGATGTGAAATCCCCGGG<br/>CTCAACCTGGGAAGTGCATCTGATACTGGCAAGCTTGAGTCTCGTAGAGGGGGGGTAGAATTCCAGGTGTAGCGGT<br/>GAAATGCGTAGAGATCTGGAGGAATACCGGTGGCGAAGGCGGCCCCCTGGACGAAGACTGACGCTCAGGTGCGA<br/>AAGCGTGGGGAGCAAACAGGATTAGATACCCTGGTAGTCCACGCCGTAACGATGTGCACTTGAGAGTTGTGCC<br/>TTGAGGCGTGGCTTCCGGAGCTAACGCGTTAAGTCGACCGCCTGGGGAGTACGGCCGCAAGGTTAAACTCAAAT<br/>GAATTGACGGGGGCCCCGACAAGCGGTGGAGCATGTGGTTTAATTTCGATGCAACGCGAAGAACCCTTACCTGGTCT<br/>TGACATCCACGGAAGTTTTCAGAGATGAGAATGTGCCTTCGGGAACCGTGAGACAGGTGCTGCATGGCTGTCGTC<br/>AGCTCGTGTGTGAAATGTTGGGTAAAGTCCCGCAACGAGCGCAACCCCTATCCTTTGTTGCCAGCGGTCCGGCCG<br/>GGAAGTCAAAGGAGACTGCCAGTGATAAACTGGAGGAAGGTGGGGATGACGTCAAGTCATCATGGCCCTTACGA<br/>CCAGGGCTACACACGTGCTACAATGGCGCATACAAAGAGAAGCGACCTCGCGAGAGCAAGCGGACCTCATAAAG<br/>TGCGTCGTAGTCCGATTGGAGTCTGCAACTCGACTCCATGAAGTCGGAATCGTAGTAATCGTGGATCAGAATG<br/>CCACGGTGAATACGTTCCCGGGCCTTGTTACACACCGCCCGTCACACCATGGGAGTGGGTTGCAAAAGAAGTAGGT</p> | 99.52 | <i>Achromobacter insolitus</i> |
| <p>CTCAGATTGAACGCTAGCGGGATGCTTTACACATGCAAGTCGAACGGCAGCGCGGACTTCGGTCTGGCGGCGAGT<br/>GGCGAACGGGTGAGTAATGTATCGGAACGTGCCAGTAGCGGGGGATAACTACGCGAAAGCGTAGCTAATACCG<br/>CATACGCCCTACGGGGGAAAGCAGGGGATCGTAAGACCTTGCACTATTGGAGCGGCCGATATCGGATTAGCTAGT<br/>TGGTGAGGTAACGGCTACCAAGGCGACGATCCGTAGCTGGTTTGAGAGGACGACCAGCCACACTGGGACTGAG<br/>ACACGGCCCAGACTCCTACGGGAGGCGAGTGGGGAATTTTGGACAATGGGGGCAACCCTGATCCAGCCATCC<br/>CGCGTGTGCGATGAAGGCCCTTCGGGTTGTAAAGCACTTTTGGCAGGAAAGAAACGTCGCGGGTTAATACCCCGTG<br/>GAACTGACGGTACCTGCAGATAAAGCACCGGCTAACTACGTGCCAGCAGCCGCGGTAATACGTAGGGTGCAAGC<br/>GTTAATCGGAATTACTGGGCGTAAAGCGTGCGCAGGCGGTTTCGGAAGAAAGATGTGAAATCCCAGAGCTTAACT<br/>TTGGAAGTGCATTTTAACTACCGAGCTAGAGTGTGTAGAGGGAGGTGGAATTCCGCGTGTAGCAGTGAAATGC<br/>GTAGATATGCGGAGGAACACCGATGGCGAAGGCAGCCTCCTGGGATAAAGCTGACGCTCATGCACGAAAGCGTG<br/>GGGAGCAAACAGGATTAGATACCCTGGTAGTCCACGCCCTAAACGATGTCAACTAGCTGTTGGGGCCTTCGGGCC<br/>TTGGTAGCGCAGCTAACGCGTGAAAGTTGACCGCTGGGGAGTACGGTCGCAAGATTAATACTCAAAGGAATTGAC<br/>GGGGACCCGCGACAAGCGGTGGATGATGTGGATTAATTTCGATGCAACGCGAAAAACCTTACCTACCCCTTGACATGT<br/>CTGGAATCCTGAAGAGATTTAGGAGTGTCTGCAAGAGAACCGGAACACAGGTGCTGCATGGCTGTCGTCAGCTCG<br/>TGTCGTGAGATGTTGGGTAAAGTCCCGCAACGAGCGCAACCCCTTGTCATTAGTTGCTACGAAAGGGCACTCTAATG<br/>AGACTGCCGGTGACAAACCGGAGGAAGGTGGGGATGACGTCAAGTCCTCATGGCCCTTATGGGTAGGGCTTCACA<br/>CGTCATACAATGGTCGGGACAGAGGGTCGCCAACCCGCGAGGGGAGCCAATCCCAGAAACCCGATCGTAGTCC<br/>GGATCGCAGTCTGCAACTCGACTGCGTGAAGTCGGAATCGCTAGTAATCGCGGATCAGCATGTGCGCGGTGAATAC<br/><u>GTTCCCGGGTCTTGTTACACACCGCCCGTCACACCATGGGAGTGGGTTTACCAGAAGTAGTTAGCCTAACCGCAA</u><br/>TGGCTCAGATTGAACGCTGGCGGCAGGCCTAACACATGCAAGTCGAACGGTAACAGGAAGCAGCTTGCTGTTTCG<br/>CTGACGAGTGGCGGACGGGTGAGTAATGTCTGGGAACTGCCTGATGGAGGGGGATAACTACTGGAAACGGTAG<br/>CTAATACCCGCATAACGTCGCAAGACCAAAGAGGGGGACCTTCGGGCCTCTTGCCATCGGATGTGCCAGATGGGA<br/>TTAGCTTGTTGGTGGGGTAACGGCTCACCAAGGCGACGATCCCTAGCTGGTCTGAGAGGATGACCAGCCACACTG<br/>GAACTGAGACACGGTCCAGACTCCTACGGGAGGCAGCAGTGGGGAATATTGCAACAATGGGCGCAAGCCTGATGC<br/>AGCCATGCCGCGTGTATGAAGAAGGCCTTCGGGTTGTAAAGTACTTTCAGCGGGGAGGAAGGGAGTAAAGTTAAT<br/>ACCTTTGCTCATTGACGTTACCCCGCAGAAGAAGCACCGGCTAACTCCGTGCCAGCAGCCGCGGTAATACGGAGGG<br/>TGCAAGCGTTAATCGGAATTACTGGGCGTAAAGCGCACGACGAGCGGTTTGTAAAGTCAGATGTGAAATCCCCGGG<br/>CTCAACCTGGGAAGTGCATCTGATACTGGCAAGCTTGAGTCTCGTAGAGGGGGGGTAGAATTCCAGGTGTAGCGGT<br/>GAAATGCGTAGAGATCTGGAGGAATACCGGTGGCGAAGGCGGCCCCCTGGACGAAGACTGACGCTCAGGTGCGA<br/>AAGCGTGGGGAGCAAACAGGATTAGATACCCTGGTAGTCCACGCCGTAACGATGTGCACTTGAGAGTTGTGCC<br/>TTGAGGCGTGGCTTCCGGAGCTAACGCGTTAAGTCGACCGCCTGGGGAGTACGGCCGCAAGGTTAAACTCAAAT<br/>GAATTGACGGGGGCCCCGACAAGCGGTGGAGCATGTGGTTTAATTTCGATGCAACGCGAAGAACCCTTACCTGGTCT<br/>TGACATCCACGGAAGTTTTCAGAGATGAGAATGTGCCTTCGGGAACCGTGAGACAGGTGCTGCATGGCTGTCGTC<br/>AGCTCGTGTGTGAAATGTTGGGTAAAGTCCCGCAACGAGCGCAACCCCTATCCTTTGTTGCCAGCGGTCCGGCCG<br/>GGAAGTCAAAGGAGACTGCCAGTGATAAACTGGAGGAAGGTGGGGATGACGTCAAGTCATCATGGCCCTTACGA<br/>CCAGGGCTACACACGTGCTACAATGGCGCATACAAAGAGAAGCGACCTCGCGAGAGCAAGCGGACCTCATAAAG<br/>TGCGTCGTAGTCCGATTGGAGTCTGCAACTCGACTCCATGAAGTCGGAATCGTAGTAATCGTGGATCAGAATG<br/>CCACGGTGAATACGTTCCCGGGCCTTGTTACACACCGCCCGTCACACCATGGGAGTGGGTTGCAAAAGAAGTAGGT</p> | 100   | <i>Escherichia coli</i>        |

|                                                                                                                                                                                                                                                                                                                                                                                                                                                                                                                                                                                                                                                                                                                                                                                                                                                                                                                                                                                                                                                                                                                                                                                                                                                                                                                                                                                                                                                                                                                                                                                                                        |     |                               |
|------------------------------------------------------------------------------------------------------------------------------------------------------------------------------------------------------------------------------------------------------------------------------------------------------------------------------------------------------------------------------------------------------------------------------------------------------------------------------------------------------------------------------------------------------------------------------------------------------------------------------------------------------------------------------------------------------------------------------------------------------------------------------------------------------------------------------------------------------------------------------------------------------------------------------------------------------------------------------------------------------------------------------------------------------------------------------------------------------------------------------------------------------------------------------------------------------------------------------------------------------------------------------------------------------------------------------------------------------------------------------------------------------------------------------------------------------------------------------------------------------------------------------------------------------------------------------------------------------------------------|-----|-------------------------------|
| ATGGCTCAGATTGAACGCTGGCGGCAGGCCTAACACATGCAAGTCGAGCGGATGAAGGGAGCTTGCTCCTGGATT<br>CAGCGGCGGACGGGTGAGTAATGCCTAGGAATCTGCCTGGTAGTGGGGGATAACGTCCGGAAACGGGCGCTAAT<br>ACCGCATACGTCCTGAGGGAGAAAAGTGGGGGATCTTCGGACCTCACGCTATCAGATGAGCCTAGGTCCGATTAGC<br>TAGTTGGTGGGGTAAAGGCCTACCAAGGCGACGATCCGTAACCTGGTCTGAGAGGATGATCAGTCACACTGGAAC<br>GAGACACGGTCCAGACTCCTACGGGAGGCAGCAGTGGGGAATATTGGACAATGGGCGAAAGCCTGATCCAGCCA<br>TGCCGCGTGTGTGAAGAAGGTCTTCGGATTGTAAAGCACTTTAAGTTGGGAGGAAGGCGAGTAAGTTAATACCTT<br>GCTGTTTTGACGTTACCAACAGAATAAGCACCGGCTAACTTCGTGCCAGCAGCCGCGGTAATACGAAGGTGCAA<br>GCGTTAATCGGAATTACTGGGCGTAAAGCGCGCGTAGGTGGTTCAGCAAGTTGGATGTGAAATCCCCGGGCTCAA<br>CCTGGGAACTGCATCCAAAATACTGAGCTAGAGTACGGTAGAGGGTGGTGGAAATTCCTGTGTAGCGGTGAAAT<br>GCGTAGATATAGGAAGGAACACCAAGTGGCGAAGGCGACCACTGGACTGATACTGACACTGAGGTGCGAAAGCG<br>TGGGGAGCAAACAGGATTAGATACCCTGGTAGTCCACGCCGTAAACGATGTCGACTAGCCGTTGGGATCCTTGAG<br>ATCTTAGTGGCGCAGCTAACGCGATAAGTCGACCGCCTGGGGAGTACGGCCGCAAGGTTAAAATACTCAAATGAATT<br>GACGGGGGCCCGCACAAAGCGGTGGAGCATGTGGTTTAATTCGAAGCAACGCGAAGAACCCTTACCTGGCCTTGACA<br>TGCTGAGAACTTTCCAGAGATGGATTGGTGCCTTCGGGAACTCAGACACAGGTGCTGCATGGCTGTCGTCAGCTC<br>GTGTCGTGAGATGTTGGGTAAAGTCCCGTAACGAGCGCAACCCTTGTCCTTAGTTACCAGCACCTCGGGTGGGCA<br>CTCTAAGGAGACTGCCGGTGACAAACCGGAGGAAGGTGGGGATGACGTCAAGTCATCATGGCCCTTACGGCCAG<br>GGCTACACACGTGCTACAATGGTCGGTACAAAGGGTTGCCAAGCCGCGAGGTGGAGCTAATCCATAAAACCGAT<br>CGTAGTCCGGATCGCAGTCTGCAACTCGACTGCGTGAAGTCGGAATCGCTAGTAATCGTGAATCAGAATGTCACG<br>GTGAATACGTTCCCGGGCCTTGTACACACCGCCCGTCACACCATGGGAGTGGGTGCTCCAGAAGTAGCTAGTCT<br>AACC GCAAGGGGGACGGTTACCACGGAGTGATTTCATGACTGGGGGTGAAGTCGTAACA | 100 | <i>Pseudomonas aeruginosa</i> |
|------------------------------------------------------------------------------------------------------------------------------------------------------------------------------------------------------------------------------------------------------------------------------------------------------------------------------------------------------------------------------------------------------------------------------------------------------------------------------------------------------------------------------------------------------------------------------------------------------------------------------------------------------------------------------------------------------------------------------------------------------------------------------------------------------------------------------------------------------------------------------------------------------------------------------------------------------------------------------------------------------------------------------------------------------------------------------------------------------------------------------------------------------------------------------------------------------------------------------------------------------------------------------------------------------------------------------------------------------------------------------------------------------------------------------------------------------------------------------------------------------------------------------------------------------------------------------------------------------------------------|-----|-------------------------------|
