# Supplementary material for: Isolation of Oral Bacteria, Measurement of the C‐Reactive Protein, and Blood Clinical Parameters in Dogs with Oral Tumor
Source: Hindawi journal article supplement (doi:10.1155/2023/2582774), 2023-01-01
Supplement: f1 [file 2582774.f1.zip]

The nucleotide sequences of bacterial isolates from the no oral mass dogs

| Sequence                                                                                                                                                                                                                                                                                                                                                                                                                                                                                                                                                                                                                                                                                                                                                                                                                                                                                                                                                                                                                                                                                                                                                                                                                                                                                                                                                                                                                                                                                                                                                | % Identical | Bacterial identification               |
|---------------------------------------------------------------------------------------------------------------------------------------------------------------------------------------------------------------------------------------------------------------------------------------------------------------------------------------------------------------------------------------------------------------------------------------------------------------------------------------------------------------------------------------------------------------------------------------------------------------------------------------------------------------------------------------------------------------------------------------------------------------------------------------------------------------------------------------------------------------------------------------------------------------------------------------------------------------------------------------------------------------------------------------------------------------------------------------------------------------------------------------------------------------------------------------------------------------------------------------------------------------------------------------------------------------------------------------------------------------------------------------------------------------------------------------------------------------------------------------------------------------------------------------------------------|-------------|----------------------------------------|
| CTCAGGATGAACGCTGGCGGCGTGCCTAATACATGCAAGTCGAGCGAACAGATAAGGAGCTTGCTCCTTTGACGTTAGCGGCGGACGGGTGAGTAACACGCTGGGTAACCTACCTATAAAGACTGGAATAACTCCGGGAAACCGGGGCTAATGCCGGATAACATGTTGAACCGCATGGTTCTACAGTGAAAGACGGTCTTGCTGTCACTTATAGATGGACCCGCGCCGTATTAGCTAGTTGGTGGGGTAACGGCCTACCAAGGCGACGATACGTAGCCGACCTGAGAGGGTGATCGGCCACACTGGAAC TGAGACACGGTCCAGACTCCTACGGGAGGCAGCAGTAGGGAATCTTCCGCAATGGGCGAAAGCCTGACGGAGCAACGCCGCGTGAGTGATGAAGGTCCTCGATCGTAAAGCTCTGTTGTTAGGGAAGAACAAATGTGTAAGTAAGTGTGCACATCTTGACGGTACCTAACAGAAAAGCCACGGCTAACTACGTGCCAGCAGCCGCGGTAATACGTAGGTGGCAAGCGTTATCCGGAATTATTGGGCGTAAAGCGCGCGTAGGCGGTTTTTTAAGTCTGATGTGAAAGCCCACGGCTCAACCGTGGAGGGTCAATTGGAAACTGGAAAACCTTGAGTGCAGAAGAGGAAAGTGGAAATCCATGTGTAGCGGTGAAATGCGCAGAGATATGGAGGAACACCAAGTGGCGAAGGCGGCTTCTGGTCTGCAACTGACGCTGATGTGCGAAAGCGTGGGGATCAAACAGGATTAGATACCCTGGTAGTCCACGCCGTAAACGATGAGTGCTAAGTGTTAGGGGGTTTTCCGCCCTTAGTGCTGCAGCTAACGCATTAAAGCACTCCGCTGGGGAGTACGGTTCGCAAGACTGAAACTCAAAGGAATTGACGGGGACCCGCACAAGCGGTGGAGCATGTGGTTTTAATTCGAAGCAACGCGAAGAACCTTACCAATCTTGACATCCTTTGACCGCTCTAGAGATAGAGTTTTCTCTTCGGAGGACAAAAGTGACAGGTGGTGCATGGTTGTCGTGCTCAGCTCGTGTGCTGAGATGTTGGGTTAAGTCCCGCAACGAGCGCAACCCTTGAACCTTAGTTGCCATCATTCAGTTGGGCACTCTAAGTTGACTGCCGGTGACAAACCGGAGGAAGGTGGGGATGACGTCAAATCATCATGCCCCTTATGATTTGGGCTACACACGTGTACAATGGACAATACAAAGGGCAGCGAAACCGCGAGGTCAAGCAAAATCCATAAAAGTTGTTCTCAGTTCGGATTGTAGTCTGCAACTCGACTACATGAAGCTGGAATCGCTAGTAATCGTAGATAGCATGCTACGGTGAATACGTTCCCGGGTCTTGACACACCGCCCCGTACACCACGAGAGTTTGTAAACACCCGAAGCCGGTGGAGTAACCATTTTGGAGCTAGCCGTCGAAGGTGGGACAAATGATTGGGGTGAAGTCTAC | 100         | <i>Staphylococcus pseudintermedius</i> |
| CTCAGATTGAACGCTGGCGGCAGGCTTAACACATGCAAGTCGAACGGTAGCAGGAAGAAAGCTTGCTTTTTTTGCTGACGAGTGGCGGACGGGTGAGTAATGCTTGGGAATCTGGCTTATGGAGGGGGATAACTGTGGGAAACTGCAGCTAATACCGCGTATAATCGAGAGATGAAAGGGTGGGACCGTAAGGCCAAGTGGCATAAGATGAGCCAAAGTGGGATTAGGTAGTTGGTGGGGTAAAGGCCCTACCAAGCCTGCGATCTCTAGCTGGTCTGAGAGGATGGCCAGCCACACTGGGACTGAGACACGGCCCAGACTCCTACGGGAGGCAGCAGTGGGGAATATTGCGCAATGGGGGAACCGTGACGCAGCCATGCCGCGTGAATGAAGAAGGCCTTCGGGTTGTAAAGTTCTTTCGGTGATGAGGAAGGGGTATTATTGAATAGATAATATCATTGACGTTAATTACAGAAGAAGCACCGGCTAACTCCGTGCCAGCAGCCGCGGTAATACGGAGGGTGCGAGCGTTAATCGGAATAACTGGGCGTAAAGGGCACGCAGGCGGACTTTTAAGTGAGATGTGAAATCCCCGAGCTTAACTTGGGAAGTGCATTTTCAGACTGGGAGTCTAGAGTACTTTAGGGAGGGGTAGAATTCACGCTGTAGCGGTGAAATGCGTAGAGATGTGGAGGAATACCGAAGGCGAAGGCAGCCCTTGGGAATGTACTGACGCTCATGTGCGAAAGCGTGGGGAGCAAACAGGATTAGATACCCTGGTAGTCCACGCTGTAAACGCTGTCTGATTTGGGATTGGACTTTATGTTTTGGTGCCGAAGCTAACGTGATAAATCGACCGCTGGGGAGTACGGCCGAAGGTTAAAACTCAAATGAATTGACGGGGGCCGCACAAGCGGTGGAGCATGTGGTTTAATTCGATGCAACGCGAAGAACCTTACCTACTCTTGACATCCTAAGAAGAGCTCAGAGATGAGCTTGTGCCTTCGGGAACCTTAGAGACAGGTGCTGCATGGCTGCTGCTCAGCTCGTGTGTGAAATGTTGGGTAAAGTCCCGCAAAGAGCGCAACCCCTTATCCTTTGTTGCCAGCGATTTGGTCGGGAACCTCAAAGGAGACTGCCAGTGACAAACTGGAGGAAGGTGGGGATGACGTCAAGTCATCATGGCCCTTACGAGTAGGGCTACACACGTGCTACAATGGTGCATACAGAGGGCGGCGAGACGGCGACGTTGAGCGAATCTCAGAAAGTGATCTAAGTCCGATTGGAGTCTGCAACTCGACTCCATGAAGTCGGAATCGCTAGTAATCGCAAAATCAGAATGTTGCGGTGAATACGTTCCCGGGCCTTGACACACCGCCCCGTACACCATGGGAGTGGGTTGTACCAGAAGTGGATAGCTTAACGGAACGAGGGCGTTCACCACGGTATGATTATGACTGGGGTG                               | 99.8        | <i>Pasteurella canis</i>               |
| GGCTGCCTTTTCGAGCTCAGCGTCAGTTACAGACCAGAGAGCCGCTTCGCCACCGGTGTTCTCCATATATCTACGCATTTACCGCTACACATGGAATTCCACTCTCCCTTTCTGCACTCAAGTTCTCCAGTTTCCAAAGCATACATTGGTTGAGCCAATGCCTTTAACTTCAGACTTAAAGAACCGCTGCGCTCGCTTTACGCCCAATAAATCCGGACAACGCTCGGGACCTACGTAATTACCGCGGCTGCTGGCACGTAGTTAGCCGTCCCTTTCTGGTTAGTTACCGTCACATAATGGGTTTTCCACTCCCATACCGTCTTCTCTAACAACAGAGCTTTACGATCCGAAAACCTTCTTCACTACGCGGGCGTTGCTCGGTGAGGGTCCCCCATTTGCCGAAGATTCCTACTGCTGCCTCCCGTAGGAGTCTGGGCGGTGTCTCAGTCCAGTGTGGCCGATCACCTCTCAGGTCGGCTATGTATCGTCGCTTGGTGAGCCTTTACCTCACCAACTAGCTAATACAACGCAAGGTCCATCTCATAGTGGAGCAGTTGCCCTTTTAAGTTCTTAACATGTGTTAAGCACTTTTATGCGGTATTAGCTATCGTTTCCAATAGTTATCCCCGCTATCAGGTAGGTTACCTACGCGTACTACCCGTTGCAACTCCTTAGACTAGTGCAAGCACCTGTCTCAGCGTTCTACTTGATGTATTAGGCACGCCGACGCTTCGTCTGAGCCATATTCAAACTCTAAAAA                                                                                                                                                                                                                                                                                                                                                                                                                                                                                                                                                                                                                                                                                                                                                                | 99.61       | <i>Streptococcus canis</i>             |

|                                                                                                                                                                                                                                                                                                                                                                                                                                                                                                                                                                                                                                                                                                                                                                                                                                                                                                                                                                                                                                                                                                                                                                                                                                                                                                                                                                                                                                                                                                                        |       |                               |
|------------------------------------------------------------------------------------------------------------------------------------------------------------------------------------------------------------------------------------------------------------------------------------------------------------------------------------------------------------------------------------------------------------------------------------------------------------------------------------------------------------------------------------------------------------------------------------------------------------------------------------------------------------------------------------------------------------------------------------------------------------------------------------------------------------------------------------------------------------------------------------------------------------------------------------------------------------------------------------------------------------------------------------------------------------------------------------------------------------------------------------------------------------------------------------------------------------------------------------------------------------------------------------------------------------------------------------------------------------------------------------------------------------------------------------------------------------------------------------------------------------------------|-------|-------------------------------|
| CTCAGATTGAACGCTGGCGGCATGCTTTACACATGCAAGTCGAACGGCAGCACGGAAGAGCTTGCTCTTTTGGTGGCGAGTGGCGAACGGGTGAGTAACGCATCGGAACGTACCGAGTAGTGGGGGATAACTGTCCGAAAGGATGGCTAATACCGCATATTCTCTGAGGAGGAAAGCAGGGACCTTCGGGCCTTGGCCTATTTGAGCGGCCGATGTCTGATTAGCTAGTTGGTGGGGTAAAGGCCTACCAAGGCGACGATCAGTAGCGGTCTGAGAGGATGATCCGCCACACTGGGACTGAGACACGGCCCAGACTCCTACGGGAGGCAGCAGTGGGGAATTTTGGACAATGGGGGAAACCCTGATCCAGCCATGCCGCGTGTCTGAAGAAGGCCTTCGGGTGTGTAAGGACTTTTGTACAGGAAAGAAAAGCTTGAGGTTAATACCCTTGAGTGATGACGGTACCTGAAGAATAAGCACCGGCTAACTACGTGCCAGCAGCCGCGTAATACGTAGGGTGCGAGCGTTAATCGGAATTACTGGGCGTAAAGCGGGCGCAGACGGTTACTTAAGTCAGATGTGAAATCCCCGGGCTCAACCTGGGAACTGCGTTTGAAACTGGGTGACTAGAGTATGTCAGAGGGGGGTAGAATTCCACGTGTAGCAGTGAAATGCGTAGAGATGTGGAGGAATACCGATGGCGAAGGCAGCCCCCTGGGATAATACTGACGTTTCATGCCGAAAGCGTGGGTAGCAAAACAGGATTAGATACCCTGGTAGTCCACGCCCTAAACGATGTCAATTAGCTGTTGGGGCACTTGATGCCTTAGTAGCGTAGCTAACGCGTGAAATTGACCGCCTGGGGAGTACGGTCGCAAGATTAAAACTCAAAGGAATTGACGGGACCCGCACAAGCGGTGGATGATGTGGATTAATTCGATGCAACGCGAAGAACCCTTACCTGGTCTTGACATGTACGGAATCCTCAGAGACGGAGGAGTGCCTTCGGGAGCCGTAACACAGGTGCTGCATGGCTGTCGTCAGCTCGTGTGAGATGTTGGGTAAAGTCCCCGAACGAGCGCAACCCTTGTCAATTAGTTGCCATCTAAGTTGGGCACTCTAATGAGACTGCCGTTGACAAGCCGGAGGAAGGTGGGGATGACGTCAAGTCCTCATGGCCCTTATGACCAGGGCTTCACACGTACATAAATGGTCGGTACAGAGGTAGCCAAGCCGCGAGGTGGAGCCAATCCCAGAAAACCGATCGTAGTCCGGATTGCACTCTGCAACTCGAGTGCATGAAGTCGGAATCGCTAGTAATCGCAGGTCAGCATACTGCGGTGAATACGTTCCCGGGTCTTGTACACACCCGCCGTCACACCATGGGAGTGGGGGATACCAGAAGTAGGTAGGGTAACCGTAAGGAGCCCCCTTACCACGGTATGCTTCATGACTGGGG    | 100   | <i>Neisseria canis</i>        |
| ACTTTCCTTTTCGGGCATGACGTCACTATTATCCCAGGGGGTGCCTTCGCCATCGGTATTCTCCACATCTCTACGCATTTCACTGCTACACGTGGAATTCTACCCCCCTCTGACATACTCTAGCCACCCAGTTTCAAACGCAGTTCACAGGTTGAGCCCGGGGATTTACATCTGACTTAAGTAACCGTCTGCGCCCGCTTTACGCCAGTAATTCCGATTAACGCTCGCACCCCTACGTATTACCGCGGCTGCTGGCACGTAGTTAGCCGGTGCTTATTCTTCAGGTACCGTGCATAACTCAAGGGTATTAGCCTCAAGCTTTTCTTCCTGACAAAAGTCTTTACAACCCGAAGGCCTTCTTCAGACACGGGCATGGCTGGATCAGGCTTGCGCCCATTTGTCCAAAATTTCCCACTGCTGCCTCCCGTAGGAGTCTGGGCCGTGTCTCAGTCCAGTGTGGCGATCATCTCTCAGACCCGCTACTGATCGTCGCTTGGTAGGCCCTTACCCACCAACCGCTAATCAGACATCGGCCGCTCGAATAGCGCGAGGTCCAAAGATCCCCCGCTTTCTTCTCAAAGCGTATGCGGTATTAGCCATCCTTTTCGGACAGTTATCCCCCACTACTCGGTACGTTCCGATGCGTTACTCACCCGTTTCGCCACTCGCCACCCAAGAAGCAAGCTTCTTTGTGCTGCCGTCCGACTTGCATGTGTAAGCATGCCGCCAGCGTTCAATCTGAGCCATATACCCAAACTCCTAAAAA                                                                                                                                                                                                                                                                                                                                                                                                                                                                                                                                                                                                                                                                                                                         | 99.2  | <i>Neisseria dumasiana</i>    |
| CTCAGATTGAACGCTGGCGGCAGGCTTAACACATGCAAGTCGAACGGTAGCAGGAGAAAAGCTTGCTTTTCTTGCTGACGAGTGGCGGACGGGTGAGTAATGCTTGGGAATCTGGCTTATGGAGGGGGATAACTACTGGAACGGTAGCTAATACCGCGTAATATCGAGAGATTAAAGACTGGACCTACGGGCCAGTTGCCATAAGATGAGCCCAAGTGGGATTAGGTAGTTGGTGGGGTAAAGGCCTACCAAGCCCGCATCTCTAGCTGTCTGAGAGGATGACCAGCCACACTGGAACCTGAGACACGGTCCAGACTCCTACGGGAGGCAGCAGTGGGGAATATTGCACAATGGGGGAAACCCTGATGCAGCCATGCCGCGTGAATGAAGAAGGCCTTCGGGTGTGTAAGTTCTTTCCGGTGGTGAGGAAGGTATCAACTTTAATAGAGTTGGTAATTGACGTTATCCACAGAAGAAGCACCGGCTAACTCCGTGCCAGCAGCCGCGTAATACGGAGGGTGCGAGCGTTAATCGGAATGACTGGGCGTAAAGGGCACGCAGGCGGATGCTTAAGTGAGATGTGAAAGCCCCGGGCTTAACCTGGGAATTGCATTTCACTGGGCATCTAGAGTATTTTAGGGAGGGGTAGAATTCCACGTGTAGCGGTGAAATGCGTAGAGATGTGGAGGAATACCGAAGGCGAAGGCAGCCCCCTTGGGAATATACTGACGCTCATGTGCGAAAACGTGGGGAGCAAACAGGATTAGATACCCTGGTAGTCCACGCTGTAACGATGTGCAATTGGGGATTGGGGTTTAACTCTGGTGCCCGAAGCTAACGTGATAAATCGACCGCCTGGGGAGTACGGCCGCAAGGTTAAAACTCAAATGAATTGACGGGGCCCCGACAAGCGGTGGAGCATGTGGTTTAATTCGATGCAACGCGAAGAACCCTTACCTACTCTTGACATCCATGGAAGTTGCGCAGAGATGTGAATGTGCCTTCGGGAACCATGAGACAGGTGCTGCATGGCTGTCGTCAGCTCGTGTGTGAAATGTTGGGTAAAGTCCCGCAACGAGCGCAACCCTTATCCTTTGTTGCCAGCGATTAGGTCGGGAACTCAAAGGAGACTGCCAGTGATAAACTGGAGGAAGGTGGGGATGACGTCAAGTCATCATGGCCCTTACGAGTAGGGCTACACAGTGTCTACAATGGTGCATACAGAGGGAAGCAATATGGCGACATGGAGCAAATCTCACAAAGTGCATCTAAGTCCGGATTGGAGTCTGCAACTCGACTCCATGAAGTCGGAATCGCTAGTAATCGCAAATCAGAATGTTGCGGTGATACGTTCCCGGGCCTTGTACACACCCGCCGTCACACCATGGGAGTGGGTGTACCAGAAGTAGATAGCTTAACCGCAAGGGGGCGTTTTACCACGGTATGATTTCATGACTGGGGT | 99.52 | <i>Frederiksenia canicola</i> |

|                                                                                                                                                                                                                                                                                                                                                                                                                                                                                                                                                                                                                                                                                                                                                                                                                                                                                                                                                                                                                                                                                                                                                                                                                                                                                                                                                                                                                                                                                                                                                                                               |       |                                        |
|-----------------------------------------------------------------------------------------------------------------------------------------------------------------------------------------------------------------------------------------------------------------------------------------------------------------------------------------------------------------------------------------------------------------------------------------------------------------------------------------------------------------------------------------------------------------------------------------------------------------------------------------------------------------------------------------------------------------------------------------------------------------------------------------------------------------------------------------------------------------------------------------------------------------------------------------------------------------------------------------------------------------------------------------------------------------------------------------------------------------------------------------------------------------------------------------------------------------------------------------------------------------------------------------------------------------------------------------------------------------------------------------------------------------------------------------------------------------------------------------------------------------------------------------------------------------------------------------------|-------|----------------------------------------|
| CTCAGGATGAACGCTGGCGGCGTGCCTAATACATGCAAGTCGAGCGAACAGATAAGGAGCTTGCTCCTTTGACGTTAGCGGCGGACGGGT<br>GAGTAACACGTGGGTAACCTACCTATAAGACTGGAATAACTCCGGGAAACCGGGGCTAATGCCGGATAACATGTTGAACCGCATGGTTCT<br>ACAGTGAAAGACGGTCTTGCTGTCTACCTATAGATGGACCCGCGCCGTATTAGCTAGTTGGTGGGGTAACGGCCTACCAAGGCGACGATAC<br>GTAGCCGACCTGAGAGGGTGATCGGCCACACTGGAAGTGAGACACGGTCCAGACTCCTACGGGAGGCAGCAGTAGGGAATCTTCCGCAA<br>TGGGCGAAAGCCTGACGGAGCAACGCCGCTGAGTGATGAAGGTCTTCGGATCGTAAAGCTCTGTTGTTAGGGAAGAACAAATGTGTAAG<br>TAACGTGTGCACATCTTGACGGTACCTAACCAGAAAGCCACGGCTAACTACGTGCCAGCAGCCGCGGTAATACGTAGGTGGCAAGCGTTAT<br>CCGGAATTATTGGGCGTAAAGCGCGCTAGGCGGTTTTTTAAGTCTGATGTGAAAGCCCACGGCTCAACCGTGGAGGGTCATTGGAAACT<br>GGAAAACCTTGAGTGCAGAAAGAGGAAAGTGGAATTCCATGTGTAGCGGTGAAATGCGCAGAGATATGGAGGAACACCAGTGCGGAAGGCG<br>GCTTTCTGGTCTGCAACTGACGCTGATGTGCGAAAGCGTGGGGATCAAACAGGATTAGATACCCTGGTAGTCCACGCCGTAAACGATGAG<br>TGCTAAGTGTTAGGGGTTTTCCGCCCTTAGTGCTGCAGCTAACGCATTAAGCACTCCGCCTGGGGAGTACGGTCGCAAGACTGAAACTC<br>AAAGGAATTGACGGGGACCCGCACAAGCGGTGGAGCATGTGGTTTAATTCGAAGCAACGCGAAGAACCCTTACCAAATCTTGACATCCTTT<br>GACCGCTCTAGAGATAGAGTTTTCTCTTCGGAGGACAAAGTGACAGGTGGTGATGGTTGTCGTCAGCTCGTGTGAGATGTTGGGTT<br>AAGTCCCGCAACGAGCGCAACCCTTGAACCTAGTTGCCATCATTAGTTGGGCACTCTAAGTTGACTGCCGTGACAAACCGGAGGAAGG<br>TGGGGATGACGTCAAATCATCATGCCCTTATGATTTGGGCTACACACGTGCTACAATGGACAATACAAAGGGCAGCGAAACCGCGAGGT<br>CAAGCAAATCCCATAAAGTTGTTCTCAGTTCGGATTGTAGTCTGCAACTCGACTACATGAAGCTGGAATCGCTAGTAATCGTAGATCAGCA<br>TGCTACGGTGAATACGTTCCCGGGTCTGTGACACACCGCCGTCACACCACGAGAGTTTGTAAACCCGAAGCCGGTGGAGTAACCATTTT<br>GGAGCTAGCCGTCGAAGTGGGACAAATGATTGGGGT | 100   | <i>Staphylococcus pseudintermedius</i> |
| AGGCTTCTTTTCGCATGAGCGTCAGTATATTCCEAAGGGGTGCCTTCGCCTTCGGTATTCTCCACATCTCTACGCATTTCACCGCTACAG<br>TGGAATTCTACCCCTCCCTAAAATACTCTAGATGCCAGTCTGAAATGCAATTCCAGGTTAAGCCCGGGGCTTTCACATCTCACTTAAGC<br>ATCCGCTCGCTGCCCTTTACGCCAGTCAATTCCGATTAACGCTCGCACCTCCGTATTACCGCGGTGCTGGCACGGAGTAGCCGGTGC<br>TTCTTCTGTGGATAACGTCAATTACCAACTCTATTAAAGTTGATACCTTCCTACACCAGGAAAGAACTTTACAACCCGAAGGCCTTCTTCAT<br>TCACGCGCATGGTGCATCAGGGTTCCTCCCATTTGTGCAATATTCCTCACTGCTGCCTCCGTAGGAGTCTGGACCGTGTCTCAGTTCCA<br>GTGTGGCTGTGCATCCTCTCAGACCAGCTAGAGATCGCGGGCTTGGTAGGCCCTTACCCACCAACTACCTAATCCCACTTGGGCTCATCT<br>TATGGCAACTGGCCCCGTAGGTCCAGTCTTTAATCTCTCGATATTACGCGGTATTAGTACCGTTCAGTATTTCCAGTAGTTATCCCCCTCCATAAGCC<br>AGATTCCCAAGCATTACTACCCGTCCGCCACTCGTCAGCAAGAAAGCAAGCTTTCTCTGCTACCGTTCGACTTGTCATGTGTTAAGCCTG<br>CCGCCAGCGTTCAATCTGAGCCATGATTCCAAACTCTAA                                                                                                                                                                                                                                                                                                                                                                                                                                                                                                                                                                                                                                                                                                                                                                  | 98.69 | <i>Frederiksenia canicola</i>          |
| AGATTGAACGCTGGCGGCATGCTTTACACATGCAAGTCGGACGGCAGCACAGAGAAGCTTGCTTCTTGGGTGGCGAGTGGCGAACGGGTG<br>AGTAACGCATCGGAACGTACCGAGTAGTGGGGGATAACTGTCCGAAAGGATGGCTAATACCGCATACGCTTTTGAGAAGGAAAGCGGGG<br>ATCTTCGGACCTCGCGCTATTTCGAGCGGCCGATGTCTGATTAGCTAGTTGGTGGGGTAAAGGCCCTACCAAGGCGACGATCAGTAGCGGGT<br>CTGAGAGGATGATCCGCCACACTGGGACTGAGACACGGCCAGACTCCTACGGGAGGCAGCAGTGGGGAATTTGGACAATGGGCGCAA<br>GCCTGATCCAGCCATGCCGCGTGTCTGAAGAAGGCCTTCGGGTTGTAAAGGACTTTTGTACAGGGAAGAAAAGCTTGAGGCTAATACCCTT<br>AAGTGATGACGGTACCTGAAGAATAAGCACCGGCTAACTACGTGCCAGCAGCCGCGGTAATACGTAGGGTGCGAGCGTTAATCGGAATTA<br>CTGGGCGTAAAGCGGGCGCAGACGGTTACTTAAGTCAGATGTGAAATCCCCGGGCTCAACCTGGGAAGTGCCTTTGAACTGGGTAGCTA<br>GAGTATGTGACAGGGGGGTAGAATTCCACGTGTAGCAGTGAAATGCGTAGAGATGTGGAGGAATACCGATGGCGAAGGCAGCCCCCTGG<br>GATAATACTGACGTTTCATGCCGAAAGCGTGGGTAGCAAAACAGGATTAGATACCCTGGTAGTCCACGCCCTAAACGATGTCAATTAGCTG<br>TTGGGGCACTTGATGCCTTAGTAGCGTAGCTAACGCGTGAAATTGACCGCTGGGGAGTACGGTCGCAAGATTAAAACTCAAAGGAATTG<br>ACGGGGACCCGCACAAGCGGTGGATGATGTGGATTAATTCGATGCAACGCGAAGAACCCTTACCTGGTCTTGACATGTACGGAATCCTCCA<br>GAGACGGAGGAGTGCCTTCGGGAGCCGTAACACAGGTGCTGCATGGCTGTCGTGTCGTGAGATGTTGGGTAAAGTCCCGCAA<br>CGAGCCGAACCCCTTGTCATTAGTTGCCATCATTAAAGTTGGGCACTCTAATGAGACTGCCGGTGACAAGCCGGAGGAAGGTGGGGATGACG<br>TCAAGTCTCATGGCCCTTATGACCAGGGCTTCACACGTCATACAATGGTCGGTACAGAGGGTAGCCAAGCCGCGAGGTGGAGCCAATCC<br>CACAAAACCGATCGTAGTCCGGATTGCACTCTGCAACTCGAGTGATGAAGTCGGAATCGCTAGTAATCGCAGGTCAGCATACTGCGGTG<br>AATACGTTCCCGGGTCTTGATACACACCGCCGTCACACCATGGGAGTGGGGGATACCAGAAGTAGGTAGGGTAACCGCAAGGAGCCCGCT<br>TACCACGGTATGCTTCATGACTGGGTGAAGTCGTA     | 99.93 | <i>Neisseria dumasiana</i>             |

|                                                                                                                                                                                                                                                                                                                                                                                                                                                                                                                                                                                                                                                                                                                                                                                                                                                                                                                                                                                                                                                                                                                                                                                                                                                                                                                                                                                                                                                                                                                                                                                                                                    |              |                                               |
|------------------------------------------------------------------------------------------------------------------------------------------------------------------------------------------------------------------------------------------------------------------------------------------------------------------------------------------------------------------------------------------------------------------------------------------------------------------------------------------------------------------------------------------------------------------------------------------------------------------------------------------------------------------------------------------------------------------------------------------------------------------------------------------------------------------------------------------------------------------------------------------------------------------------------------------------------------------------------------------------------------------------------------------------------------------------------------------------------------------------------------------------------------------------------------------------------------------------------------------------------------------------------------------------------------------------------------------------------------------------------------------------------------------------------------------------------------------------------------------------------------------------------------------------------------------------------------------------------------------------------------|--------------|-----------------------------------------------|
| <p>TGCTTCTTTTCGCATCAGCGTCAGTTGCAGACCAGAAAGCCGCCTTCGCCACTGGTGTTCCTCCATATCTCTGCGCATTTACACGCTACACA<br/> TGGAATTCCACTTTCTCTTCTGCACTCAAGTTTTCCAGTTTCCAATGACCCTCCACGGTTGAGCCGTGGGCTTTCACATCAGACTTAAAAA<br/> ACCGCTACGCGCGCTTTACGCCCAATAATTCCGGATAACGCTTGCCACCTACGTATTACCGCGGCTGCTGGCACGTAGTTAGCCGTGGCT<br/> TTCTGGTTAGGTACCGTCAAGATGTGCACAGTTACTTACACATTTGTCTTCCCTAACAACAGAGCTTTACGATCCGAAGACCTTCATCACT<br/> CACGCGCGCTGTGCTCCGTCAGGCTTTCGCCCATTGCGGAAGATTCCCTACTGTGCCTCCCGTAGGAGTCTGGACCGTGTCTCAGTTCCAG<br/> TGTGGCCGATCACCTCTCAGGTCGGCTACGTATCGTCGCCTTGGTAGGCCGTTACCCACCAACTAGCTAATACGGCGCGGGTCCATCTA<br/> TAAGTGACAGCAAGACCGTCTTTCACTGTAGAACCATGCGGTTCAACATGTTATCCGGCATTAGCCCCGGTTTCCCGGAGTTATTCCAGTC<br/> TTATAGGTAGGTTACCCACGTGTTACTCACCGTCCGCCGCTAACGTCAAAGGAGCAAGTCCTTATCTGTTTCGCTCGACTTGCATGTATT<br/> AGGCACGCCGCCAGCGTTCATCCTGAGCCATATATCCAAACTCTAAAAA</p>                                                                                                                                                                                                                                                                                                                                                                                                                                                                                                                                                                                                                                                                                                                                                                      | <p>99.48</p> | <p><i>Staphylococcus pseudintermedius</i></p> |
| <p>AGATTGAACGCTGGCGGCATGCTTTACACATGCAAGTCGGACGGCAGCACAGAGAAGCTTGCTTCTTGGGTGGCGAGTGGCGAACGGGTG<br/> AGTAATGCATCGGAACGTACCGAGTAGTGGGGGATAACTGTCCGAAAGGATGGCTAATACCGCATACGCTTTGAGAAGGAAAGCAGGGG<br/> CTCTTCGGACCTTTCGCTATTTCGAGCGGCCGATGTCTGATTAGCTGGTTGGTGGGGTAAAGGCCCTACCAAGGCGACGATCAGTAGCGGGT<br/> CTGAGAGGATGATCCGCCACACTGGGACTGAGACACGGCCAGACTCCTACGGGAGGCAGCAGTGGGAATTTTGGACAATGGGCGCAA<br/> GCCTGATCCAGCCATGCCGCGTGTCTGAAGAAGGCCCTTCGGGTTGTAAAGGACTTTTGTCAAGGAAGAAAAGGTTGTGGTTAATACCCAT<br/> GACTGATGACGGTACCTGAAGAATAAGCACCGGCTAACTACGTGCCAGCAGCCGCGGTAATACGTAGGGTGCGAGCGTTAATCGGAATTA<br/> CTGGGCGTAAAGCGGGGCGAGACGGTTACTTAAGTCAGATGTGAAATCCCCGGGCTCAACCTGGGAAGTGCCTTTGAAACTGGGTGACTA<br/> GAGTATGTCAGAGGGGGGTAGAATTCCACGTGTAGCAGTGAAATCGCTAGAGATGTGGAGGAATACCGATGGCGAAGGCAGCCCCCTGG<br/> GATAATACTGACGTTTCATGCCGAAAGCGTGGGTAGCAAAACAGGATTAGATACCCCTGGTAGTCCACGCCCTAAACGATGTCAATTAGCTG<br/> TTGGGCAACTTGATTGCTTAGTAGCGTAGCTAACGCGTGAAATTGACCGCCTGGGGAGTACGGTTCGCAAGATTAAAACTCAAAGGAATTG<br/> ACGGGGACCCGCACAAGCGGTGGATGATGTGGATTAATTCGATGCAACGCGAAGAACCCTTACCTGGTCTTGACATGTACGGAATCCTCCA<br/> GAGACGGAGGAGTGCCTTCGGGAGCCGTAAACACAGGTGCTGCATGGCTGTCGTACGCTCGTGTGAGATGTTGGGTTAAGTCCCGCAA<br/> CGAGCGCAACCCTTGTCATTAGTTGCCATCATTTGGTTGGGCACTCTAATGAGACTGCCGGTGACAAGCCGGAGGAAGGTGGGGATGACG<br/> TCAAGTCCTCATGCGCCCTTATGACCAGGGCTTCACACGTATACAATGGTCGGTACAGAGGGTAGCCAAGCCGCGAGGTGGAGCCAATCC<br/> CACAAAACCGATCGTAGTCCGGATTGCACTCTGCAACTCGAGTGCATGAAGTCGGAATCGCTAGTAATCGCAGGTCAGCATACTGCGGTG<br/> AATACGTTCCCGGGTCTTGTAACACCCGCCGTCACACCATGGGAGTGGGGGATACCAGAAGTAGGTAGGGTAACCGCAAGGAGCCCGCT<br/> TACCACGGTATGCTTCATGACTGGGGTG</p> | <p>100</p>   | <p><i>Neisseria zoodegmatis</i></p>           |
| <p>AGTCTTCTTTTCGCAATGAGCGTCAGTATATTCCCAAGGGGCTGCCTTCGCCCTTCGGTATTCTCCACATCTCTACGCATTTACACGCTACA<br/> CGTGGAATTTCTACCCCTCCCTAAAAATACTCTAGATGCCAGTCTGAAATGCAATTCACAGGTTAAGCCCGGGGCTTTCACATCTCACTTAA<br/> GCATCCGCCTGCGTGCCTTTACGCCCAGTCATTCCGATTAAACGCTCGCACCCCTCCGTATTACCGCGGCTGCTGGCACGGAGTTAGCCGGT<br/> GCTTCTTCTGTGGATAACGTCAATTACCAACTCTATTAAAGTTGATACCTTCCTCACCAACCGAAAGAAGCTTTACAACCCGAAGGCCTTCTT<br/> CATTACGCGGCATGGCTGCATCAGGGTTCCCCCATTTGTGCAATATTCCCCACTGGTGGCCTCCCGAAGGAGCTGGGACCGGGTCTCAGT<br/> TCCAGTGTGGCTGGTCATCCTCTCAGACCAGCTAGAGATCGCGGGCTTGGTAGGCCTTTACCCACCAACTACCTAATCCCACTTGGGCTC<br/> ATCTTATGGCAACTGGCCCGTAGGTCCCAGTCTTTAATCTCTCGATATTACGCGGTATTAGCTACCGTTTCCAGTAGTTATCCCCCTCCATA<br/> AGCCAGATTCCCAAGCATTACTCACCGTCCGCCACTCGTCAGCAAGAAAGCAAGCTTTCCTGCTACCGTTCGACTTGCATGTGTAAAG<br/> CCTGCCGCCAGCGTTCAATCTGAGCCATGATCCAAACTCTAAAAA</p>                                                                                                                                                                                                                                                                                                                                                                                                                                                                                                                                                                                                                                                                                                                                                                      | <p>99</p>    | <p><i>Frederiksenia canicola</i></p>          |

|                                                                                                                                                                                                                                                                                                                                                                                                                                                                                                                                                                                                                                                                                                                                                                                                                                                                                                                                                                                                                                                                                                                                                                                                                                                                                                                                                                                                                                                                                                                                                                                                                                    |       |                                        |
|------------------------------------------------------------------------------------------------------------------------------------------------------------------------------------------------------------------------------------------------------------------------------------------------------------------------------------------------------------------------------------------------------------------------------------------------------------------------------------------------------------------------------------------------------------------------------------------------------------------------------------------------------------------------------------------------------------------------------------------------------------------------------------------------------------------------------------------------------------------------------------------------------------------------------------------------------------------------------------------------------------------------------------------------------------------------------------------------------------------------------------------------------------------------------------------------------------------------------------------------------------------------------------------------------------------------------------------------------------------------------------------------------------------------------------------------------------------------------------------------------------------------------------------------------------------------------------------------------------------------------------|-------|----------------------------------------|
| <p>CTCAGATTGAACGCTGGCGGCAGGCTTAACACATGCAAGTCGAACGGTAGCAGGGAGAAAGCTTGCTTTCTTTGCTGACGAGTGCGGAC<br/>GGGTGAGTAATGCTTGGGAATCTGGCTTATGGAGGGGGATAACTGCGGGAAACTGCAGCTAATACCGGTATTATCGGAAGATGAAAGGG<br/>TGGGACCTTCGGGCCACCTGCCATAAGATGAGCCCAAGTGGGATTAGGTAGTTGGTGGGGTAAGGGCCTACCAAGCCGACGATCTCTAGC<br/>TGGTCTGAGAGGATGACCAGCCACACTGGGACTGAGACACGGCCCAGACTCTACGGGAGGCAGCAGTGGGGAATATTGCGCAATGGGG<br/>GGAACCCTGACGCAGCCATGCCGCGTGAATGAAGAAGGCCTTCGGGTTGTAAAGTTCTTTTCGGTAATGAGGAAGGGGTATTATTGAATAG<br/>ATAATATCATTGACGTTAATTACAGAAGAAGCACCGGCTAACTCCGTGCCAGCAGCCGCGGTAATACGGAGGGTGCGAGCGTTAATCGGA<br/>ATAACTGGGCGTAAAGGGCACGCAGGCGGACTTTTAAAGTGAGATGTGAAATCCCCGAGCTTAACTTGGGAACTGCATTTTCAGACTGGGAG<br/>TCTAGAGTACTTTAGGGAGGGGTAGAATTCACGTGTAGCGGTGAAATGCGTAGAGATGTGGAGGAATACCGAAGGCGAAGGCAGCCCT<br/>TGGGAATGTACTGACGCTCATGTGCGAAAGCGTGGGGAGCAAACAGGATTAGATACCCTGGTAGTCCACGCTGTAAACGCTGTGCGATTTG<br/>GGGATTGGGCTTTATGCTTGGTGCCCGAAGCTAACGTGATAAATCGACCGCCTGGGGAGTACGGCCGAAGGTTAAACTCAAATGAATT<br/>GACGGGGGCCCGCACAAAGCGGTGGAGCATGTGGTTTAATTCGATGCAACGCGAAGAACCTTACCTACTCTTGACATCCTAAGAAGAGCTC<br/>AGAGATGAGCTTGTGCCTTCGGGAACCTAGAGACAGGTGCTGCATGGCTGTCGTAGCTCGTGTGTGAAATGTTGGGTAAAGTCCCGCAA<br/>CGAGCGCAACCCTTATCCTTTGTTGGCAGCGATTTGGTTCGGGAACCTCAAAGGAGACTGCCAGTGACAACTGGAGGAAGGTGGGGATGAC<br/>GTCAAGTCATCATGGCCCTTACGAGTAGGGCTACACACGTGCTACAATGGTGCATACAGAGGGCGGCGAGACGGCGACGTTGAGCGAATC<br/>TCATAAAGTGACATCTAAGTCCGGATTGGAGTCTGCAACTCGACTCCATGAAGTCGGAATCGCTAGTAATCGCAAATCAGAATGTTGCGGT<br/>GAATACGTTCCCGGGCCTTGTACACACCGCCCGTCACACCATGGGAGTGGGTTGTACCAGAAGTGGATAGCTTAACGGAACGAGGGCGT<br/>TCACCACGGTATGATTTCATGACTGGGGTG</p>                 | 99.86 | <i>Pasteurella canis</i>               |
| <p>CTCAGGATGAACGCTGGCGGCGTGCCTAATACATGCAAGTCGAGCGAACAGATAAGGAGCTTGCTCCTTTGACGTTAGCGGCGGACGGGT<br/>GAGTAACACGTGGGTAACCTACCTATAAGACTGGAATAACTCCGGGAAACCGGGGCTAATGCCGGATAACATGTTGAACCGCATGGTTCT<br/>ACAGTGAAAGACGGTCTTGCTGTCACTTATAGATGGACCCGCGCCGTATTAGCTAGTTGGTGGGGTAACGGCCTACCAAGGCGACGATAC<br/>GTAGCCGACCTGAGAGGGTGATCGGCCACACTGGAAC TGAGACACGGTCCAGACTCCTACGGGAGGCAGCAGTAGGGAATCTTCCGCAA<br/>TGGGCGAAAGCCTGACGGAGCAACGCCGCGTGAGTGATGAAGGTCTTCGGATCGTAAAGCTCTGTTGTTAGGGAAGAATAAATGTGTAAG<br/>TAACTGTGCACATCTTGACGGTACCTAACCAAGAAAGCCACGGTAAC TACGTGCCAGCAGCCGCGTAATACGTAGGTGGCAAGCGTTAT<br/>CCGGAATTATTGGGCGTAAAGCGCGCTAGGCGGTTTTTTAAGTCTGATGTGAAAGCCACGGCTCAACCGTGGAGGGTCATTGGAACT<br/>GGAAAACCTTGAGTGCAGAAGAGGAAAGTGGAATTCATGTGTAGCGGTGAAATGCGCAGAGATATGGAGGAACACCAGTGGCGAAGGCG<br/>GCTTCTGCTGCAACTGACGCTGATGTGCGAAAGCGTGGGGATCAAACAGGATTAGATACCCTGGTAGTCCACGCCGTAAACGATGAG<br/>TGCTAAGTGTTAGGGGGTTTCCGCCCTTAGTGCTGCAGCTAACGCATTAAGCACTCCGCCTGGGGAGTACGGTCGCAAGACTGAAACTC<br/>AAAGGAATTGACGGGGACCCGCACAAGCGGTGGAGCATGTGGTTTAATTCGAAGCAACGCGAAGAACCTTACCAAATCTTGACATCCTTT<br/>GACCGCTCTAGAGATAGAGTTTTCTCTTTCGGAGGACAAAGTGACAGGTGGTGCATGGTTGTCGTCAGCTCGTGTGAGATGTTGGGTT<br/>AAGTCCCGCAACGAGCGCAACCCTTGAACCTTAGTTGCCATCATTCAGTTGGGCACCTCTAAGTTGACTGCCGCTGACAAACCGGAGGAAGG<br/>TGGGGATGACGTCAAATCATCATGCCCTTATGATTGGGCTACACACGTGCTACAATGGACAATACAAAGGGCAGCGAAACCGCGAGGT<br/>CAAGCAAATCCCATAAAGTTGTTCTCAGTTCGGATTGTAGTCTGCAACTCGACTACATGAAGCTGGAATCGCTAGTAATCGTAGATCAGCA<br/>TGCTACGGTGAATACGTTCCCGGGTCTGTGACACACCGCCCGTCACACACGAGAGTTTGTAACACCCGAAGCCGGTGGAGTAACCATTTT<br/>GGAGCTAGCCGTCGAAGGTGGGACAAATGATTGGGGTGAAGTCGTACAGGGG</p> | 100   | <i>Staphylococcus pseudintermedius</i> |

|                                                                                                                                                                                                                                                                                                                                                                                                                                                                                                                                                                                                                                                                                                                                                                                                                                                                                                                                                                                                                                                                                                                                                                                                                                                                                                                                                                                                                                                                                                                                                                                                                     |       |                              |
|---------------------------------------------------------------------------------------------------------------------------------------------------------------------------------------------------------------------------------------------------------------------------------------------------------------------------------------------------------------------------------------------------------------------------------------------------------------------------------------------------------------------------------------------------------------------------------------------------------------------------------------------------------------------------------------------------------------------------------------------------------------------------------------------------------------------------------------------------------------------------------------------------------------------------------------------------------------------------------------------------------------------------------------------------------------------------------------------------------------------------------------------------------------------------------------------------------------------------------------------------------------------------------------------------------------------------------------------------------------------------------------------------------------------------------------------------------------------------------------------------------------------------------------------------------------------------------------------------------------------|-------|------------------------------|
| CTCAGATTGAACGCTGGCGGCAGGCTTAACACATGCAAGTCGAACGGTAGCAGGAAGAAAGCTTGCTTTTTTTGCTGACGAGTGCGCGGAC<br>GGGTGAGTAATGCTTGGGAATCTGGCTTATGGAGGGGGATAACTGTGGGAAACTGCAGCTAATACCGCGTATAATCGAGAGATGAAAGGG<br>TGGGACCGTAAGGCCACTTGCCATAAGATGAGCCCAAGTGGGATTAGGTAGTTGGTGGGGTAAAGGCCTACCAAGCCTGCGATCTCTAGC<br>TGGTCTGAGAGGATGGCCAGCCACACTGGGACTGAGACACGGCCCAGACTCTACGGGAGGCAGCAGTGGGGAATATTGCGCAATGGGG<br>GGAACCCTGACGCAGCCATGCCGCGTGAATGAAGAAGGCCCTTCGGGTTGTAAAGTTCTTTTCGGTGATGAGGAAGGGGTATTATTGAATAG<br>ATAATATCATTGACGTTAATTACAGAAGAAGCACCGGCTAACTCCGTGCCAGCAGCCGCGGTAATACGGAGGGTGCGAGCGTTAATCGGA<br>ATAACTGGGCGTAAAGGGCACGCAGGCGGACTTTTAAAGTGAGATGTGAAATCCCCGAGCTTAACTTGGGAACTGCATTTTCAGACTGGGAG<br>TCTAGAGTACTTTTAGGGAGGGGTAGAATTCCACGTGTAGCGGTGAAATGCGTAGAGATGTGGAGGAATACCGAAGGCGAAGGCAGCCCT<br>TGGGAATGTACTGACGCTCATGTGCGAAAGCGTGGGGAGCAAACAGGATTAGATACCCTGGTAGTCCACGCTGTAAACGCTGTCGATTTG<br>GGGATTGGACTTTATGTTTGGTGCCCGAAGCTAACGTGATAAATCGACCGCCTGGGGAGTACGGCCGCAAGGTTAAAACTCAAATGAATT<br>GACGGGGGCCCCACAAAGCGGTGGAGCATGTGGTTTAATTCGATGCAACGCGAAGAACCTTACCTACTCTTGACATCCTAAGAAGGGCTC<br>AGAGATGAGCTTGTGCCTTCGGGAACCTAGAGACAGGTGCTGCATGGCTGTCGTAGCTCGTGTTGTGAAATGTTGGGTAAAGTCCCGCAA<br>CGAGCGCAACCCCTTATCCTTTGTTGCCAGCGATTTGGTTCGGGAACCTAAAGGAGACTGCCAGTGACAACTGGAGGAAGGTGGGGATGAC<br>GTCAAGTCATCATGGCCCTTACGAGTAGGGCTACACACGTGCTACAATGGTGCATACAGAGGGCGGCGAGACGGCGACGTTGAGCGAATC<br>TCAGAAAAGTGCATCTAAGTCCGATTGGAGTCTGCAACTCGACTCCATGAAGTCGGAATCGCTAGTAATCGCAAATCAGAATGTTGCGGT<br>GAATACGTTCCCGGGCCTTGACACACCGCCCGTCACACCATGGGAGTGGGTTGTACCAGAAGTGGATAGCTTAACGGAAACGAGGGCGT<br>TCACCACGGTATGATTCATGACTGGGGTG                    | 99.73 | <i>Gemella palaticanis</i>   |
| CTCAGGACGAACGCTGGCGGCGTGCCTAATACATGCAAGTCGAGCGAGTTGAATAAGTGCTTGCACTAATTCAACTTAGCGGCGAACGG<br>GTGAGTAACACGTAAGAACCTGCCTCATAGACTGGGACAACACTTGGAACGGTAGCTAATACCAGATAACATATTTTTCTGCATGGAA<br>GAATATTGAAAGTCGGTCATGCTGACACTATGAGATGGCTTTGCGGTGCATTAGCTAGTTGGTAGGGTAAAGGCCTACCAAGGCAGCGAT<br>GCATAGCCGACCTGAGAGGGTGATCGGCCACACTGGGACTGAGACACGGCCCAGACTCTACGGGAGGCAGCAGTAGGGAATCTTCCGC<br>AATGGACGAAAGTCTGACGGAGCAACGCCGCGTGAGTGAAGAAGGATTTTCGGTTCGTAAAACTCTGTTGTTAGGGAAGAATGATTGTATA<br>GTAACATATACAGTAGAGACGGTACCCTAACCCAGAAAAGCCACGGCTAACTACGTGCCAGCAGCCGCGGTAATACGTAGGTGGCAAGCGTT<br>GTCCGGAATTATTGGGCGTAAAGCGCGCGCAGGTGGTTTAAAAAGTCTGATGTGAAAAGCCCACGGCTCAACCGTGGAAGGTCATTGGAAA<br>CTGTAAACTTGTAGTGCAGGAGAGAAAAAGTGGAATTCCTAGTGTAGCGGTGAAATGCGTAGAGATTAGGAGGAACACCAGTGGCGAAGG<br>CGGCTTTTTGCGCTGTAACCTGACACTGAGGCGCGAAAGCGTGGGGAGCAAACAGGATTAGATACCCTGGTAGTCCACGCTGTAAACGATG<br>AGTGCTAAGTGTTGGAGTCATAAGACTTCAGTGCTGCAGCTAACGCATTAAGCACTCCGCCTGGGGAGTACGGTCGCAAGACTGAAACTC<br>AAAGGAATTGACGGGGACCCGCACAAGCGGTGGAGTATGTGGTTTAATTTCGAAGCAACGCGAAGAACCTTACCAAGTCTTGACATACAGT<br>GAAGATTTAAGAGATTAGATTGTTTATACCTATGGTATAACACTGATACAGGTGGTGCATGGTTGTGTCGTAGCTCGTGTGCTGAGATGTTG<br>GGTTAAGTCCCGCAACGAGCGCAACCCCTTATATCTAGTTGCCAGCAGTAAGATGGGGACTCTAGATAGACTGCCAGTGATAAACTGGAGG<br>AAGGTGGGGATGACGTCAAATCATATGCCCTTATGACTTGGGCTACACACGTACTACAATGGATAGGAACAAAGAGAAGCAACCTCGC<br>AAGAGCAAGCCAACCTCATAAACTATTCTCAGTTCGGATTGTAGTCTGCAACTCGACTACATGAAGCTGGAATCGCTAGTAATCGCGAA<br>TCAGAATGTCGCGGTGAATACGTTCCCGGGTCTGTACACACCGCCCGTCACACCACGAGAGTTTGTAACACCCGAAGACGGTGGCCTAA<br>CCGCAAGGAGGGAGCCGGTACGGTGGGATAGATGATTGGGGTGAAGTCTAC | 100   | <i>Neisseria zoodegmatis</i> |

|                                                                                                                                                                                                                                                                                                                                                                                                                                                                                                                                                                                                                                                                                                                                                                                                                                                                                                                                                                                                                                                                                                                                                                                                                                                                                                                                                                                                                                                                                                                                                                                                                                      |       |                                               |
|--------------------------------------------------------------------------------------------------------------------------------------------------------------------------------------------------------------------------------------------------------------------------------------------------------------------------------------------------------------------------------------------------------------------------------------------------------------------------------------------------------------------------------------------------------------------------------------------------------------------------------------------------------------------------------------------------------------------------------------------------------------------------------------------------------------------------------------------------------------------------------------------------------------------------------------------------------------------------------------------------------------------------------------------------------------------------------------------------------------------------------------------------------------------------------------------------------------------------------------------------------------------------------------------------------------------------------------------------------------------------------------------------------------------------------------------------------------------------------------------------------------------------------------------------------------------------------------------------------------------------------------|-------|-----------------------------------------------|
| CTCAGATTGAACGCTGGCGGCAGGCTTAACACATGCAAGTCGAACGGTAGCAGGAAGAAAGCTTGCTTTTTTTGCTGACGAGTGCGCGGAC<br>GGGTGAGTAATGCTTGGGAATCTGGCTTATGGAGGGGGATAAAGTGTGGGAACTGCAGCTAATACCGCGTATAATCGAGAGATGAAAGGG<br>TGGGACCGTAAGGCCACTTGCCATAAGATGAGCCCAAGTGGGATTAGGTAGTTGGTGGGGTAAAGGCCTACCAAGCCTGCGATCTCTAGC<br>TGGTCTGAGAGGATGGCCAGCCACACTGGGACTGAGACACGGCCCAGACTCTACGGGAGGCAGCAGTGGGGAATATTGCGCAATGGGG<br>GGAACCCTGACGCAGCCATGCCGCGTGAATGAAGAAGGCCCTTCGGGTTGTAAAGTTCTTTTCGGTGATGAGGAAGGGGTATTATTGAATAG<br>ATAATATCATTGACGTTAATTACAGAAGAAGCACCGGGTAACCTCGTGCCAGCAGCCGCGGTAATACGGAGGGTGCGAGCGTTAATCGGA<br>ATAACTGGGCGTAAAGGGCACGCAGGCGGACTTTTAAAGTGAGATGTGAAATCCCCGAGCTTAACTTGGGAACTGCATTTTCAGACTGGGAG<br>TCTAGAGTACTTTAGGGAGGGGTAGAATTCACGTGTAGCGGTGAAATGCGTAGAGATGTGGAGGAATACCGAAGGCGAAGGCAGCCCT<br>TGGGAATGTACTGACGCTCATGTGCGAAAGCGTGGGGAGCAAAACAGGATTAGATACCCTGGTAGTCCACGCTGTAAACGCTGTCGATTTG<br>GGGATTGGACTTTATGTTTGGTGCCCGAAGCTAACGTGATAAATCGACCGCCTGGGGAGTACGGCCGCAAGGTTAAAACTCAAATGAATT<br>GACGGGGGCCCCACAAAGCGGTGGAGCATGTGGTTTAATTCGATGCAACGCGAAGAACCTTACCTACTCTTGACATCCTAAGAAGGGCTC<br>AGAGATGAGCTTGTGCCTTCGGGAACCTAGAGACAGGTGCTGCATGGCTGTCGTAGCTCGTGTGTGAAATGTTGGGTAAAGTCCCGCAA<br>CGAGCGCAACCCCTTATCCTTTGTTGCCAGCGATTTGGTTCGGGAACCTAAAGGAGACTGCCAGTGACAACTGGAGGAAGGTGGGGATGAC<br>GTCAAGTCATCATGGCCCTTACGAGTAGGGCTACACACGTGCTACAATGGTGCATACAGAGGGCGGCGAGACGGCGACGTTGAGCGAATC<br>TCAGAAAAGTCATCTAAGTCCGGATTGGAGTCTGCAACTCGACTCCATGAAGTCGGAATCGCTAGTAATCGCAAATCAGAATGTTGCGGT<br>GAATACGTTCCCGGGCCTTGTAACACCCGCCCGTCACACCATGGGAGTGGGTTGTACCAGAAGTGGATAGCTTAACGGAAACGAGGGCGT<br>TCACCACGGTATGATTCATGACTGGGGTG                                      | 100   | <i>Pasteurella canis</i>                      |
| TTTAGAGTTTGGATCATGGCTCAGATTGAACGCTGGCGGCAGGCTTAACACATGCAAGTCGAACGGTAGCAGGAAGAAAGCTTGCTTTCTT<br>TGCTGACGAGTGCGGGACGGGTGAGTAATGCTTGGGAATCTGGCTTATGGAGGGGGATAAAGTGCAGGAACTGCAGCTAATACCGCGTAT<br>TATCGAGAGATGAAAGGGTGGGACCTTAGGGCCACCTGCCATAAGATGAGCCCAAGTGGGATTAGGTAGTTGGTGGGGTAAAGGCCTACC<br>AAGCCGACGATCTCTAGCTGGTCTGAGAGGATGACCAGCCACACTGGGACTGAGACACGGCCCAGACTCTACGGGAGGCAGCAGTGGG<br>GAATATTGCGCAATGGGGGGAACCCTGACGCAGCCATGCCGCGTGAATGAAGAAGGCCCTTCGGGTTGTAAAGTTCTTTTCGGTAATGAGGA<br>AGGGGTATTATTGAATAGATAATATCATTGACGTTAATTACAGAAGAAGCACCGGCTAACTCCGTGCCAGCAGCCGCGGTAATACGGAGG<br>GTGCGAGCGTTAATCGGAATAACTGGGCGTAAAGGGCACGCAGGCGGGCTTTTAAAGTGAGATGTGAAATCCCCGAGCTTAACTTGGGAAC<br>TGCATTTTCAGACTGGGAGTCTAGAGTACTTTAGGGAGGGGTAGAATTCCACGTGTAGCGGTGAAATGCGTAGAGATGTGGAGGAATACCG<br>AAGGCGAAGGCAGCCCCCTTGGGAATGTACTGACGCTCATGTGCGAAAAGGMRTGRGGAGCAAAACAGGATTAGATACCCTGGTAGTCCAC<br>GCTGTAAACGCTGTGCAATTTGGGGATTGGGCTTTATGCTTGGTGCCCGAAGCTAACGTGATAAATCGACCGCCTGGGGAGTACGGCCGCA<br>AGGTTAAAACTCAAATGAATTGACGGGGGCCCGCACAAAGCGGTGGAGCATGTGGTTTAATTCGATGCAACGCGAAGAACCCTTACCTACTC<br>TTGACATCCTAAGAAGAGCTCAGAGATGAGCTTGTGCCTTCGGGAACCTTAGAGACAGGTGCTGCATGGCTGTCGTCAGCTCGTGTGTGAA<br>ATGTTGGGTTAAGTCCCGCAACGAGCGCAACCCTTATCCTTTGTTGCCAGCGATTGTGTCGGGAACTCAAAGGAGACTGCCAGTGACAAA<br>CTGGAGGAAGGTGGGGATGACGTCAAGTCATCATGGCCCTTACGAGTAGGGCTACACACGTGCTACAATGGTGCATACAGAGGGCGGCGA<br>GACGGCGACGTTGAGCGAATCTCATAAAGTGCATCTAAGTCCGGATTGGAGTCTGCAACTCGACTCCATGAAGTCGGAATCGCTAGTAAT<br>CGCAAATCAGAATGTTGCGGTGAATACGTTCCCGGGCCTTGTAACACCCGCCCGTCACACCATGGGAGTGGGTTGTACCAGAAGTGGATA<br>GCTTAACGGAAACGAGGGCGTTACCACGGTATGATTCATGACTGGGGTGAAGTCGTACAG | 99.53 | <i>Pasteurella multocida subsp. multocida</i> |

|                                                                                                                                                                                                                                                                                                                                                                                                                                                                                                                                                                                                                                                                                                                                                                                                                                                                                                                                                                                                                                                                                                                                                                                                                                                                                                                                                                                                                                                                                                                                                                                                       |       |                               |
|-------------------------------------------------------------------------------------------------------------------------------------------------------------------------------------------------------------------------------------------------------------------------------------------------------------------------------------------------------------------------------------------------------------------------------------------------------------------------------------------------------------------------------------------------------------------------------------------------------------------------------------------------------------------------------------------------------------------------------------------------------------------------------------------------------------------------------------------------------------------------------------------------------------------------------------------------------------------------------------------------------------------------------------------------------------------------------------------------------------------------------------------------------------------------------------------------------------------------------------------------------------------------------------------------------------------------------------------------------------------------------------------------------------------------------------------------------------------------------------------------------------------------------------------------------------------------------------------------------|-------|-------------------------------|
| CTCAGATTGAACGCTGGCGGCAGGCTTAACACATGCAAGTCGAACGATGATTACTAGCTTGCTAGTATGATTAGTGGCGAACGGGTGAGT<br>AATGCTTAGGAATCTGCCTATTAGTGGGGGACAACATTCCGAAAGGAATGCTAATACCGCATACGTCCTACGGGAGAAAAGCAGGGGATCG<br>CAAGACCTTGGCTAATAGATGAGCCTAAGTCGGATTAGCTAGTTGGTGGGGTAAAGGCCTACCAAGGCGACGATCTGTAGCTGGTCTGA<br>GAGGATGATCAGCCACACTGGGACTGAGACACGGCCAGACTCCTACGGGAGGCAGCAGTGGGGAATATTGGACAATGGGCGAAAAGCCT<br>GATCCAGCCATGCCCGTGTGTGAAGAAGGCCTTTTGGTTGTAAAGCACTTTAAGTGGGGAGGAAAAGCTAATAATTAATACCTATTAGC<br>CCTGACGTTACCCACAGAATAAGCACCGGCTAACTCTGTGCCAGCAGCCGCGTAATACAGAGGGTGC AAGCGTTAATCGGAATTACTGG<br>GCGTAAAGCGAGCGTAGGTGGTTACTTAAGTCAGATGTGAAAGCCCCGGGCTTAACCTGGGAACTGCATCTGATACTGGGTAAC TAGAGT<br>AGGTGAGAGGGAAGTAGAATTCCAGGTGTAGCGGTGAAATGCGTAGAGATCTGGAGGAATACCGATGGCGAAGGCAGCTTCCTGGCATC<br>ATACTGACACTGAGGTTGAAAAGCGTGGGTAGCAAACAGGATTAGATACCCTGGTAGTCCACGCCGTAACGATGTCTACCAAGTCGTTGG<br>GTCTTTTAAAGACTTAGTGACGCAGTTAACGCAATAAGTAGACCGCTGGGGAGTACGGCCGCAAGGTTAAAACTCAAATGAATTGACGG<br>GGGCCCGCAC AAGCGGTGGAGCATGTGGTTTAATTTCGATGCAACGCGAAGAACCTTACCTGGTCTTGACATAGTAGGAATCCTGCAGAGA<br>TGCGGGAGTGCCTTCGGGAATCTACATACAGGTGCTGCATGGCTGTCTCAGCTCGTGTCTGTGAGATGTTGGGTAAAGTCCCGCAACGAGC<br>GCAACCTTTTCCTTAGTTACCAAGCGGGTTATGCCGGGAACCTTAAGGATACTGCCAGTGACAAACTGGAGGAAGGCGGGGACGACGTCA<br>AGTCATCATGGCCCTTACGACCAGGGCTACACACGTGTACAATGGTAGGTACAAAGGGTTGCTACACAGCGATGTGATGCTAATCTCAA<br>AAAGCCTATCGTAGTCCGGATTGGAGTCTGCAACTCGACTCCATGAAGTCGGAATCGCTAGTAATCGCAGATCAGAATGCTGCGGTGAAT<br>ACGTTCCCGGGCCTTGATACACACCGCCCGTCACACCATGGGAGTTGATCTCACCAGAAGTGGGTAGCCTAACGCAAGAGGGCGCTCACCA<br>CGGTGGGGTCGATGACTGGGGTGAAGTCGTACAAGGG | 99.53 | <i>Moraxella sp.</i>          |
| GGCGGCAGGCCTAACACATGCAAGTCGAGCGGATGAAGGGAGCTTGCTCCTGGATTACGCGGCGACGGGTGAGTAATGCCTAGGAATCT<br>GCCTGGTAGTGGGGGATAACGTCCGGAACGGGCGCTAATACCGCATACGTCCTGAGGGAGAAAAGTGGGGGATCTTCGGACCTCACGCTA<br>TCAGATGAGCCTAGGTCGGATTAGCTAGTTGGTGGGGTAAAGGCCTACCAAGGCGACGATCCGTAAC TGGTCTGAGAGGATGATCAGTCA<br>CACTGGAAC TGAGACACGGTCCAGACTCCTACGGGAGGCAGCAGTGGGGAATATTGGACAATGGGCGAAAGCCTGATCCAGCCATGCCG<br>CGTGTGTGAAGAAGGTCTTCGGATTGTAAAGCACTTTAAGTTGGGAGGAAGGGCAGTAAGTTAATACCTTGCTGTTTTGACGTTACCAACA<br>GAATAAGCACCGGCTAACTTCGTGCCAGCAGCCGCGTAATACGAAGGGTGCAAGCGTTAATCGGAATTACTGGGCGTAAAGCGCGCGTA<br>GGTGGTTTCAGCAAGTTGGATGTGAAATCCCCGGGCTCAACCTGGGAACTGCATCCAAA ACTACTGAGCTAGAGTACGGTAGAGGGTGGTG<br>GAATTTCTGTGTAGCGGTGAAATGCGTAGATATAGGAAGGAACACCAAGTGGCGAAGGCGACCCTGGACTGATACTGACACTGAGGTG<br>CGAAAGCGTGGGGAGCAAACAGGATTAGATACCCTGGTAGTCCACGCCGTAAACGATGTCGACTAGCCGTTGGGATCCTTGAGATCTTAG<br>TGGCGCAGCTAACGCGATAAGTCGACCGCCTGGGGAGTACGGCCGCAAGGTTAAAACTCAAATGAATTGACGGGGGCCCCGACAAGCGG<br>TGGAGCATGTGGTTTAATTGGAAGCAACGCGAAGAACCTTACCTGGCCTTGACATGCTGAGAACTTCCAGAGATGGATTGGTGCCTTCGG<br>GAACTCAGACACAGGTGCTGCATGGCTGTCTCAGCTCGTGTCTGTGAGATGTTGGGTAAAGTCCCCTAACGAGCGCAACCTTGTCTTAG<br>TTACCAGCACCTCGGGTGGGCACTCTAAGGAGACTGCCGGTGACAAACCGGAGGAAGGTGGGGATGACGTCAAGTCATCATGGCCCTTAC<br>GGCCAGGGCTACACACGTGCTACAATGGTCCGTACAAAGGGTTGCCAAGCCGCGAGGTGGAGCTAATCCCATAAAACCGATCGTAGCCG<br>GATCGCAGTCTGCAACTCGACTGCGTGAAGTCGGAATCGCTAGTAATCGTGAATCAGAATGTCACGGTGAATACGTTCCCGGGCCTTGTA<br>CACACCGCCCGTCACACCATGGGAGTGGGTTGCTCCAGAAGTAGCTAGTCTAACC GCAAGGGGGACGGTTACCACGGAGTGATT CAT                                              | 100   | <i>Pseudomonas aeruginosa</i> |

|                                                                                                                                                                                                                                                                                                                                                                                                                                                                                                                                                                                                                                                                                                                                                                                                                                                                                                                                                                                                                                                                                                                                                                                                                                                                                                                                                                                                                                                                                                                                                                                                                                                    |       |                                               |
|----------------------------------------------------------------------------------------------------------------------------------------------------------------------------------------------------------------------------------------------------------------------------------------------------------------------------------------------------------------------------------------------------------------------------------------------------------------------------------------------------------------------------------------------------------------------------------------------------------------------------------------------------------------------------------------------------------------------------------------------------------------------------------------------------------------------------------------------------------------------------------------------------------------------------------------------------------------------------------------------------------------------------------------------------------------------------------------------------------------------------------------------------------------------------------------------------------------------------------------------------------------------------------------------------------------------------------------------------------------------------------------------------------------------------------------------------------------------------------------------------------------------------------------------------------------------------------------------------------------------------------------------------|-------|-----------------------------------------------|
| ATCATGGCTCAGATTGAACGCTGGCGGCAGGCTTAACACATGCAAGTCGAACGGTAGCAGGGAGAAAGCTTGCTTCTTTGCTGACGAGT<br>GGCGGACGGGTGAGTAATGCTTGGGAATCTGGCTTATGGAGGGGGATAACTGTGGGAAACTGCAGCTAATACCGCGTATTATCGAGAGAT<br>GAAAGGGTGGGACCTTCGGGCCACCTGCCATGAGATGAGCCCAAGTGGGATTAGGTAGTTGGTGGGGTAAAGGCCTACCAAGCCGACGAT<br>CTCTAGCTGGTCTGAGAGGATGACCAGCCACACTGGGACTGAGACACGGCCCAGACTCCTACGGGAGGCAGCAGTGGGGAATATTGCGC<br>AATGGGGGGAACCTGACGCAGCCATGCCGCGTGAATGAAGAAGGCC TTCGGTTGTAAAGTCTTTTCGGTAATGAGGAAGGGGTATTAT<br>TGAATAGATAATATCATTTGACGTTAATTACAGAAGAAGCACCGGCTAACTCCGTGCCAGCAGCCGCGGTAATACGGAGGGTGCGAGCGTT<br>AATCGGAATAACTGGGCGTAAAGGGCACGCAGGCGGACTTTTAAAGTGAGATGTGAAATCCCCGAGCTTAACTTGGGAACTGCATTTCA<br>CTGGGAGTCTAGAGTACTTTAGGGAGGGGTAGAATTCCACGTGTAGCGGTGAAATGCGTAGAGATGTGGAGGAATACCGAAGGCGAAGG<br>CAGCCCTTGGAATGTACTGACGCTCATGTGCGAAAGCGTGGGGAGCAAACAGGATTAGATACCCTGGTAGTCCACGCTGTAAACGCTG<br>TCGATTTGGGGATTGGACTTAATGTTTGGTGCCCGAAGCTAACGTGATAAATCGACCGCTGGGGAGTACGGCCGCAAGGTTAAAACTCA<br>AATGAATTGACGGGGGCCCCGACAAGCGGTGGAGCATGTGGTTTAAATTCGATGCAACGCGAAGAACCCTTACCTACTCTTGACATCCTAAG<br>AAGAGCTCAGAGATGAGCTTGTGCCCTTCGGGAACCTTAGAGACAGGTGCTGCATGGCTGTCTGCAGCTCGTGTGTGAAATGTTGGGTTAAG<br>TCCCGCAACGAGCGCAACCCCTTATCCTTTGTTGCCAGCGATTGGTTCGGGAACCTCAAAGGAGACTGCCAGTGATAAACTGGAGGAAGGTG<br>GGGATGACGTCAAGTCATCATGGCCCTTACGAGTAGGGCTACACACGTGTACAATGGTGCATACAGAGGGCGGCGAGACGCGACGTTG<br>AGCGAATCTCATAAAGTGCATCTAAGTCCGGATTGGAGTCTGCAACTCGACTCCATGAAGTCGGAATCGCTAGTAATCGCAAATCAGAAT<br>GTTGCGGTGAATACGTTCCCGGCCCTTGTAACACCCGCCGTCACACCATGGGAGTGGGTTGTACCAGAAGTGGATAGCTTAACGGAAAC<br>GAGGGCGTTTACCACGGTATGATTCATGACTGGGGTGAAGTCGTACA                                        | 99.46 | <i>Pasteurella multocida subsp. multocida</i> |
| TTTAGAGTTTGAATCATGGCTCAGGATGAACGCTGGCGGCGTGCCTAATACATGCAAGTCGAGCGAACAGATAAGGAGCTTGCTCCTTTG<br>ACGTTAGCGGCGGACGGGTGAGTAACACGTGGGTAACCTACCTATAAGACTGGAATAACTCCGGGAAACCGGGGCTAATGCCGGATAAC<br>ATGTTGAACCGCATGGTTCTACAGTGAAAGACGGTCTTGCTGTCACTTATAGATGGACCCGCGCCGTATTAGCTAGTTGGTGGGGTAACGG<br>CCTACCAAGGCGACGATACGTAGCCGACCTGAGAGGGTGATCGGCCACACTGGAAGTGAAGACACGCTCCAGACTCCTACGGGAGGCAGC<br>AGTAGGGAATCTTCCGCAATGGGCGAAAGCCTGACGGAGCAACGCCGCGTGAGTGATGAAGGTCTTCGGATCGTAAAGCTCTGTTGTTAG<br>GGAAGAACAAATGTGTAAGTAACGTGTGCACATCTTGACGGTACCTAACCGAAGCCACGGCTAACTACGTGCCAGCAGCCGCGGTAATA<br>CGTAGGKGSAAAGCGYTATCCGGAATTATTGGGCGTAAAGCGCGCGTAGGCGGTTTTTTAAAGTCTGATGTGAAAGCCCCACGGCTCAACCG<br>TGGAGGGTCATTGGAACTGGAAAACCTTGAGTGCAGAAGAGGAAAGTGAATTCATGTGTAGCGGTGAAATGCGCAGAGATATGGAGG<br>AACACCAAGTGGCGAAGGCGGCTTTCTGGTCTGCAACTGACGCTGATGTGCGAAAGCGWRGSSATCAAACAGGATTAGATACCCTGGTAGT<br>CCACGCCGTAACCGATGAGTGCTAAGTGTTAGGGGGTTTCCGCCCTTAGTGCTGCAGCTAACGCATTAAGCACTCCGCCTGGGGAGTAC<br>GGTCGCAAGACTGAAACTCAAAGGAATTGACGGGGACCCGCAACAAGCGGTGGAGCATGTGGTTTAAATTCGAAGCAACGCGAAGAACCCTT<br>ACCAAATCTTGACATCCTTTGACCGCTCTAGAGATAGAGTTTTCTCTTCCGAGGACAAAGTGACAGGTGGTGCATGGTTGTCGTCAGCTC<br>GTGTCGTGAGATGTTGGGTTAAGTCCCGCAACGAGCGCAACCCCTTGAACCTTAGTTGCCATCATTCAGTTGGGCACTCTAAGTTGACTGCCG<br>GTGACAAACCGGAGGAAGGTGGGGATGACGTCAAATCATCATGCCCTTATGATTTGGGCTACACACGTGCTACAATGGACAATACAAAG<br>GGCAGCGAAACCGCGAGGTCAAGCAAATCCCATAAAGTTGTTCTCAGTTCCGATTGTAGTCTGCAACTCGACTACATGAAGCTGGAATCG<br>CTAGTAATCGTAGATCAGCATGCTACGGTGAATACGTTCCCGGGTCTGTACACACCCGCCGTCACACCAGGAGTTTGTAACACCCGA<br>AGCCGGTGGAGTAACCATTTTGGAGCTAGCCGTCGAAGGTGGGACAAATGATTGGGGTGAAGTCGTACAGGGGAAACCGTAAA | 100   | <i>Staphylococcus pseudintermedius</i>        |

|                                                                                                                                                                                                                                                                                                                                                                                                                                                                                                                                                                                                                                                                                                                                                                                                                                                                                                                                                                                                                                                                                                                                                                                                                                                                                                                                                                                                                                                                                                                                                                                                                                               |       |                                               |
|-----------------------------------------------------------------------------------------------------------------------------------------------------------------------------------------------------------------------------------------------------------------------------------------------------------------------------------------------------------------------------------------------------------------------------------------------------------------------------------------------------------------------------------------------------------------------------------------------------------------------------------------------------------------------------------------------------------------------------------------------------------------------------------------------------------------------------------------------------------------------------------------------------------------------------------------------------------------------------------------------------------------------------------------------------------------------------------------------------------------------------------------------------------------------------------------------------------------------------------------------------------------------------------------------------------------------------------------------------------------------------------------------------------------------------------------------------------------------------------------------------------------------------------------------------------------------------------------------------------------------------------------------|-------|-----------------------------------------------|
| ATCATGGCTCAGATTGAACGCTGGCGGCAGGCTTAACACATGCAAGTCGAACGGTAGCAGGGAGAAAGCTTGCTTCTTTGCTGACGAGT<br>GGCGGACGGGTGAGTAATGCTTGGGAATCTGGCTTATGGAGGGGGATAACTGTGGGAAACTGCAGCTAATACCGCGTATTATCGAGAGAT<br>GAAAGGGTGGGACCTTCGGGCCACCTGCCATGAGATGAGCCCAAGTGGGATTAGGTAGTTGGTGGGGTAAAGGCCTACCAAGCCGACGAT<br>CTCTAGCTGGTCTGAGAGGATGACCAGCCACACTGGGACTGAGACACGGCCCAGACTCCTACGGGAGGCAGCAGTGGGGAATATTGCGC<br>AATGGGGGGAACCTGACGCAGCCATGCCGCGTGAATGAAGAAGGCCCTTCGGGTTGTAAAGTTCTTTTCGGTAATGAGGAAGGGGTATTAT<br>TGAATAGATAATATCATTTGACGTTAATTACAGAAGAAGCACCGGCTAACTCCGTGCCAGCAGCCGCGGTAATACGGAGGGTGCGAGCGTT<br>AATCGGAATAACTGGGCGTAAAGGGCACGCAGGCGGACTTTTAAAGTGAGATGTGAAATCCCCGAGCTTAACTTGGGAACTGCATTTTCA<br>CTGGGAGTCTAGAGTACTTTTAGGGAGGGGTAGAATTCCACGTGTAGCGGTGAAATGCGTAGAGATGTGGAGGAATACCGAAGGCGAAGG<br>CAGCCCTTGGGAATGTACTGACGCTCATGTGCGAAAGCGTGGGGAGCAAACAGGATTAGATACCCTGGTAGTCCACGTGTAAACGCTG<br>TCGATTTGGGGATTGGACTTAATGTTTGGTGCCCGAAGCTAACGTGATAAATCGACCGCTGGGAGTACGGCCGCAAGGTTAAAACTCA<br>AATGAATTGACGGGGGCCCCGACAAGCGGTGGAGCATGTGGTTTAAATTCGATGCAACGCGAAGAACCTTACCTACTCTTGACATCCTAAG<br>AAGAGCTCAGAGATGAGCTTGTGCCTTCGGGAACCTTAGAGACAGGTGCTGCATGGCTGTCTGCAGCTCGTGTGTGAAATGTTGGGTTAAG<br>TCCCGCAACGAGCGCAACCCCTTATCCTTTGTTGCCAGCGATTGGTTCGGGAACCTCAAAGGAGACTGCCAGTGATAAACTGGAGGAAGGTG<br>GGGATGACGTCAAGTCATCATGGCCCTTACGAGTAGGGCTACACACGTGTACAATGGTGCATACAGAGGGCGGCGAGACGCGACGTTG<br>AGCGAATCTCATAAAGTGCATCTAAGTCCGGATTGGAGTCTGCAACTCGACTCCATGAAGTCGGAATCGCTAGTAATCGCAAATCAGAAT<br>GTTGCGGTGAATACGTTCCCGGCCCTTGTAACACCCGCCGTCACACCATGGGAGTGGGTTGTACCAGAAGTGGATAGCTTAACGGAAAC<br>GAGGGCGTTTACCACGGTATGATTCATGACTGGGGTGAAGTCGTACA                                  | 99.46 | <i>Pasteurella multocida subsp. multocida</i> |
| TTAGAGTTTGGAAATCATGGCTCAGATTGAACGCTGGCGGCATGCTTTACACATGCAAGTCGGACGGCAGCACAGAGAAGCTTGCTTCTTG<br>GGTGGCGAGTGGCGAACGGGTGAGTAATGCATCGGAACGTACCGAGTAGTGGGGGATAACTGTCCGAAAGGATGGCTAATACCGCATAC<br>GCTTTGAGAAGGAAAGCAGGGGCTCTTCGGACCTTGCGCTATTTCGAGCGGCCGATGTCTGATTAGCTGGTTGGTGGGGTAAAGGCCTACC<br>AAGGCGACGATCAGTAGCGGGTCTGAGAGGATGATCCGCCACACTGGGACTGAGACACGGCCCAGACTCCTACGGGAGGCAGCAGTGGG<br>GAATTTTGGACAATGGGCGCAAGCCTGATCCAGCCATGCCGCGTGTCTGAAGAAGGCCTTCGGGTTGTAAAGGACTTTTGTACGGGAAGA<br>AAAGGTTGTGGTTAATACCCATGACTGATGACGGTACCTGAAGAATAAGCACCGGCTAACTACGTGCCAGCAGCCGCGGTAATACGTAGG<br>GKGCSARCGTTAATCGGAATTACTGGGCGTAAAGCGGGCGCAGACGGTTACTTAAAGTCAGATGTGAAATCCCCGGGCTCAACCTGGGAAC<br>TGCGTTTGAACCTGGGTGACTAGAGTATGTCAGAGGGGGGTAGAATTCCACGTGTAGCAGTGAAATGCGTAGAGATGTGGAGGAATACCG<br>ATGGCGAAGGCAGCCCCCTGGGATAATACTGACGTTTATGCCCGAAAGMGKRRGTWSCAAAAGGATTAGATACCCTGGTAGTCCACGC<br>CCTAAACGATGTCAATTAGCTGTTGGGCAACTTGATTGCTTAGTAGCGTAGCTAACGCGTGAAATTGACCGCCTGGGGAGTACGGTCGCA<br>AGATTAAAACCTCAAAGGAATTGACGGGGACCCGCAACAAGCGGTGGATGATGTGGATTAAATTCGATGCAACGCGAAGAACCTTACCTGGTC<br>TTGACATGTACGGAATCCTCCAGAGACGGAGGAGTGCCTTCGGGAGCCGTAAACACAGGTGCTGCATGGCTGTCGTCAGCTCGTGTCTGA<br>GATGTTGGGTTAAGTCCCGCAACGAGCGCAACCCCTTGTCAATTAGTTGCCATCATTTGGTTGGGCACTCTAATGAGACTGCCGGTGACAAGC<br>CGGAGGAAGGTGGGGATGACGTCAAGTCCTCATGGCCCTTATGACCAGGGCTTCACACGTATACAATGGTCGGTACAGAGGGTAGCCAA<br>GCCGCGAGGTGGAGCCAATCCCACAAAACCGATCGTAGTCCGGATTGCACTCTGCAACTCGAGTGCATGAAGTCGGAATCGCTAGTAATC<br>GCAGGTCAGCATACTGCGGTGAATACGTTCCCGGGTCTTGTAACACCCGCCGTCACACCATGGGAGTGGGGGATACCAGAAGTAGGTAG<br>GGTAACCGCAAGGAGCCCGCTTACCACGGTATGCTTCATGACTGGGGTGAAGTCGTACAGGGGAAACCGTAAAT | 99.2  | <i>Neisseria zoodegmatis</i>                  |

|                                                                                                                                                                                                                                                                                                                                                                                                                                                                                                                                                                                                                                                                                                                                                                                                                                                                                                                                                                                                                                                                                                                                                                                                                                                                                                                                                                                                                                                                                                                                                                                                                                                                                                                                                                                                                                                                                                                                                                                                                                                                                                                                                                                                                                                                                                                                                                                                                                                                                                                                                                                                                                                                                                                                                                                                                                                                                                                                                                                                                                                                                                                                                                                            |       |                                               |
|--------------------------------------------------------------------------------------------------------------------------------------------------------------------------------------------------------------------------------------------------------------------------------------------------------------------------------------------------------------------------------------------------------------------------------------------------------------------------------------------------------------------------------------------------------------------------------------------------------------------------------------------------------------------------------------------------------------------------------------------------------------------------------------------------------------------------------------------------------------------------------------------------------------------------------------------------------------------------------------------------------------------------------------------------------------------------------------------------------------------------------------------------------------------------------------------------------------------------------------------------------------------------------------------------------------------------------------------------------------------------------------------------------------------------------------------------------------------------------------------------------------------------------------------------------------------------------------------------------------------------------------------------------------------------------------------------------------------------------------------------------------------------------------------------------------------------------------------------------------------------------------------------------------------------------------------------------------------------------------------------------------------------------------------------------------------------------------------------------------------------------------------------------------------------------------------------------------------------------------------------------------------------------------------------------------------------------------------------------------------------------------------------------------------------------------------------------------------------------------------------------------------------------------------------------------------------------------------------------------------------------------------------------------------------------------------------------------------------------------------------------------------------------------------------------------------------------------------------------------------------------------------------------------------------------------------------------------------------------------------------------------------------------------------------------------------------------------------------------------------------------------------------------------------------------------------|-------|-----------------------------------------------|
| <p>TTTAGAGTTTGATCATGGCTCAGAACGAACGCTGGCGGCAGGCCTAACACATGCAAGTCGAGCGAACCCCTTCGGGGTTAGCGGCGGACG<br/>GGTGAGTAACGCGTGGAACGTGCCCTTTGCTACGGAATAGCCCCGGGAAACTGGGAGTAATACCGTATACGCCCTTAGGGGAAAGATT<br/>TATCGGCAAGGGATCGGCCCGCTTGGAATTAGGTAGTTGGTGGGGTAATGGCCTACCAAGCCGACGATCCATAGCTGGTTTGAGAGGATG<br/>ATCAGCCACACTGGGACTGAGACACGGCCAGACTCCTACGGGAGGCAGCAGTGGGGAATCTTAGACAATGGGGGCAACCTGATCTAG<br/>CCATGCCGCGTGAGTGATGAAGGCCCTAGGGTTGTAAAGCTCTTTTCAGCTGGGAAGATAATGACGGTACCAGCAGAAGAAGCCCCGGCTA<br/>ACTCCGTGCCAGCAGCCGCGTAATAACKRGGGGGCTAGCGKTGTTCGGAATTACTGGGCGTAAAGCGCACGTAGGCGGACCAGAAAGTT<br/>GGGGGTGAAATCCCGGGGCTCAACCTCGGAAGTGCCTTCAAAACTATTGGTCTGGAGTTCGAGAGAGGTGAGTGGAAATCCGAGTGTAGA<br/>GGTGAAATTCGTAGATATTCGGAGGAACACAGTGCGGAAGGCGGCTCACTGGCTCGATACTGACGCTGAGGTGCGAAAGMGWRGSMG<br/>CAAACAGGATTAGATACCCTGGTAGTCCACGCCGTAAACGATGAATGCCAGTCGTCGGGCAGCATGCTGTTCCGTGACACACCTAACGGA<br/>TTAAGCATTCCGCCTGGGGAGTACGGTCGCAAGATTAATACTCAAAGGAATTGACGGGGGCCGCACAAGCGGTGGAGCATGTGGTTTAA<br/>TTCGAAGCAACGCGCAGAACCTTACCAACCCCTTGACATCCCCGGACCGGCCCTGGAGACAGGTCTTCCACTTCGTTGGCCGGGTGACAGGT<br/>GCTGCATGGCTGTCTCAGCTCGTGTCTGAGATGTTCCGGTTAAGTCCGGCAACGAGCGCAACCCACACTCTTAGTTGCCAGCATTTGGTT<br/>GGGCACCTCTAAGAGAACTGCCGATGATAAGTCGGAGGAAGGTGTGGATGACGTCAAGTCCTCATGGCCCTTACGGGTTGGGCTACACACG<br/>TGCTACAATGGTGGTGACAGTGGGTTAATCCCCAAAAGCCATCTCAGTTCGGATTGGGGTCTGCAACTCGACCCCATGAAGTTGGAATCG<br/>CTAGTAATCGCGGAACAGCATGCCGCGGTGAATACGTTCCCGGGCCTTGTAACACACCGCCCGTCACACCATGGGAGTTGGGTCTACCCGA<br/>CGGCCGTGCGCTAACCCAGCAATGGGGGCAGCGGACCACGGTAGGGCTACGCGACTGGGGTGAAGTCGTACAGGGGTAACCGTAAA<br/>CTCAGATTGAACGCTGGCGGCAGGCTTAACACATGCAAGTCGAACGGTAGCAGGGAGAAAGCTTGCTTTCTTTGCTGACGAGTGGCGGAC<br/>GGGTGAGTAATGCTTGGAATCTGGCTTATGGAGGGGGATAAAGTGTGGGAACTGCAGCTAATACCGCGTATTATCGGAAGATGAAAGGG<br/>TGGGACCTTCGGGCCACCTGCCATAAGATGAGCCCAAGTGGGATTAGGTAGTTGGTGGGGTAAGGGCCTACCAAGCCGACGATCTCTAGC<br/>TGGTCTGAGAGGATGACCAGCCACACTGGGACTGAGACACGCCCAGACTCTACGGGAGGCAGCAGTGGGGAATATTGCGCAATGGGG<br/>GGAACCCTGACGCAGCCATGCCGCGTGAATGAAGAAGGCCTTCGGGTGTAAAGTTCTTTCGGTAATGAGGAAGGGGTATTATTGAATAG<br/>ATAATATCATTGACGTTAATTACAGAAGAAGCACCGGCTAACTCCGTGCCAGCAGCCGCGGTAATACGGAGGGTGCGAGCGTTAATCGGA<br/>ATAACTGGGCGTAAAGGGCACGCAGGCGGACTTTTAAGTGAGATGTGAAATCCCCGAGCTTAAGTTGGGAACTGCATTTCAGACTGGGAG<br/>TCTAGAGTACTTTAGGGAGGGGTAGAATTCCACGTGTAGCGGTGAAATGCGTAGAGATGTGGAGGAATACCGAAGGCGAAGGCAGCCCT<br/>TGGGAATGTACTGACGCTCATGTGCGAAAGCGTGGGGAGCAACAGGATTAGATACCCTGGTAGTCCACGCTGTAAACGCTGTCTGATTG<br/>GGGATTGGGCTTTATGCTTGGTGCCCGAAGCTAACGTGATAAATCGACCGCCTGGGGAGTACGGCCGCAAGGTAAAACTCAAAATGAATT<br/>GACGGGGGCCCGCACAAAGCGGTGGAGCATGTGGTTAATTTCGATGCAACGCGAAGAACCTTACCTACTCTTGACATCCTAAGAAGAGCTC<br/>AGAGATGAGCTTGTGCCTTCGGGAACTTAGAGACAGGTGCTGCATGGCTGTCGTACGCTCGTGTGTGAAATGTTGGGTTAAGTCCCGCAA<br/>CGAGCGCAACCCCTTATCCTTTGTTGCCAGCGATTTGGTTCGGGAACTCAAAGGAGACTGCCAGTGACAAAAGTGGAGGAAGGTGGGGATGAC<br/>GTCAAGTCATCATGGCCCTTACGAGTAGGGCTACACACGTGCTACAATGGTGCATACAGAGGGCGGGCAGACGGCGACGTTGAGCGAATC<br/>TCATAAAGTGACATCTAAGTCCGATTGGAGTCTGCAACTCGACTCCATGAAGTCGGAATCGCTAGTAATCGCAAATCAGAATGTTGCGGT<br/>GAATACGTTCCCGGGCCTTGTAACACACCGCCCGTCACACCATGGGAGTGGGTTGTACCAGAAGTGGATAGCTTAACGGAAACGAGGGCGT<br/>TCACCACGGTATGATTTCATGACTGGGGTG</p> | 99.16 | <i>Paracoccus communis</i>                    |
| <p>CTCAGATTGAACGCTGGCGGCAGGCTTAACACATGCAAGTCGAACGGTAGCAGGGAGAAAGCTTGCTTTCTTTGCTGACGAGTGGCGGAC<br/>GGGTGAGTAATGCTTGGAATCTGGCTTATGGAGGGGGATAAAGTGTGGGAACTGCAGCTAATACCGCGTATTATCGGAAGATGAAAGGG<br/>TGGGACCTTCGGGCCACCTGCCATAAGATGAGCCCAAGTGGGATTAGGTAGTTGGTGGGGTAAGGGCCTACCAAGCCGACGATCTCTAGC<br/>TGGTCTGAGAGGATGACCAGCCACACTGGGACTGAGACACGCCCAGACTCTACGGGAGGCAGCAGTGGGGAATATTGCGCAATGGGG<br/>GGAACCCTGACGCAGCCATGCCGCGTGAATGAAGAAGGCCTTCGGGTGTAAAGTTCTTTCGGTAATGAGGAAGGGGTATTATTGAATAG<br/>ATAATATCATTGACGTTAATTACAGAAGAAGCACCGGCTAACTCCGTGCCAGCAGCCGCGGTAATACGGAGGGTGCGAGCGTTAATCGGA<br/>ATAACTGGGCGTAAAGGGCACGCAGGCGGACTTTTAAGTGAGATGTGAAATCCCCGAGCTTAAGTTGGGAACTGCATTTCAGACTGGGAG<br/>TCTAGAGTACTTTAGGGAGGGGTAGAATTCCACGTGTAGCGGTGAAATGCGTAGAGATGTGGAGGAATACCGAAGGCGAAGGCAGCCCT<br/>TGGGAATGTACTGACGCTCATGTGCGAAAGCGTGGGGAGCAACAGGATTAGATACCCTGGTAGTCCACGCTGTAAACGCTGTCTGATTG<br/>GGGATTGGGCTTTATGCTTGGTGCCCGAAGCTAACGTGATAAATCGACCGCCTGGGGAGTACGGCCGCAAGGTAAAACTCAAAATGAATT<br/>GACGGGGGCCCGCACAAAGCGGTGGAGCATGTGGTTAATTTCGATGCAACGCGAAGAACCTTACCTACTCTTGACATCCTAAGAAGAGCTC<br/>AGAGATGAGCTTGTGCCTTCGGGAACTTAGAGACAGGTGCTGCATGGCTGTCGTACGCTCGTGTGTGAAATGTTGGGTTAAGTCCCGCAA<br/>CGAGCGCAACCCCTTATCCTTTGTTGCCAGCGATTTGGTTCGGGAACTCAAAGGAGACTGCCAGTGACAAAAGTGGAGGAAGGTGGGGATGAC<br/>GTCAAGTCATCATGGCCCTTACGAGTAGGGCTACACACGTGCTACAATGGTGCATACAGAGGGCGGGCAGACGGCGACGTTGAGCGAATC<br/>TCATAAAGTGACATCTAAGTCCGATTGGAGTCTGCAACTCGACTCCATGAAGTCGGAATCGCTAGTAATCGCAAATCAGAATGTTGCGGT<br/>GAATACGTTCCCGGGCCTTGTAACACACCGCCCGTCACACCATGGGAGTGGGTTGTACCAGAAGTGGATAGCTTAACGGAAACGAGGGCGT<br/>TCACCACGGTATGATTTCATGACTGGGGTG</p>                                                                                                                                                                                                                                                                                                                                                                                                                                                                                                                                                                                                                                                                                                                                                                                                                                                                                                                                                                                                                                                                                                                                                                                                                                                                                                                                                                                                                                                                                                                                                                        | 99.59 | <i>Pasteurella multocida subsp. multocida</i> |

|                                                                                                                                                                                                                                                                                                                                                                                                                                                                                                                                                                                                                                                                                                                                                                                                                                                                                                                                                                                                                                                                                                                                                                                                                                                                                                                                                                                                                                                                                                                                                                                                                                                                                                                                                                                                                                                                                  |       |                              |
|----------------------------------------------------------------------------------------------------------------------------------------------------------------------------------------------------------------------------------------------------------------------------------------------------------------------------------------------------------------------------------------------------------------------------------------------------------------------------------------------------------------------------------------------------------------------------------------------------------------------------------------------------------------------------------------------------------------------------------------------------------------------------------------------------------------------------------------------------------------------------------------------------------------------------------------------------------------------------------------------------------------------------------------------------------------------------------------------------------------------------------------------------------------------------------------------------------------------------------------------------------------------------------------------------------------------------------------------------------------------------------------------------------------------------------------------------------------------------------------------------------------------------------------------------------------------------------------------------------------------------------------------------------------------------------------------------------------------------------------------------------------------------------------------------------------------------------------------------------------------------------|-------|------------------------------|
| <p>CATTAGAGTTGGATCATGGCTCAGATTGAACGCTGGCGGCATGCTTTACACATGCAAGTCGGACGGCAGCACAGAGAAGCTTGCTTCTTG<br/>GGTGGCGAGTGGCGAACGGGTGAGTAATGCATCGGAACGTACCGAGTAGTGGGGGATAACTGTCCGAAAGGATGGCTAATACCGCATAAC<br/>GCTTTGAGAAGGAAAGCAGGGGCTCTTCGGACCTTGCGCTATTTCGAGCGGCCGATGTCTGATTAGCTGGTTGGTGGGGTAAAGGCCTACC<br/>AAGGCGACGATCAGTAGCGGCTCTGAGAGGATGATCCGCCACACTGGGACTGAGACACGGCCCAGACTCCTACGGGAGGCAGCAGTGGG<br/>GAATTTTGGACAATGGGCGCAAGCCTGATCCAGCCATGCCGCGTGTCTGAAGAAGGCCTTCGGGTTGTAAGGACTTTTGTACAGGAAGA<br/>AAAGGTTGTGGTTAATACCCATGACTGATGACGGTACCTGAAGAATAAGCACCGGCTAACTACGTGCCAGCAGCCGCGGTAATACGTAGG<br/>GTSCGASC GTTAATCSGRATTACTGGGCGTAAAGCGGGGCGCAGACGGTTACTTAAGTCAGATGTGAAATCCCCGGGCTCAACCTGGGAACT<br/>GCGTTTGAAACTGGGTGACTAGAGTATGTCAGAGGGGGGTAGAATTCCACGTGTAGCAGTGAAATGCGTAGAGATGTGGAGGAATACCGA<br/>TGCGAAGGCAGCCCCCTGGGATAATACTGACGTTTCATGCCCGAAAGAAMGTSKGTAGCAAACAGGATTAGATACCTGGTAGTCCACGC<br/>CCTAAACGATGTCAATTAGCTGTTGGGCAACTTGATTGCTTAGTAGCGTAGCTAACGCGTGAAATTGACCGCCTGGGGAGTACGGTCGCA<br/>AGATTAAGAACTCAAAGGAATTGACGGGGACCCGCACAAGCGGTGGATGATGTGGATTAAATCGATGCAACGCGAAGAACCTTACCTGGTC<br/>TTGACATGTACGGAATCCTCCAGAGACGGAGGAGTGCCTTCGGGAGCTGTAACACAGGTGCTGCATGGCTGTCGTCAGCTCGTGTCTGTA<br/>GATGTTGGGTTAAGTCCCGCAACGAGCGCAACCCCTTGTCAATTAGTTGCCATCATTGGTTGGGCACTCTAATGAGACTGCCGGTGACAAGC<br/>CGGAGGAAGGTGGGGATGACGTCAGTCTCATGGCCCTTATGACCAGGGCTTCACACGTCATACAATGGTCGGTACAGAGGGTAGCCAA<br/>GCCGCGAGGTGGAGCCAAATCCCACAAAACCGATCGTAGTCCGGATTGCACTCTGCAACTCGAGTGCATGAAGTCGGAATCGCTAGTAATC<br/>GCAGGTCAGCATACTGCGGTGAATACGTTCCCGGGTCTTGTACACACCGCCCGTCACACCATGGGAGTGGGGGATACCAGAAGTAGGTAG<br/>GGTAACCGCAAGGAGCCCGCTTACCACGGTATGCTTCATGACTGGGGTGAAGTCGTAACAGGGTAACCGTAAA</p>                                                                                                                                                                                                              | 99.01 | <i>Neisseria zoodegmatis</i> |
| <p>ATTACGGTTACCTTGTTACGACTTCACCCAGTCATGAAGCATACCGTGGTAAAGCGGGCTCCTTGCGGTTACCTTACCTACTTCTGGTATC<br/>CCCCACTCCCATTGGTGTGACGGGCGGTGTGTACAAGACCCGGGAACGTATTACCCGAGTATGCTGACCTGCGATTACTAGCGATTCCGA<br/>CTCCATGCACTCGAGTTGCATTAGAGTTTGGATCTGGCTCAGATTGAACGCTGGCGGCATGCTTTACACATGCAAGTCGGACGGCAGCACA<br/>AAGAAGCTTGCTTCTTGGGTGGCGAGTGGCGAACGGGTGAGTAACGCATCGGAACGTACCGAGTAGTGGGGGATAACTGTCCGAAAGGAT<br/>GGCTAATACCGCATACGCTTTGAGAAGGAAAGCGGGGGATCTTCGGACCTCGCGCTATTCGAGCGGCCGATGTCTGATTAGCTGGTTGGT<br/>GGGGTAAAGGCCTACCAAGGCGACGATCAGTAGCGGCTCTGAGAGGATGATCCGCCACACTGGGACTGAGACACGGCCCAGACTCCTAC<br/>GGGAGGCAGCAGTGGGAATTTTGGACAATGGGCGCAAGCCTGATCCAGCCATGCCGCGTGTCTGAAGAAGGCCTTCGGGTTGTAAAGGA<br/>CTTTGTACAGGAAGAAAAGCTTGAGGCTAATACCCTTAAGTGATGACGGTACCTGAAGAATAAGCACCGGCTAACTACGTGCCAGCAGC<br/>CGCGGTAATACGTAGGGKCGCAGCGTTAATCGGAATTACTGGGCGTAAAGCGGGGCGCAGACGGTTACTTAAGTCAGATGTGAAATCCCCG<br/>GGCTCAACCTGGGAACTGCGTTTGAAACTGGGTAGCTAGAGTATGTCAGAGGGGGGTAGAATTCCACGTGTAGCAGTGAAATGCGTAGAG<br/>ATGTGGAGGAATWCCGATGGCGAAGGCAGCCCCCTGGGATAATACTGACGTTMATGCCSGAAAGCGTRGGTAGCAAACAGGATTAGATA<br/>CCCTGGTAGTCCACGCCCTAAACGATGTCAATTAGCTGTTGGGGCACTTGATGCCTTAGTAGCGTAGCTAACGCGTGAAATTGACCGCCTG<br/>GGGAGTACGGTCGCAAGATTAAGTCAAAAGGAATTGACGGGGACCCGCACAAGCGGTGGATGATGTGGATTAATTTCGATGCAACGCGA<br/>AGAACCTTACCTGGTCTTGACATGTACGGAATCCTCCAGAGACGAGGAGTGCCTTCGGGAGCCGTAAACACAGGTGCTGCATGGCTGTCTG<br/>TCAGCTCGTGTCTGAGATGTTGGGTTAAGTCCCGCAACGAGCGCAACCCCTTGTCATTAGTTGCCATCATTAAAGTTGGGCACTCTAATGAG<br/>ACTGCCGGTGACAAGCCGGAGGAAGGTGGGGATGACGTCAAAGTCCTATGGCCCTTATGACCAAGGGCTTCACACGTCATACAATGGTCGG<br/>TACAGAGGGTAGCCAAGCCGCGAGGTGGAGCCAATCCCACAAAACCGATCGTAGTCCGGATTGCACTCTGCAACTCGAGTGCATGAAGTC<br/>GGAATCGCTAGTAATCGCAGGTACGATACTGCGGTGAATACGTTCCCGGGTCTTGTACACACCGCCCGTCACACCATGGGAGTGGGGGA<br/>TACCAGAAGTAGGTAGGGTAACCGCAAGGAGCCCGCTTACCACGGTATGCTTCATGACTGGGGTGAAGTCGTACAGAGGAAACCGTAAA</p> | 99.59 | <i>Neisseria dumasiana</i>   |

|                                                                                                                                                                                                                                                                                                                                                                                                                                                                                                                                                                                                                                                                                                                                                                                                                                                                                                                                                                                                                                                                                                                                                                                                                                                                                                                                                                                                                                                                                                                                                                                                                           |       |                                  |
|---------------------------------------------------------------------------------------------------------------------------------------------------------------------------------------------------------------------------------------------------------------------------------------------------------------------------------------------------------------------------------------------------------------------------------------------------------------------------------------------------------------------------------------------------------------------------------------------------------------------------------------------------------------------------------------------------------------------------------------------------------------------------------------------------------------------------------------------------------------------------------------------------------------------------------------------------------------------------------------------------------------------------------------------------------------------------------------------------------------------------------------------------------------------------------------------------------------------------------------------------------------------------------------------------------------------------------------------------------------------------------------------------------------------------------------------------------------------------------------------------------------------------------------------------------------------------------------------------------------------------|-------|----------------------------------|
| CTCAGGACGAACGCTGGCGGCGTGCTTAACACATGCAAGTCGAACGATGAAGCCCAGCTTGCTGGGTGGATTAGTGGCGAACGGGTGAGT<br>AATACGTGAGTAACCTGCCTTTAACTCTGGGATAAGCCTTGGAACAGGTGCTAATACCGGATACGACTAGTTCCCGCATGGGATGCTGGT<br>GGAAAGGGATATGTACTGGTTTTAGATGGGCTCACGGCTATCAGCTTGTTGGTGAGGTAACGGCTACCAAGGCGACGACGGGTAGCCG<br>GCCTGAGAGGGTGACCGGCCACACTGGGACTGAGACACGGCCAGACTCCTACGGGAGGCAGCAGTGGGGAATATTGCACAATGGGCGC<br>AAGCCTGATGCAGCGACGCCGCTGAGGGATGACGGCCTTCGGGTGTGAAACCTCTTTCAGCAGGGAAGAAGCGAAAGTGACGGTACCTG<br>CAGAAGAAGCGCCGGCTAACTACGTGCCAGCAGCCGCGGTAATACGTAGGGCGCGAGCGTTGTCCGGAATTATTGGGCGTAAAGAGCTTG<br>TAGGCGGTTTGTGCGCTCTGCTGTGAAAGCCCGGGCTTAACCCCGGGTTTGCAGTGGGTACGGGCTAACTAGAGTGCAGTAGGGGAGAC<br>TGGAATTCCTGGTGTAGCGGTGAAATGCGCAGATATCAGGAGGAACCAATGGCGAAGGCAGGTCTCTGGGCTGTAACCTGACGCTGAGA<br>AGCGAAAGCATGGGGAGCAAAACAGGATTAGATACCCTGGTAGTCCATGCCGTAAACGTTGGGCACTAGGTGTGGGGGGCATTCCACGTTT<br>TCCGCGCCGTAGCTAACGCATTAAGTGCCCCGCTGGGGAGTACGGCCGCAAGGCTAAAACCTCAAAGAAATTGACGGGGGGCCGCACAA<br>GCGGCGGAGCATGCGGATTAATTTCGATGCAACGCGAAGAACCTTACCAAGGCTTGACATATACCGGACCGCTCTAGAGATAGAGTTTCCC<br>TTCGGGGCTGGTATACAGGTGGTGCATGGTTGTCGTCAGCTCGTGTGAGATGTTGGGTAAAGTCCCGCAACGAGCGCAACCCCTCGTTC<br>TATGTTGCCAGCACGTAATGGTGGGGACTCATAGGAGACTGCCGGGGTCAACTCGGAGGAAGGTGGGGATGACGTCAAATCATCATGCC<br>CTTATGTCTTGGGCTTCACGCATGCTACAATGGCCGGTACAAAGGGTTGCGTACTGTGAGGTTGAGCTAATCCCAAAAAGCCGGTCTCAG<br>TTCGGATTGGGGTCTGCAACTCGACCCCATGAAGTCGGAGTCGCTAGTAATCGCAGATCAGCAACGCTGCGGTGAATACGTTCCCGGGCC<br>TTGTACACACCGCCCGTCAAGTCACGAAAGTTGGTAACACCCGAGCCGATGGCCTAACCCCTTGTGGGAGGGAGTCGTC                                                                                 | 99.79 | <i>Rothia nasimurium</i>         |
| ATGGCTCAGATTGAACGCTGGCGGCAGGCTTAACACATGCAAGTCGAACGGTAGCAGGAGAAAGCTTGCTTTCTTGCTGACGAGTGGCGG<br>ACGGGTGAGTAATGCTTGGGAATCTGGCTTATGGAGGGGGATAACTACTGGAAACGGTAGCTAATACCGCGTAATATCGAGAGATTAAAG<br>ACTGGGACCTACGGGCCAGTTGCCATAAGATGAGCCCAAGTGGGATTAGGTAGTTGGTGGGGTAAAGGCCCTACCAAGCCCGCGATCTCTA<br>GCTGGTCTGAGAGGATGACCAGCCACACTGGAAGTGAACACGGTCCAGACTCCTACGGGAGGCAGCAGTGGGGAATATTGCACAATGG<br>GGGGAACCCCTGATGCAGCCATGCCGCGTGAATGAAGAAGGCCTTCGGGTGTGAAAGTTCTTTCGGTGGTGAGGAAGGTATCAACTTTAAT<br>AGAGTTGGTAATTGACGTTATCCACAGAAGAAGCACCGGCTAACTCCGTGCCAGCAGCCGCGGTAATACGGAGGGKGSAGCGTTAATCG<br>GAATGACTGGGCGTAAAGGGCACGCAGGCGGATGCTTAAGTGAGATGTGAAAGCCCCGGGCTTAACCTGGGAATTGCATTTTCAGACTGGG<br>CATCTAGAGTATTTTAGGGAGGGGTAGAATTCCACGTGTAGCGGTGAAATGCGTAGAGATGTGGAGGAATACCGAAGGCGAAGGCAGCCC<br>CTTGGGAATATACTGACGCTCATGTGCGAAAGCGTGGGGAGCAAAACAGGATTAGATACCCTGGTAGTCCACGCTGTAAACGATGTCGATT<br>TGGGGATTGGGGTATAACTCTGGTGCCCGAAGCTAACGTGATAAATCGACCGCCTGGGGAGTACGGCCGCAAGGTTAAAACTCAAATGAA<br>TTGACGGGGGGCCGCACAAGCGGTGGAGCATGTGGTTTAATTCGATGCAACGCGAAGAACCTTACCTACTCTTGACATCCATGGAAGTTT<br>GCAGAGATGTGAATGTCCCTTCGGGAACCATGAGACAGGTGCTGCATGGCTGTGCTCAGCTCGTGTGTGAAATGTTGGGTAAAGTCCCGC<br>AACGAGCGCAACCCCTTATCCTTTGTTGCCAGCGATTAGGTGCGGAACCTCAAAGGAGACTGCCAGTGATAAACTGGAGGAAGGTGGGGATG<br>ACGTCAAGTCATCATGGCCCTTACGAGTAGGGCTACACACGTGCTACAATGGTGCATACAGAGGGAAGCAATATGGCGACATGGAGCAAA<br>TCTCACAAAGTGACATCTAAGTCCGGATTGGAGTCTGCAACTCGACTCCATGAAGTCGGAATCGCTAGTAATCGCAAAATCAGAATGTTGCG<br>GTGAATACGTTCCCGGGCCTTGTAACACCCGCCGTCACACCATGGGAGTGGGTTGTACCAGAAGTAGATAGCTTAACCGCAAGGGGGG<br>GTTTACCACGATGATTTCATGACTGGGGTGAAGTCGTACAGAGGTAACCGTAAA | 99.2  | <i>Frederiksenia canicola</i>    |
| GGCTGCCTTTCGAGCTCAGCGTCAGTTACAGACCAGAGAGCCGCTTTCGCCACCGGTGTTCTCCTCATATATCTACGCATTTACCGCTACA<br>CATGGAATTCACCTCTCCCCTTCTGCACTCAAGTTCTCCAGTTTCCAAAGCATAACATTGGTTGAGCCAATGCCTTTAACTTCAGACTTAAAG<br>AACCGCCTGCGCTCGCTTTACGCCCAATAAAATCCGGACAACGCTCGGGACCTACGTATTACCGCGGCTGCTGGCACGTAGTTAGCCGTCC<br>CTTCTGTTGAGTTACCGTCACATAATGGGTTTTCCACTCCCATTACCGTTCTTCTCTAACAACAGAGCTTTACGATCCGAAAACCTTCTTC<br>ACTACGCGGCTTGCTCGGTACGGGTTCGCCCATTTGCCGAAGATTCCCTACTGCTGCCTCCGTAGGAGTCTGGCCGCTGTCTCAGTCC<br>CAGTGTGGCCGATCACCTCTCAGGTCGGCTATGTATCGTCGCTTGGTGAGCCTTTACCTCACCAACTAGCTAATACAACGCAGGTCCAT<br>CTCATAGTGGAGCAGTTGCCCTTTTAAAGTTCTTAAACATGTGTTAAGCACTTTTATGCGGTATTAGCTATCGTTTCCAATAGTTATCCCCG<br>CTATCAGGTAGGTTACCTACGCGTTACTACCCGTTTCGCAACTCCTTAGACTAGTGCAAGCACCTGTCTCAGCGTTCTACTTGCATGTATT<br>AGGCACGCCCGCAGCGTTCGTCCTGAGCCATATTCCAAACTCTAAAAA                                                                                                                                                                                                                                                                                                                                                                                                                                                                                                                                                                                                                                                                                                                                                                                    | 99.06 | <i>Streptococcus sp. (canis)</i> |

|                                                                                                                                                                                                                                                                                                                                                                                                                                                                                                                                                                                                                                                                                                                                                                                                                                                                                                                                                                                                                                                                                                                                                                                                                                                                                                                                                                                                                                                                                                                                                                               |       |                                        |
|-------------------------------------------------------------------------------------------------------------------------------------------------------------------------------------------------------------------------------------------------------------------------------------------------------------------------------------------------------------------------------------------------------------------------------------------------------------------------------------------------------------------------------------------------------------------------------------------------------------------------------------------------------------------------------------------------------------------------------------------------------------------------------------------------------------------------------------------------------------------------------------------------------------------------------------------------------------------------------------------------------------------------------------------------------------------------------------------------------------------------------------------------------------------------------------------------------------------------------------------------------------------------------------------------------------------------------------------------------------------------------------------------------------------------------------------------------------------------------------------------------------------------------------------------------------------------------|-------|----------------------------------------|
| TTAGAGTTTGAATCATGGCTCAGGATGAACGCTGGCGGCGTGCCTAATACATGCAAGTCGAGCGAACAGATAAGGAGCTTGCTCCTTTGACGTTAGCGGCGGACGGGTGAGTAACACGTGGGTAACTACCTATAAGACTGGAATAACTCCGGGAAACCGGGGCTAATGCCGGATAACATGTTGAACCCGATGGTTCTACAGTGAAAAGACGGTCTTGCTGTCACTTATAGATGGACCCGCGCGTATTAGCTAGTTGGTGGGGTAACGGCTACCAAGGCGACGATACGTAGCCGACCTGAGAGGGTGATCGGCCACACTGGAAGTACAGACAGGTCCAGACTCCTACGGGAGGCAGCAGTAGGGAATCTTCCGCAATGGGCGAAAGCCTGACGGAGCAACGCCGCGTGAGTGATGAAGGTCTTCGGATCGTAAAGCTCTGTTGTTAGGGAAGAACAATGTGTAAGTAAGTGTGCACATCTTGACGGTACCTAACCAGAAAGCCACGGCTAACTACGTGCCAGCAGCCGCGGTAATACGKRGGKGGSAASC GTTATCCGRATTATTGGGGCGTAAAGCGCGCGTAGGCGGTTTTTTAAGTCTGATGTGAAAGCCCACGGCTCAACCGTGGAGGGTCATTGGAAACTGGAAAACCTTGAGTGCAGAAAGAGGAAAGTGGAATTCCATGTGTAGCGGTGAAATGCGCAGAGATATGGAGGAAACACCAGTGGCGAAGGCGGCTTTCTGTCTGCAACTGACGCTGATGTGCGAAAGCGTGRSGMYCMAACAGGATTAGATACCCTGGTAGTCCACGCCGTAAACGATGAGTGCTAAGTGTTAGGGGGTTTCCGCCCTTAGTGCTGCAGCTAACGCATTAAGCACTCCGCTGGGGAGTACGGTCGCAAGACTGAAACTCAAAGGAATTGACGGGGACCCGCACAAGCGGTGGAGCATGTGGTTTAATTCGAAGCAACGCGAAGAACCTTACCAAATCTTGACATCCTTTGACCGCTCTAGAGATAGAGTTTTCTCTTCGGAGGACAAAGTGACAGGTGGTGCATGGTTGTCGTACAGCTCGTGTCTGTGAGATGTTGGGTTAAGTCCCGCAACGAGCGCAACCCTTGAACCTTGTGTCATCATTCAAGTTGGGCACTCTAAGTTGACTGCGGTTGACAAACCGGAGGAAGGTGGGGATGACGTCAAATCATGCCCCCTATGATTTGGGCTACACACGTGCTACAATGGACAATACAAAGGCGAGCGAAACCGCGAGGTCAAGCAAATCCCATAAAGTTGTTCTCAGTTCGGATTGTAGTCTGCAACTCGACTACATGAAGCTGGAATCGCTAGTAATCGTAGATCAGCATGTACGGTGAATACGTTCCCGGGTCTGTACACACCGCCCGTCACACCACGAGAGTTTGTAAACACCCGAAGCCGGTGGAGTAACCATTTTGGAGCTAGCCGTCGAAGGTGGGACAAATGATTGGGGTGAAGTCGTACAGGGGGTAACCGTAAA | 99.07 | <i>Staphylococcus pseudintermedius</i> |
| TTTAGAGTTTGATCATGGCTCAGATTGAACGCTGGCGGCATGCTTTACACATGCAAGTCGGACGGCAGCACAGAGAAGCTTGCTTCTTGGTGGCGAGTGGCGAACGGGTGAGTAATGCATCGGAACGTACCGAGTAGTGGGGGATAACTGTCCGAAAGGATGGCTAATACCGCATACGCTTTTGAGAAGGAAAGCAGGGGCTCTTCGGACCTTGCGCTATTCGAGCGGCCGATGTCTGATTAGCTGGTTGGTGGGGTAAAGGCCTACCAAGGCGACGATCAGTAGCGGTCTGAGAGGATGATCCGCCACACTGGGACTGAGACACGGCCCAGACTCCTACGGGAGGCAGCAGTGGGGAAATTTTGACAATGGGCGCAAGCCTGATCCAGCCATGCCGCGTGTCTGAAGAAGGCCTTCGGGTTGTAAAGGACTTTTGTACAGGAAGAAAGGTTGTGGTTAATACCCATGACTGATGACGGTACCCTGAAGAATAAGCACCCGGCTAACTACGTGCCAGCAGCCGCGGTAATACGTAGGCRTKYSMSCGTTAATCGGAATTACTGGGCGTAAAGCGGGCGCAGACGGTTACTTAAGTCAGATGTGAAATCCCCGGGCTCAACCTGGGAACTGCGTTTGAAACTGGGTGACTAGAGTATGTGAGAGGGGGTAGAATTCACGTGTAGCAGTGAAATGCGTAGAGATGTGGAGGAATACCGATGGCGAAGGCAGCCCCCTGGGATAATACTGACGTTTCATGCCCGAAAGGMRTGGGTAGCAAACAGGATTAGATACCCTGGTAGTCCACGCCCTAAACGATGTCAATTAGCTGTTGGGCAACTTGATTGCTTAGTAGCGTAGCTAACGCGTGAAATTGACCGCCTGGGGAGTACGGTCGCAAGATTAAAACCTCAAAGGAATTGACGGGGACCCGCACAAGCGGTGGATGATGTGGATTAATTTCGATGCAACGCGAAGAACCTTACCTGGTCTTGACATGTACGGAATCCTCCAGAGACGGAGGTGCCTTCGGGAGCCGTAAACAGGTGCTGCATGGCTGTCGTACGCTCGTGTCTGTGATGTTGGGTAAAGTCCCGCAACGAGCGCAACCCCTGTCAATTAGTTGCCATCATTTGGTTGGGCACTCTAATGAGACTGCCGGTGACAAGCCGAGGAAGGTGGGGATGACGTCAAGTCTCATGCCCCCTATGACCAGGGCTTCACACGTATACAATGGTCGGTACAGAGGGTAGCCAA GCCCGAGGTGGAGCCAATCCCACAAAACCGATCGTAGTCCGGATTGCACTCTGCAACTCGAGTGCATGAAGTCGGAATCGCTAGTAATCGCAGGTACAGCATACTGCGGTGAATACGTTCCCGGGTCTGTACACACCGCCCGTCACACCATGGGAGTGGGGGATACCAGAAGTAGGTAGGGTAACCGCAAGGAGCCCGCTTACCACGGTATGCTTCATGACTGGGGTGAAGTCGTAACAAGGGTAACCGTAAA          | 99.07 | <i>Neisseria zoodegmatis</i>           |

|                                                                                                                                                                                                                                                                                                                                                                                                                                                                                                                                                                                                                                                                                                                                                                                                                                                                                                                                                                                                                                                                                                                                                                                                                                                                                                                                                                                                                                                                                                                                                                                                                                                   |       |                                               |
|---------------------------------------------------------------------------------------------------------------------------------------------------------------------------------------------------------------------------------------------------------------------------------------------------------------------------------------------------------------------------------------------------------------------------------------------------------------------------------------------------------------------------------------------------------------------------------------------------------------------------------------------------------------------------------------------------------------------------------------------------------------------------------------------------------------------------------------------------------------------------------------------------------------------------------------------------------------------------------------------------------------------------------------------------------------------------------------------------------------------------------------------------------------------------------------------------------------------------------------------------------------------------------------------------------------------------------------------------------------------------------------------------------------------------------------------------------------------------------------------------------------------------------------------------------------------------------------------------------------------------------------------------|-------|-----------------------------------------------|
| CTCAGATTGAACGCTGGCGGCAGGCTTAACACATGCAAGTCGAACGGTAGCAGGGAGAAAGCTTGCTTTCTTTGCTGACGAGTGCGGAC<br>GGGTGAGTAATGCTTGGGAATCTGGCTTATGGAGGGGGATAACTGCGGGAAACTGCAGCTAATACCGCGTATTATCGGAAGATGAAAGGG<br>TGGGACCTTTCGGGCCACCTGCCATAAGATGAGCCCAAGTGGGATTAGGTAGTTGGTGGGGTAAGGGCCTACCAAGCCGACGATCTCTAGC<br>TGGTCTGAGAGGATGACCAGCCACACTGGGACTGAGACACGGCCCAGACTCTACGGGAGGCAGCAGTGGGGAATATTGCGCAATGGGG<br>GGAACCCTGACGCAGCCATGCCGCGTGAATGAAGAAGGCCTTCGGGTTGTAAAGTTCTTTTCGGTAATGAGGAAGGGGTATTATTGAATAG<br>ATAATATCATTGACGTTAATTACAGAAGAAGCACCGGCTAACTCCGTGCCAGCAGCCGCGGTAATACGAGGGGTGCGAGCGTTAATCGGA<br>ATAACTGGGCGTAAAGGGCACGCAGGCGGACTTTTAAAGTGAGATGTGAAATCCCCGAGCTTAACTTGGGAACATGCATTTGAGACTGGGAG<br>TCTAGAGTACTTTAGGGAGGGGTAGAATTCCACGTGTAGCGGTGAAATGCGTAGAGATGTGGAGGAATACCGAAGGCGAAGGCAGCCCT<br>TGGGAATGTACTGACGCTCATGTGCGAAAGCGTGGGGAGCAAACAGGATTAGATACCCTGGTAGTCCACGCTGTAAACGCTGTCGATTTG<br>GGGATTGGGCTTTATGCTTGGTGCCCGAAGCTAACGTGATAAATCGACCGCCTGGGGAGTACGGCCGCAAGGTTAAAACTCAAATGAATT<br>GACGGGGGCCCCGACAAAGCGGTGGAGCATGTGGTTTAATTCGATGCAACGCGAAGAACCTTACCTACTCTTGACATCCTAAGAAGAGCTC<br>AGAGATGAGCTTGTGCCTTCGGGAACCTAGAGACAGGTGCTGCATGGCTGTCGTGAGTCTCGTGTGTGAAATGTTGGGTAAAGTCCCGCAA<br>CGAGCGCAACCCTTATCCTTTGTTGCCAGCGATTTGGTTCGGGAACCTCAAAGGAGACTGCCAGTGACAACTGGAGGAAGGTGGGGATGAC<br>GTCAAGTCATCATGGCCCTTACGAGTAGGGCTACACACGTGCTACAATGGTGCATACAGAGGGCGGCGAGACGGCGACGTTGAGCGAATC<br>TCATAAAGTGACATCTAAGTCCGGATTGGAGTCTGCAACTCGACTCCATGAAGTCGGAATCGCTAGTAATCGCAAATCAGAATGTTGCGGT<br>GAATACGTTCCCGGGCCTTGACACACCGCCCGTCACACCATGGGAGTGGGTTGTACCAGAAGTGGATAGCTTAACGGAAACGAGGGCGT<br>TCACCACGGTATGATTCATGACTGGGGTG                                                  | 99.66 | <i>Pasteurella multocida subsp. multocida</i> |
| TTTTAGAGTTTGAATCATGGCTCAGGATGAACGCTGGCGGCGTGCCTAATACATGCAAGTCGAGCGAACAGATAAGGAGCTTGCTCCTTTG<br>ACGTTAGCGGCGGACGGGTGAGTAACACGTGGGTAACCTACCTATAAGACTGGAATAACTCCGGGAAACCGGGGCTAATGCCGGATAAC<br>ATGTTGAACCGCATGGTTCTACAGTGAAAGACGGTCTTGCTGTCACTTATAGATGGACCCGCGCCGTATTAGCTAGTTGGTGGGGTAACGG<br>CCTACCAAGGCGACGATACGTAGCCGACCTGAGAGGGTGATCGGCCACACTGGAAGTGAACACGCTCCAGACTCCTACGGGAGGCAGC<br>AGTAGGGAATCTTCCGCAATGGGCGAAAGCCTGACGGAGCAACGCCGCGTGAGTGATGAAGGTCTTCGGATCGTAAAGCTCTGTTGTTAG<br>GGAAGAACAAATGTGTAAGTAACGTGTGCACATCTTGACGGTACCTAACCCAGAAAGCCACGGCTAACTACGTGCCAGCAGCCGCGTAATA<br>CGTAKGKGSAAGCGTTATCCGGRATTATTGGGCGTAAAGCGCGCGTAGGCGGTTTTTTAAAGTCTGATGTGAAAGCCCACGGCTCAACCGT<br>GGAGGGTCATTGGAAGTGGAAAACCTTGAGTGCAGAAGAGGAAAGTGAATTCATGTGTAGCGGTGAAATGCGCAGAGATATGGAGGA<br>ACACCAAGTGGCGAAGGCGGCTTTCTGGTCTGCAACTGACCGCTGATGTGCGAAAGSGYGGSGATCAAACAGGATTAGATACCCTGGTAGT<br>CCACGCCGTAAACGATGAGTGCTAAGTGTTAGGGGGTTTCCGCCCCCTAGTGCTGCAGCTAACGCATTAAGCACTCCGCCTGGGGAGTAC<br>GGTCGCAAGACTGAAAACCTCAAAGGAATTGACGGGGACCCGCAACAAGCGGTGGAGCATGTGGTTTAATTGGAAGCAACGCGAAGAACCTT<br>ACCAAATCTTGACATCCTTTGACCGCTCTAGAGATAGAGTTTTCTCTTCCGAGGACAAAGTGACAGGTGGTGCATGGTTGTCGTCAGCTC<br>GTGTCGTGAGATGTTGGGTAAAGTCCCGCAACGAGCGCAACCCCTTGAAGTTAGTTGCCATCATTAGTTGGGCACTCTAAGTTGACTGCCG<br>GTGACAAACCGGAGGAAGGTGGGGATGACGTCAAATCATCATGCCCTTATGATTTGGGCTACACACGTGCTACAATGGACAATACAAAG<br>GGCAGCGAAACCGGAGGTCAAGCAAATCCCATAAAGTTGTTCTCAGTTCGGATTGTAGTCTGCAACTCGACTACATGAAGCTGGAATCG<br>CTAGTAATCGTAGATCAGCATGCTACGGTGAATACGTTCCCGGGTCTGTACACACCGCCCGTCACACCAGGAGATTGTAAACACCCGA<br>AGCCGGTGGAGTAACCATTTTGGAGCTAGCCGTGGAAGGTGGGACAAATGATTGGGGTGAAGTCTGACAGAGGAAACCGTAAA | 99.34 | <i>Staphylococcus pseudintermedius</i>        |

|                                                                                                                                                                                                                                                                                                                                                                                                                                                                                                                                                                                                                                                                                                                                       |       |                                        |
|---------------------------------------------------------------------------------------------------------------------------------------------------------------------------------------------------------------------------------------------------------------------------------------------------------------------------------------------------------------------------------------------------------------------------------------------------------------------------------------------------------------------------------------------------------------------------------------------------------------------------------------------------------------------------------------------------------------------------------------|-------|----------------------------------------|
| CTCAGATTGAACGCTGGCGGCATGCTTTACACATGCAAGTCGGACGGCAGCACAGAGAAGCTTGCTTCTTGGGTGGCGAGTGGCGAACGGGTGAGTAATGCATCGGAACGTACCGAGTAGTGGGGGATAACTGTCCGAAAGGATGGCTAATACCGCATACACTTTGAGAAGGAAAGCAGGGGCTTTCCGACCTTTCGGCTATTTCGAGCGGCCGATGTCTGATTAGCTAGTTGGTGGGGTAAAGGCCCTACCAAGGCGACGATCAGTAGCGGGTCTGAGAGGATGATCCGCCACACTGGGACTGAGACACGGCCCAGACTCCTACGGGAGGCAGCAGTGGGGAATTTTGGACAATGGGCGCAAGCCTGATCCAGCCATGCCGCGTGTCTGAAGAAGGCCTTTCGGGTTGTAAAGGACTTTTGTACAGGAAGAAAAGGTTGTGGTTAATACC                                                                                                                                                                                                                                                                   | 99.73 | <i>Neisseria zoodegmatis</i>           |
| CATGACTGATGACGGTACCTGAAGAATAAGCACCGGCTAACTACGTGCCAGCAGCCGCGTAATACGTAGGGTGCGAGCGTTAATCGGAA                                                                                                                                                                                                                                                                                                                                                                                                                                                                                                                                                                                                                                             |       |                                        |
| TTACTGGGCGTAAAGCGGGCGCAGACGGTTACTTAAGTCAGATGTGAAATCCCCGGGCTCAACCTGGGAACTGCGTTTGAAACTGGGTGACTAGAGTATGTCAGAGGGGGGTAGAATTCCACGTGTAGCAGTGAAATGCCGTAGAGATGTGGAGGAATACCGATGGCGAAGGCAGCCCCCTGGGATAATACTGACGTTTCATGCCGAAAGCGTGGGTAGCAAAACAGGATTAGATACCTTGGTAGTCCACGCCCTAAACGATGTCAATTAGCTGTGTGGGCAACTTGATTGCTTAGTAGCGTAGCTAACGCGTGAAATTGACCGCCTGGGGAGTACGGTCGCAAGATTAATACTCAAAGGAAT                                                                                                                                                                                                                                                                                                                                                           |       |                                        |
| TGACGGGGACCCGCACAAAGCGGTGGATGATGTGGATTAATTCGATGCAACGCGAAGAACCCTTACCTGGTCTTGACATGTACGGAATCCTCCAGAGACGGAGGAGTGCCTTCGGGAGCCGTAACACAGGTGCTGCATGGCTGTCGTCAGCTCGTGTGAGATGTTGGGTAAAGTCCCGCAACGAGCGCAACCCTTGTCAATTAGTTGCCATCATTTGGTTGGGCACTCTAATGAGACTGCCGGTGACAAGCCGGAGGAAGGTGGGGATGACGTCAAGTCCTCATGGCCCTTATGACCAGGGCTTCACACGTCATACAATGGTCGGTACAAAGGTTAGCCAAGCCGCGAGGTGGAGCCAATCCCACAAAACCGATCGTAGTCCGGATTGCACTCTGCAACTCGAGTGCATGAAGTCGGAATCGCTAGTAATCGCAGGTCAGCATACTGCGGTGAATACGTGCCCGGCTCTGTACACACCGCCCGTACACCATGGGAGTGGGGGATACCAGAAGTAGGTAGGGTAACCGCAAGGGGCCCCCTTACCACGGTATGCTTCATGACTGG                                                                                                                                                  |       |                                        |
| TTTAGAGTTTGAATCATGGCTCAGGATGAACGCTGGCGCGTGCCTAATACATGCAAGTCGAGCGAACAGATAAGGAGCTTGCTCCTTTGACGTTAGCGGGCGGACGGGTGAGTAACACGTGGGTAACTACCTATAAGACTTGAATAACTCCGGGAAACCGGGGCTAATGCCGGATAACATGTTGAACCGCATGGTTCTACAGTGAAAGACGGTCTTGCTGTCACTTATAGATGGACCCGCGCCGTATTAGCTAGTTGGTGGGGTAACGGCCTACCAAGGCGACGATACGTAGCCGACCTGAGAGGGTGATCGGCCACACTGGAACTGAGACACGGTCCAGACTCCTACGGGAGGCAGCAGTAGGGAATCTCCGCAATGGGCGAAAGCCTGACGGAGCAACGCGCGTGAGTGATGAAGGTCTTCGGATCGTAAAGCTCTGTTGTTAGGGAAGAACAATGTGTAAGTAACTGTGCACATCTTGACGGTACCTAACAGAAAGCCACGGCTAACTACGTGCCAGCAGCCGCGTAATA                                                                                                                                                                                 | 99.14 | <i>Staphylococcus pseudintermedius</i> |
| CGTAGGKGGSRRCGTAYCCGGAATTATTGGGCGTAAAGCGCGCTAGGCGGTTTTTTAAGTCTGATGTGAAAGCCCACGGCTCAACCGTGGAGGGTCATTGGAAACTGGAAACTTGAGTGCAGAAGAGGAAAGTGAATTCATGTGTAGCGGTGAAATGCGCAGAGATATGGAGGAACACCAGTGGCGAAGGCGGCTTTCTGGTCTGCAACTGACGCTGATGTGCGAAAGCGWRGSSMYCAAACAGGATTAGATACCTTGGTAGTCCACGCGTAAACGATGAGTGTCTAAGTGTTAGGGGGTTTCCGCCCTTAGTGCTGCAGCTAACGCATTAAGCACTCCGCCCTGGGGAGTACGGTCGCAAGACTGAAACTCAAAGGAATTGACGGGACCCGCACAAGCGGTGGAGCATGTGGTTTTAATTCGAAGCAACGCGAAGAACCTTACCAAATCTTGACATCCTTTGACCGCTCTAGAGATAGAGTTTTCTCTTTCGGAGGACAAAGTGACAGGTGGTGCATGGTTGTCTCAGCTCGTGTCTGATGATGTTGGGTTAAGTCCCGCAACGAGCGCAACCCTGAACCTAGTTGCCATCATTAGTTGGGCACTCTAAGTTGACTGCCGGTGACAAACCGGAGGAAGGTGGGGATGACGTCAAATCATCATGCCCTTATGATTTGGGCTACACACGTGCTACAATGGACAATACAAA |       |                                        |
| GGGCAGCGAAACCGGAGGTCAAGCAAATCCATAAAGTTGTTCTCAGTTTCGGATTGTAGTCTGCAACTCGACTACATGAAGCTGGAATCGCTAGTAATCGTAGATCAGCATGCTACGGTGAATACGTTCCCGGGTCTGTACACACCGCCCGTACACCACGAGAGTTTGTAAACCCGAAGCCGGTGGAGTAACCATTTTGGAGCTAGCCGTCGAAGGTGGGACAAATGATTGGGGTGAAGTCGTACAGGGGAAACCGTAAA                                                                                                                                                                                                                                                                                                                                                                                                                                                                  |       |                                        |
| GGCTGCCTTTCGAGCTCAGCGTCAGTTACAGACCAGAGAGCCGCTTTCGCCACCGGTGTTCTCTCATATATCTACGCATTTACCGCTACA                                                                                                                                                                                                                                                                                                                                                                                                                                                                                                                                                                                                                                            | 99    | <i>Streptococcus sp. (canis)</i>       |
| CATGGAATTCCACTCTCCCCTTCTGCACTCAAGTTCTCCAGTTTCCAAAGCATACATTGGTTGAGCCAATGCCTTTAACTTCAGACTTAAAGAACCGCTGCGCTCGCTTTACGCCCAATAAATCCGGACAACGCTCGGGACCTACGTATTACCGCGGTGCTGGCACGTAGTTAGCCGTCTTTCTGTTAGTTACCGTCACATAATGGGTTTTCCACTCCATTACCGTTCTTCTCTAACAACAGAGCTTTACGATCCGAAAACCTTCTTCACTACGCGCGGTTGCTCGGTACGGGTTCCCCCATTTGCCGAAGATTCCCTACTGCTGCCTCCGTAGGAGTCTGGGCCGTGTCTCAGTCC                                                                                                                                                                                                                                                                                                                                                                 |       |                                        |
| CAGTGTGGCCGATCACCCTCTCAGGTCGGCTATGTATCGTCGCCTTGGTGAGCCTTTACCTCACCAACTAGCTAATACAACGCAGGTCCATCTCATAGTGGAGCAGTTGCCCTTTTAAAGTTCTTAACATGTGTTAAGCACTTTTATGCGGTATTAGCTATCGTTTCCAATAGTTATCCCCGCTATCAGGTAGGTTACCTACGCGTTACTCACCCGTTTCGCAACTCCTTAGACTAGTGCAAGCACCTGTCCTCAGCGTTCCTACTTGATGTATTAGGCACGCCCGCAGCGTTCGTCCTGAGCCATATTCCAAACTCTAAAAA                                                                                                                                                                                                                                                                                                                                                                                                   |       |                                        |

|                                                                                                                                                                                                                                                                                                                                                                                                                                                                                                                                                                                                                                                                                                                                                                                                                                                                                                                                                                                                                                                                                                                                                                                                                                                                                                                                                                                                                                                                                                                                                                                                             |       |                                  |
|-------------------------------------------------------------------------------------------------------------------------------------------------------------------------------------------------------------------------------------------------------------------------------------------------------------------------------------------------------------------------------------------------------------------------------------------------------------------------------------------------------------------------------------------------------------------------------------------------------------------------------------------------------------------------------------------------------------------------------------------------------------------------------------------------------------------------------------------------------------------------------------------------------------------------------------------------------------------------------------------------------------------------------------------------------------------------------------------------------------------------------------------------------------------------------------------------------------------------------------------------------------------------------------------------------------------------------------------------------------------------------------------------------------------------------------------------------------------------------------------------------------------------------------------------------------------------------------------------------------|-------|----------------------------------|
| <p>CTCAGATTGAACGCTGGCGGCAGGCTTAACACATGCAAGTCGAACGGTAGCAGGAAGAAAGCTTGCTTTCTTTGCTGACGAGTGCGGGAC<br/>GGGTGAGTAATGCTTGGGAATCTGGCTTATGGAGGGGGATAACTGTGGGAAACTGCAGCTAATACCGCGTATTCTCTGAGGAGGAAAGGG<br/>TGGGACCTTAGGGCCACTGCCCATAAGATGAGCCCAAGTGGGATTAGGTAGTTGGTGGGGTAAAGGCCTACCAAGCCTGCGATCTCTAGC<br/>TGGTCTGAGAGGATGACCAGCCACACTGGAAGTGAACACGGTCCAGACTCTACGGGAGGCAGCAGTGGGGAATATTGCGCAATGGGG<br/>GGAACCCTGACGCAGCCATGCCGCGTGAATGAAGAAGGCCTTCGGGTTGTAAAGTTCTTTTCGGTAATGAGGAAGGGATGTTGTTAAATAG<br/>ATAGCATCATTGACGTTAATTACAGAAGAAGCACCGGCTAACTCCGTGCCAGCAGCCGCGGTAATACGAGGGTGCGAGCGTTAATCGGA<br/>ATAACTGGGCGTAAAGGGCACGCAGGCGGACTTTTAAAGTGAGATGTGAAATCCCCGAGCTTAACTTGGGAACTGCATTTTCAGACTGGGAG<br/>TCTAGAGTACTTTAGGGAGGGGTAGAATTCACGTGTAGCGGTGAAATGCGTAGAGATGTGGAGGAATACCGAAGGCGAAGGCAGCCCT<br/>TGGGAATGTACTGACGCTCATGTGCGAAAGCGTGGGGAGCAAACAGGATTAGATACCCTGGTAGTCCACGCTGTAAACGCTGTCTGATTTG<br/>GGGATTGGGCTATATGCTTGGTGCCGAAGCTAACGTGATAAATCGACCGCCTGGGGAGTACGGCCGAAGGTTAAAACTCAAATGAATT<br/>GACGGGGGCCCCACAAAGCGGTGGAGCATGTGGTTTAATTCGATGCAACGCGAAGAACCCTTACCTACTCTTGACATCCTAAGAAGAGCTC<br/>AGAGATGAGCTTGTGCCTTCGGGAACCTAGAGACAGGTGCTGCATGGCTGTCGTGAGCTCGTGTGTGAAATGTTGGGTAAAGTCCCGCAA<br/>CGAGCGCAACCCTTATCCTTTGTTGCCAGCGATTTCGGTCGGGAACTCAAAGGAGACTGCCAGTGACAACTGGAGGAAGGTGGGGATGAC<br/>GTCAAGTCATCATGGCCCTTACGAGTAGGGCTACACACGTGCTACAATGGTGCATACAGAGGGCAGCGAGAGTGCAGCTTGAGCGAATC<br/>TCAGAAAAGTGCATCTAAGTCCGGATTGGAGTCTGCAACTCGACTCCATGAAGTCGGAATCGCTAGTAATCGCAAATCAGAATGTTGCGGT<br/>GAATACGTTCCCGGGCCTTGACACACCGCCCGTACACCATGGGAGTGGGTTGTACCAGAAGTAGATAGCTTAACCTTCGGGGGGGCGT<br/>TTACCACGGTATGATTGACTGGGGT</p> | 100   | <i>Pasteurella multocida</i>     |
| <p>GGCTGCCTTTCGAGCTCAGCGTCAGTTACAGACCAGAGAGCCGCTTTCGCCACCGGTGTTCTCCATATATCTACGCATTTACCGCTACA<br/>CATGGAATTCCACTCTCCCTTCTGCACTCAAGTTCTCCAGTTTCCAAAGCATACATTGGTTGAGCCAATGCCTTTAACTTCAGACTTAAAG<br/>AACCGCTGCGCTCGCTTTACGCCCCAATAAATCCGGACAACGCTCGGGACCTACGTATTACCGCGGTGCTGGCACGTAGTTAGCCGTCC<br/>CTTTCTGGTTAGTTACCGTCACATAATGGGTTTTCCACTCCCATACCCTTCTCTCTAACAACAGAGCTTTACGATCCGAAAACCTTCTTC<br/>ACTCACGGCGGTGCTCGGTGAGGTTCCCCCATTTGCCGAAGATTCCCTACTGCTGCCTCCCGTAGGAGTCTGGGCGGTGCTCAGTCC<br/>CAGTGTGGCCGATCACCTCTCAGGTGCGCTATGTATCGTCGCTTGGTGAGCCTTTACCTCACCAACTAGCTAATACAACGCAGGTCCAT<br/>CTCATAGTGGAGCAGTTGCCCTTTTAAAGTTCTTAAACATGTGTTAAGCACTTTTATGCGGTATTAGCTATCGTTTCCAATAGTTATCCCCG<br/>CTATCAGGTAGGTTACCTACGCGTTACTCACCGGTTGCAACTCCTTAGACTAGTGCAAGCACCTGTCCTCAGCGTTCTACTTGCATGTATT<br/>AGGCAGCGCCAGCGTTCGTCTGAGCCATATTCAAACTCTAAAAA</p>                                                                                                                                                                                                                                                                                                                                                                                                                                                                                                                                                                                                                                                                                                                                                                   | 99    | <i>Streptococcus sp. (canis)</i> |
| <p>GATTGAACGCTGGCGGCATGCTTTACACATGCAAGTCGGACGGCAGCACAGAGAAGCTTGCTTCTTGGGTGGCGAGTGGCGAACGGGTGA<br/>GTAATGCATCGGAACGTACCGAGTAGTGGGGGATAAAGTCCGAAAGGATGGCTAATACCGCATACGCTTTGAGAAGGAAAGCAGGGGCT<br/>CTTCGGACCTTGCGCTATTGAGCGGCCGATGTCTGATTAGCTGGTTGGTGGGGTAAAGGCCTACCAAGGCGACGATCAGTAGTGGGTCTG<br/>AGAGGATGATCCGCCACACTGGGACTGAGACACGGCCAGACTCCTACGGGAGGCAGCAGTGGGGAATTTTGGACAATGGGCGCAAGCC<br/>TGATCCAGCCATGCCGCGTGTCTGAAGAAGGCCTTCGGGTTGTAAAGGACTTTTGTACAGGGAAGAAAAGGTTGTGGTTAATACCCATGACT<br/>GATGACGGTACCTGAAGAATAAGCACCGGCTAACTACGTGCCAGCAGCCGCGGTAATACGTAGGGTGCGAGCGTTAATCGGAATTAAGTGG<br/>GCGTAAAGCGGGCGCAGACGTTACTTAAAGTCAGATGTGAAATCCCCGGGCTCAACCTGGGAACTGCGTTTGAAACTGGGTGACTAGAGT<br/>ATGTGAGAGGGGGGTAGAATTCACGTGTAGCAGTGAAATGCGTAGAGATGTGGAGGAATACCGATGGCGAAGGCAGCCCCCTGGGATA<br/>ATACTGACGTTTCATGCCCCAAAGCGTGGGTAGCAAACAGGATTAGATACCCTGGTAGTCCACGCCCTAAACGATGTCAATTAGTGTGG<br/>GCAACTTGATTGCTTAGTAGCGTAGCTAACGCGTGAAATTGACCGCCTGGGGAGTACGGTCGCAAGATTAAGTCTAAAGGAATTGACGG<br/>GGACCCGCACAAGCGGTGGATGATGTGGATTAATTCGATGCAACGCGAAGAACCCTTACCTGGTCTTGACATGTACGGAATCCTCCAGAGA<br/>CGGAGGAGTGCCCTTCGGGAGCCGTAACACAGGTGCTGCAATGGCTGTCAGCTCGTGTGAGATGTTGGGTAAAGTCCCGCAACGAG<br/>CGCAACCCTTGTCAATTAGTTGCCATCATTTGGTTGGGCACTCTAATGAGACTGCCGGTGACAAGCCGGAGGAAGGTGGGGATGACGTCAA<br/>GTCCTCATGGCCCTTATGACCAGGGCTTCACACGTATACAATGGTCCGTACAGAGGGTAGCCAAGCCGCGAGGTGGAGCCAATCCACA<br/>AAACCGATCGTAGTCCGATTGCACTCTGCAACTCGAGTGCATGAAGTCGGAATCGCTAGTAATCGCAGGTCAGCATACTGCGGTGAATA<br/>CGTTCCCGGGTCTTGATACACACCGCCCGTACACCATGGGAGTGGGGATACCAGAAGTAGGTAGGGTAACCGCAAGGAGCCCGCTTACC<br/>ACGGTATGCTTCATGACTGGGGT</p>        | 99.93 | <i>Neisseria zoodegmatis</i>     |

|                                                                                                                                                                                                                                                                                                                                                                                                                                                                                                                                                                                                                                                                                                                                                                                                                                                                                                                                                                                                                                                                                                                                                                                                                                                                                                                                                                                                                                                                                                                                                                                                                                   |     |                              |
|-----------------------------------------------------------------------------------------------------------------------------------------------------------------------------------------------------------------------------------------------------------------------------------------------------------------------------------------------------------------------------------------------------------------------------------------------------------------------------------------------------------------------------------------------------------------------------------------------------------------------------------------------------------------------------------------------------------------------------------------------------------------------------------------------------------------------------------------------------------------------------------------------------------------------------------------------------------------------------------------------------------------------------------------------------------------------------------------------------------------------------------------------------------------------------------------------------------------------------------------------------------------------------------------------------------------------------------------------------------------------------------------------------------------------------------------------------------------------------------------------------------------------------------------------------------------------------------------------------------------------------------|-----|------------------------------|
| <p>GCTCAGGATGAACGCTGGCGGCGTGCCTAATACATGCAAGTCGAGCGAACAGATAAGGAGCTTGCTCCTTTGACGTTAGCGGCGGACGGG<br/>TGAGTAACACGTGGGTAACCTACCTATAAGACTGGAATAACTCCGGGAAACCGGGGCTAATGCCGGATAACATTTAGAACCGCATGGTTC<br/>TAAAGTGAAAAGATGGTTTTGGCTATCACTTATAGATGGACCCCGCCGCTATTAGCTAGTTGGTAAGGTAACGGCTTACCAAGGCAACGATAC<br/>GTAGCCGACCTGAGAGGGTGATCGGCCACACTGGAAGTGAGACACGGTCCAGACTCCTACGGGAGGCAGCAGTAGGGAATCTTCCGCAA<br/>TGGGCGAAAGCCTGACGGAGCAACGCCGCTGAGTGATGAAGGTCTTCGGATCGTAAAACTCTGTTATTAGGGAAGAACAAATGTGTAAG<br/>TAACTGTGCACGTCTTGACGGTACCTAATCAGAAAGCCACGGCTAACTACGTGCCAGCAGCCGCGGTAATACGTAGGTGGCAAGCGTTAT<br/>CCGGAATTATTGGGCGTAAAGCGCGCTAGGCGGTTTTCTTAAGTCTGATGTGAAAGCCCACGGCTCAACCGTGGAGGGTCATTGGAAACT<br/>GGGAAACTTGAGTGCAGAAAGAGGAAAGTGGAATTCCATGTGTAGCGGTGAAATGCGCAGAGATATGGAGGAACACCAGTGCGGAAGGCG<br/>ACTTCTGCTGTGTAAGTACGCTGATGTGCGAAAGCGTGGGGATCAAACAGGATTAGATACCCTGGTAGTCCACGCCGTAAACGATGAG<br/>TGCTAAGTGTTAGGGGTTTTCCGCCCTTAGTGCTGCAGCTAACGCATTAAGCACTCCGCCTGGGGAGTACGACCGCAAGGTTGAAACTC<br/>AAAGGAATTGACGGGGACCCGCACAAGCGGTGGAGCATGTGGTTTAAATCGAAGCAACGCGAAGAACCCTTACCAAATCTTGACATCCTTT<br/>GACAACTCTAGAGATAGAGCCTTCCCTTTCGGGGGACAAAGTGACAGGTGGTGCATGGTTGTCGTCAGCTCGTGTGAGATGTTGGGTT<br/>AAGTCCCGCAACGAGCGCAACCCTTAAGCTTAGTTGCCAGCATTAAAGTTGGGCACTCTAAGTTGACTGCCGGTGACAAACCGGAGGAAGG<br/>TGGGGATGACGTCAAATCATCATGCCCTTATGATTTGGGCTACACACGTGCTACAATGGACAATACAAAGGCGAGCTAAACCGCGAGGT<br/>CATGCAAAATCCCATAAAGTTGTTCTCAGTTCCGATTGTAGTCTGCAACTCGACTACATGAAGCTGGAATCGCTAGTAATCGTAGATCAGCA<br/>TGCTACGGTGAATACGTTCCCGGGTCTGTACACACCGCCCGTACACCACGAGAGTTTGTAAACACCCGAAGCCGGTGGAGTAACCATCT<br/>ATGGAGCTAGCCGTCGAAGGTGGGACAAATGATTGGGGTGAAGT</p> | 100 | <i>Staphylococcus cohnii</i> |
| <p>CTCAGATTGAACGCTGGCGGCATGCTTTACACATGCAAGTCGGGACGGCAGCACAGAGAAGCTTGCTTCTGGGTGGCGAGTGGCGAACGG<br/>GTGAGTAATGCATCGGAACGTACCGAGTAGTGGGGGATAACTGTCCGAAAGGATGGCTAATACCGCATACGCTTTGAGAAGGAAAGCAG<br/>GGGCTCTTCGACCTTGCGCTATTGAGCGGGCGATGTCTGATAGCTGGTTGGTGGGGTAAAGGCCTACCAAGGCGACGATCAGTAGCG<br/>GGTCTGAGAGGATGATCCGCCACACTGGGACTGAGACACGGCCCAGACTCCTACGGGAGGCAGCAGTGGGGAATTTTGGACAATGGGCG<br/>CAAGCCTGATCCAGCCATGCCGCGTGTCTGAAGAAGGCCTTTCGGGTTGTAAAGGACTTTTGTGTCAGGGAAGAAAAGGTTGTGGTTAATACC<br/>CATGACTGATGACGGTACCTGAAGAATAAGCACCGGCTAACTACGTGCCAGCAGCCGCGTAATACGTAGGGTGCGAGCGTTAATCGGAA<br/>TTACTGGGCGTAAAGCGGGCGCAGACGGTTACTTAAGTCAGATGTGAAATCCCCGGGCTCAACCTGGGAACTGCGTTTGAAACTGGGTGA<br/>CTAGAGTATGTGAGAGGGGGGTAGAATTCACGTGTAGCAGTGAAATGCGTAGAGATGTGGAGGAATACCGATGGCGAAGGCAGCCCCCT<br/>GGGATAATACTGACGTTTCATGCCGAAAGCGTGGGTAGCAAAACAGGATTAGATACCCTGGTAGTCCACGCCCTAAACGATGTCAATTAGC<br/>TGTTGGGCAACTTGATTGCTTAGTAGCGTAGCTAACGCGTGAAATTGACCGCTGGGGAGTACGGTCGCAAGATTAAAACTCAAAGGAAT<br/>TGACGGGGACCCGCACAAGCGGTGGATGATGTGGATTAATTTCGATGCAACGCGAAGAAACCTTACCTGGTCTTGACATGTACGGAATCCTC<br/>CAGAGACGGAGGAGTGCCTTCGGGAGCCGTAACACAGGTGCTGCATGGCTGTCGTCAGCTCGTGTGAGATGTTGGGTAAAGTCCCGC<br/>AACGAGCGCAACCCTTGTCAATTAGTTGCCATCATTTGGTTGGGCACTCTAATGAGACTGCCGGTGACAAGCCGGAGGAAGGTGGGGATGA<br/>CGTCAAGTCCTCATGGCCCTTATGACCAGGGCTTACACGTCATACAATGGTCGGTACAGAGGGTAGCCAAGCCGCGAGGTGGAGCCAAT<br/>CCCACAAAACCGATCGTAGTCCGGATTGCACTCTGCAACTCGAGTGCATGAAGTCGGAATCGCTAGTAATCGCAGGTCAGCATACTGCGG<br/>TGAATACGTTCCCGGGTCTTGTACACACCGCCCGTCACACCATGGGAGTGGGGGATACCAGAAGTAGGTAGGGTAACCGCAAGGAGCCCG<br/>CTTACCACGGTATGCTTCATGACTGGGGTGAAGTCGTAC</p>         | 100 | <i>Neisseria zoodegmatis</i> |

|                                                                                                                                                                                                                                                                                                                                                                                                                                                                                                                                                                                                                                                                                                                                                                                                                                                                                                                                                                                                                                                                                                                                                                                                                                                                                                                                                                                                                                                                                                                                                                                               |       |                              |
|-----------------------------------------------------------------------------------------------------------------------------------------------------------------------------------------------------------------------------------------------------------------------------------------------------------------------------------------------------------------------------------------------------------------------------------------------------------------------------------------------------------------------------------------------------------------------------------------------------------------------------------------------------------------------------------------------------------------------------------------------------------------------------------------------------------------------------------------------------------------------------------------------------------------------------------------------------------------------------------------------------------------------------------------------------------------------------------------------------------------------------------------------------------------------------------------------------------------------------------------------------------------------------------------------------------------------------------------------------------------------------------------------------------------------------------------------------------------------------------------------------------------------------------------------------------------------------------------------|-------|------------------------------|
| GGCTCAGATTGAACGCTGGCGGCATGCTTTACACATGCAAGTCGACGGCAGCACAGAGAAGCTTGCTTCTTGGGTGGCGAGTGGCGAAC<br>GGGTGAGTAATGCATCGGAACGTACCGAGTAGTGGGGGATAACTGTCCGAAAGGATGGCTAATACCGCATACGCTTTGAGAAGGAAAGC<br>AGGGGCTCTTTCGGACCTTGCGCTATTTCGAGCGGCCGATGTCTGATTAGCTGGTTGGTGGGGTAAAGGCCCTACCAAGGCGACGATCAGTAG<br>CGGGTCTGAGAGGATGATCCGCCACACTGGGACTGAGACACGGCCCAGACTCCTACGGGAGGCAGCAGTGGGGAATTTTGGACAATGGG<br>CGCAAGCCTGATCCAGCCATGCCGCGTGTCTGAAGAAGGCCCTTCGGGTTGTAAGGACTTTTGTACAGGGAAGAAAAGGTTGTGGTTAATA<br>CCCATGACTGATGACGGTACCTGAAGAATAAGCACCGGCTAACTACGTGCCAGCAGCCGCGGTAAATACGTAGGGTGCGAGCGTTAATCGG<br>AATTACTGGGCGTAAAGCGGGCGCAGACGGTTACTTAAAGTCAGATGTGAAATCCCCGGGCTCAACCTGGGAACTGCGTTTGAAACTGGGT<br>GACTAGAGTATGTGAGAGGGGGGTAGAATTCCACGTGTAGCAGTGAAATGCGTAGAGATGTGGAGGAATACCGATGGCGAAGGCAGCCC<br>CCTGGGATAATACTGACGTTTCATGCCGAAAGCGTGGGTAGCAAAACAGGATTAGATACCTGGTAGTCCACGCCCTAAACGATGTCAATT<br>AGCTGTTGGGCAACTTGATTGCTTAGTAGCGTAGCTAACGCGTGAAATTGACCGCCTGGGGAGTACGGTCGCAAGATTAAAACTCAAAGG<br>AATTGACGGGGACCCGCACAAGCGGTGGATGATGTGGATTAATTCGATGCACGCGAAGAACCCTTACCTGGTCTTGACATGTACGGAATC<br>CTCCAGAGACGGAGGAGTGCCTTCGGGAGCTGTAACACAGGTGCTGCATGGCTGTCGTCAGCTCGTGTGAGATGTTGGGTAAAGTCC<br>CGCAACGAGCGCAACCCTTGTCATTAGTTGCCATCATTGGTTGGGCACTCTAATGAGACTGCCGGTGACAAGCCGGAAGGTGGGGA<br>TGACGTCAAGTCCTCATGGCCCTTATGACCAGGGCTTCACACGTCATACAATGGTCGGTACAGAGGGTAGCCAAGCCGCGAGGTGGAGCC<br>AATCCCAAAAACCGATCGTAGTCCGGATTGCACTCTGCAACTCGAGTGCATGAAGTCGGAATCGCTAGTAATCGCAGGTCAGCATACTG<br>CGGTGAATACGTTCCCGGGTCTTGTAACACACCGCCGTCACACCATGGGAGTGGGGGATACCAGAAGTAGGTAGGGTAACCGCAAGGAGC<br>CCGCTTACCACGGTATGCTTCATGACTGGGGTG   | 99.93 | <i>Neisseria zoodegmatis</i> |
| CTCAGATTGAACGCTGGCGGCAGGCCTAACACATGCAAGTCGAGCGGTAACAGGGGAAGCTTGCTTCTCGCTGACGAGCGGCGGACGGGT<br>GAGTAATGTATGGGGATCTGCCCGATAGAGGGGGATAACTACTGGAACGGTGGCTAATACCGCATAATCTCTTAGGAGCAAAGCAGGGG<br>ACCTTCGGGCTTTCGCTGTGCGATGAACCCATATGGGATTAGCTAGTAGGTAAGGTAATGGCTTACCTAGGCGACGATCCCTAGCTGGTC<br>TGAGAGGATGATCAGCCACACTGGGACTGAGACACGGCCCAGACTCCTACGGGAGGCAGCAGTGGGGAATATTGCACAATGGGCGCAAG<br>CCTGATGCAGCCATGCCGCGTGTATGAAGAAGGCCCTAGGGTTGTAAGTACTTTTCAGTCGGGAGGAAGGCGTTGATGTTAATACCATCA<br>ACGATTGACGTTACCGACAGAAGAAGCACCGGCTAACTCCGTGCCAGCAGCCGCGGTAATACGGAGGGTGCAAGCGTTAATCGGAATTAC<br>TGGGCGTAAAGCGCACGCAGGCGGTTAATTAAGTTAGATGTGAAATCCCCGGGCTTAACCTGGGAATGGCATCTAAGACTGGTTAGCTAG<br>AGTCTTGTAGAGGGGGGTAGAATTCCATGTGTAGCGGTGAAATGCGTAGAGATGTGGAGGAATACCGGTGGCGAAGGCGGGCCCCCTGGAC<br>AAAGACTGACGCTCAGGTGCGAAAGCGTGGGGAGCAAACAGGATTAGATACCCTGGTAGTCCACGCTGTAACGATGTGCGATTTGGAGGT<br>TGTTCCCTAGAGGAGTGGCTTCCGGAGCTAACGCGTTAAATCGACCGCCTGGGGAGTACGGCCGCAAGGTTAAACTCAAATGAATTGAC<br>GGGGGCCCCGCAACAAGCGGTGGAGCATGTGGTTTAATTCGATGCAACGCGAAGAACCCTTACCTACTCTTGACATCCAGAGAATTGAGCAGA<br>GATGCTGAAGTGCCTTCGGGAGCTCTGAGACAGGTGCTGCATGGCTGTCGTCAGCTCGTGTGTGAAATGTTGGGTAAAGTCCCGCAACGA<br>GCGCAACCCTTATCCTTTGTTGCCAGCGATTCCGGTCGGGAACCTCAAAGGAGACTGCCGGTGATAAACCGGAGGAAGGTGGGGATGACGTC<br>AAGTCATCATGGCCCTTACGAGTAGGGCTACACACGTGCTACAATGGCGTATACAAAGAGAAGCGACCTCGCGAGAGCAAGCGGAACCTC<br>ATAAAGTACGTCGTAGTCCGGATTGGAGTCTGCAACTCGACTCCATGAAGTCGGAATCGCTAGTAATCGTAGATCAGAATGCTACGGTGA<br>ATACGTTCCCGGGCCTTGTAACACACCGCCGTCACACCATGGGAGTGGGTTGCAAAAGAAGTAGGTAGCTTAACTTCGGGAGGCGCCTT<br>ACCACCTTGTGATCCATGACTGGGGTG | 100   | <i>Providencia stuartii</i>  |
