# Supplementary material for: Isolation of Oral Bacteria, Measurement of the C-Reactive Protein, and Blood Clinical Parameters in Dogs with Oral Tumor
Source: Vet Med Int. 2023 Mar 22;2023:2582774. doi: 10.1155/2023/2582774 (PMC10060073; doi:10.1155/2023/2582774)
Supplement: Supplementary Materials — Supplementary file 1: the nucleotide sequences of bacterial isolates from the no oral mass dogs. Supplementary file 2: the nucleotide sequences of bacterial isolates from the dogs with oral mass. [file 2582774.f1.zip]

Archive with 2 entries (2 files):
- 1. Supplementary file 1-The nucleotide sequences of bacterial isolates from the no oral mass dogs.pdf
- 2. Supplementary file 2-The nucleotide sequences of bacterial isolates from the dogs with oral mass  (1).pdf
